# Supplementary material for: A negative genetic interaction map in isogenic cancer cell lines reveals cancer cell vulnerabilities
Source: PubMed Central journal article supplement (PMC3817404; doi:10.1038/msb.2013.54), 2013-10-08
Supplement: msb201354-s12.pdf [file msb201354-s12.pdf]

Name 1: CDK12\_HUMAN  
Name 2: CTK1\_YEAST

Cyclin-dependent kinase 12 OS=Homo sapiens GN=CDK12 PE=1 SV=2  
CTD kinase subunit alpha OS=Saccharomyces cerevisiae (strain ATCC 204508 / S288c)  
GN=CTK1 PE=1 SV=1

Needed for following interaction(s):  
yeast genetic RASK\_HUMAN CDK12\_HUMAN KRAS CDK12 IRA2\_YEAST  
CTK1\_YEAST

Length sequence 1: 1490  
Length sequence 2: 528  
Sequence #1: CDK12\_HUMAN  
Sequence #2: CTK1\_YEAST  
Length #1: 612  
Length #2: 612  
Matrix: BLOSUM62  
Gap open: 2.0  
Gap extend: 1.0  
Length: 612  
Identity: 220/612 (35.95%)  
Similarity: 318/612 (51.96%)  
Gaps: 176/612 (28.76%)  
Score: 979.00

|             |      |                                                      |      |
|-------------|------|------------------------------------------------------|------|
| CDK12_HUMAN | 538  | PL-PTTTPPPPQTPPLPPLPPIPALPQQPPL-PPSQPAFQVQPASSTSTLP  | 585  |
| CTK1_YEAST  | 20   | PLFGKRSFNPQS--L-ARPP-P--PKR--IRTDS--GY-Q---SNMNDI-   | 54   |
| CDK12_HUMAN | 586  | PSTHSKTSAVSSQANSQP-PVQVSVK--TQVS-V--TAAIPLHKTSTLPP   | 629  |
| CTK1_YEAST  | 55   | --SSH-R---VNS--NDQPQHTK-S-RGNNNLSRYNDTS----FQTSS---  | 88   |
| CDK12_HUMAN | 630  | LPLPPLLPDGD--DDMDSPKETLPSKPKVKEKEQTRHLLTDLPLPPELPG   | 677  |
| CTK1_YEAST  | 89   | -----RYQGSRYNNNTSYENRP-KSIKRD-E--TK---AEF-L-SHLPK    | 124  |
| CDK12_HUMAN | 678  | GDLSPDPSPEPKA-I-----TP-P-QQPY---K---K---R---PKI      | 704  |
| CTK1_YEAST  | 125  | G----PKSVE-KSRYNSSNTSNDIKNGYHASKYHNKQEGRSVIKAV       | 169  |
| CDK12_HUMAN | 705  | CCPRYG---ERRQTESDWGKRCVDFDI-IGI-IGEGTYGQVYKAKDKDT    | 749  |
| CTK1_YEAST  | 170  | --P-VSVLTQQRST-S-----V--Y-LRI-MQVGEGETYGVYKAKNTNT    | 205  |
| CDK12_HUMAN | 750  | GE-LVALKKVRLDNEKEGFPITAIREIKILRQLI-HRSVVMKEIVTDKQ    | 797  |
| CTK1_YEAST  | 206  | -EKLVAKKLRQLQGEREGFPITSIREIKL-QSFDHPNVSTIKEIMVESQ    | 253  |
| CDK12_HUMAN | 798  | DALDFKKDKGAFYLVFEYMDHDLMLGLL---ESGL-V-HFSE-DHIKSFMK  | 841  |
| CTK1_YEAST  | 254  | -----K-TVYMFYADNDLSGLLLNKE--VQISH-SQCKHL--F-K        | 288  |
| CDK12_HUMAN | 842  | QLMEGLELYCH-KKNFLHRDIKCSNILLNNSGQIKLADFLGAR-LYNSEES  | 889  |
| CTK1_YEAST  | 289  | RLLLGMEYLHDNK-ILHRDVKGSNILIDNQNLKITDFGLARKM-N---S    | 333  |
| CDK12_HUMAN | 890  | R-PYTNKVVITLWYRPPPELLLGEERY-TPAIDVWSCGICLGEFTKPKPIFQ | 937  |
| CTK1_YEAST  | 334  | RADYTNRVITLWYRPPPELLLGTNYGT--EVDMWGCGCLLVELFNKTAIFQ  | 382  |
| CDK12_HUMAN | 938  | -ANLELAQLELISRLCGSPCAV--WPDVIKLP-YFNTMKPKK--QYRRR    | 981  |
| CTK1_YEAST  | 383  | GSN-ELEQIESIFKIMGT--PTINSWPTLYDMPWFMMIM-PQQTTKYVNN   | 428  |
| CDK12_HUMAN | 982  | LREEF-SFIPSA-ALDL-LDHMLTLDPSKRCTAETLQSDFLKDVLSKM     | 1028 |
| CTK1_YEAST  | 429  | FSEKFKSVLPSSKCLQLAI-NLLCYDQTKRFSATEALQSDYFKE-E-PK-   | 474  |
| CDK12_HUMAN | 1029 | AP-P---D-LPHWQDCHELWS-KKRRRQRQSGVVVEPPPS-KTSRKETT    | 1071 |
| CTK1_YEAST  | 475  | -PEPLVLDGL---VSCHE-YEVKLARKQKRPNIL-----STNTNNK--G    | 511  |

|             |      |              |      |
|-------------|------|--------------|------|
| CDK12_HUMAN | 1072 | SGTSTEPVKNSS | 1083 |
|             |      | : . . . . :: |      |
| CTK1_YEAST  | 512  | NGNSNN--NNNN | 521  |

-----

Name 1: PCNA\_HUMAN  
Name 2: PCNA\_YEAST

Proliferating cell nuclear antigen OS=Homo sapiens GN=PCNA PE=1 SV=1  
Proliferating cell nuclear antigen OS=Saccharomyces cerevisiae (strain ATCC 204508 / S288c) GN=POL30 PE=1 SV=1

Needed for following interaction(s):  
yeast genetic MUS81\_HUMAN PCNA\_HUMAN MUS81 PCNA MUS81\_YEAST  
PCNA\_YEAST

Length sequence 1: 261  
Length sequence 2: 258  
Sequence #1: PCNA\_HUMAN  
Sequence #2: PCNA\_YEAST  
Length #1: 280  
Length #2: 280  
Matrix: BLOSUM62  
Gap open: 2.0  
Gap extend: 1.0  
Length: 280  
Identity: 107/280 (38.21%)  
Similarity: 175/280 (62.50%)  
Gaps: 43/280 (15.36%)  
Score: 565.00

|            |     |                                                     |     |
|------------|-----|-----------------------------------------------------|-----|
| PCNA_HUMAN | 1   | MFEARLVQGSILKKVLEALKD---LIN-EACWDISSGVNL-QSMDSSHV   | 45  |
| PCNA_YEAST | 1   | MLEAKFEASLFKRIIDGFKDCVQLVNFQ-C---KEDGI-IAQAVDDSRV   | 45  |
| PCNA_HUMAN | 46  | SLVQLTLRSEGFDTYRCDRLNLAGVNLTSMSKILKAGNE-DIITLRAED   | 94  |
| PCNA_YEAST | 46  | LLVSLEIGVEAFQYERCDHPVTLGMDLTSLSKILRC-GNNTDTLTLIA-D  | 93  |
| PCNA_HUMAN | 95  | NA-DTLALVFAPNQEKVSDYEMKMLDLDVEQLGIPEQ-EY-SCVVKMPS   | 141 |
| PCNA_YEAST | 94  | NTPDSIILLFEDTKKDRIAAYSLSKLMIDADFLKI-EELQYDS-TLSLPS  | 141 |
| PCNA_HUMAN | 142 | GEFARICRDLSHIGDAV-V-ISCAKDGKFKFSASGELNGN--IK-LSQTS  | 186 |
| PCNA_YEAST | 142 | SEFSKIVRDLSQLSDSINIMIT--KETIKFVADGDIGSGSVIIPKPF---- | 185 |
| PCNA_HUMAN | 187 | NVDKE--EEAVTIEMNEPVQLTF-ALRY-LNFFTATPLSSTVTLSMSAD   | 232 |
| PCNA_YEAST | 186 | -VDMHEPETSIKLEMDQPVDLTFGA-KYLLDII-KGSSLSDRVGIRLSSE  | 232 |
| PCNA_HUMAN | 233 | VP-LVVEYKIADM--GHLKYYLAPKIEDEE                      | 259 |
| PCNA_YEAST | 233 | APAL---FQF-DLKSGFLQFFLAPKFNDDEE                     | 258 |

-----

Name 1: PRDX3\_HUMAN  
Name 2: TSA1\_YEAST

Thioredoxin-dependent peroxide reductase, mitochondrial OS=Homo sapiens GN=PRDX3  
PE=1 SV=3  
Peroxiredoxin TSA1 OS=Saccharomyces cerevisiae (strain ATCC 204508 / S288c) GN=T  
SA1 PE=1 SV=3

Needed for following interaction(s):  
yeast genetic PRDX3\_HUMAN MUS81\_HUMAN PRDX3 MUS81 TSA1\_YEAST  
MUS81\_YEAST

Length sequence 1: 256  
Length sequence 2: 196  
Sequence #1: PRDX3\_HUMAN  
Sequence #2: TSA1\_YEAST  
Length #1: 198  
Length #2: 198

Matrix: BLOSUM62  
Gap open: 2.0  
Gap extend: 1.0  
Length: 198  
Identity: 119/198 (60.10%)  
Similarity: 149/198 (75.25%)  
Gaps: 9/198 (4.55%)  
Score: 619.00

|             |     |                                                       |     |
|-------------|-----|-------------------------------------------------------|-----|
| PRDX3_HUMAN | 64  | A-VTQ-HAPYFKGTAVVNGEFKD-LSLDDFKGKYLVLFFYPDLDFTFVCPT   | 110 |
| TSA1_YEAST  | 3   | AQV-QKQAPTFFKKTAVVDGVF-DEVSLDKYKGYVLLAFIPLAFTFVCPT    | 50  |
| PRDX3_HUMAN | 111 | EIVAFSDKANEFHVDNCEVV-AVSVDSHFSLAWINTPRKNGGLGHMIA      | 159 |
| TSA1_YEAST  | 51  | EIIAFSEAAKKFEEQGAQVLFSA-STDSEYSLLAWTNIIPRKEGGLGPNINIP | 99  |
| PRDX3_HUMAN | 160 | LLSDLTK-QISRDYGVLLLEGSLALRGLFIIDPNGVIKHLVNDLPGVGRS    | 208 |
| TSA1_YEAST  | 100 | LLAD-TNHSLSRDYGVLEIEEGVALRGLFIIDPKGVIRHITINDLPVGRN    | 148 |
| PRDX3_HUMAN | 209 | VEETLRLVKAFQYVETHGEVCPANWTPDSPTIKPSPAASKEYFQKVNQ      | 256 |
| TSA1_YEAST  | 149 | VDEALRLVEAFQWTDKNGTVLPCNWTPGAATIKPTVEDSKEYFEAANK      | 196 |

Name 1: CDC23\_HUMAN  
Name 2: CDC23\_YEAST

Cell division cycle protein 23 homolog OS=Homo sapiens GN=CDC23 PE=1 SV=3  
Anaphase-promoting complex subunit CDC23 OS=Saccharomyces cerevisiae (strain ATCC 204508 / S288c) GN=CDC23 PE=1 SV=1

Needed for following interaction(s):

|                |             |             |       |       |             |
|----------------|-------------|-------------|-------|-------|-------------|
| yeast genetic  | CDC23_HUMAN | PTTG1_HUMAN | CDC23 | PTTG1 | CDC23_YEAST |
| yeast physical | CDC23_HUMAN | PTTG1_HUMAN | CDC23 | PTTG1 | CDC23_YEAST |
| AST            | SECU_YEAST  |             |       |       |             |

Length sequence 1: 597  
Length sequence 2: 626  
Sequence #1: CDC23\_HUMAN  
Sequence #2: CDC23\_YEAST  
Length #1: 688  
Length #2: 688  
Matrix: BLOSUM62  
Gap open: 2.0  
Gap extend: 1.0  
Length: 688  
Identity: 246/688 (35.76%)  
Similarity: 361/688 (52.47%)  
Gaps: 214/688 (31.10%)  
Score: 1062.00

|             |     |                                                       |     |
|-------------|-----|-------------------------------------------------------|-----|
| CDC23_HUMAN | 22  | INSDFS-D--LREIKKQLLLIAGLTRE--RGLLH-SSKWSAE-LAFSL-P    | 63  |
| CDC23_YEAST | 1   | MNDD-SQDKIIHDIRIQLRK-AA-T-ELSRSLYGGSSKWAAEALA-GLAE    | 45  |
| CDC23_HUMAN | 64  | AL-----PLA-E--L---Q--PP-----ITE-EDAQMDDAYTL           | 89  |
| CDC23_YEAST | 46  | AIDVDQTHSLADESPLRNKQGVKQMFQIPQNGFGLSETE--YDL--YLL     | 91  |
| CDC23_HUMAN | 90  | AKAYFDVKEYDRAAHFLHG-CNSKKAY--FLYMSRYLSGEEK-----       | 129 |
| CDC23_YEAST | 92  | GSTLFDFAKEFDRCVFLKDVNTN---PYLKFLLKLYSKFSLWDDKKSQESMEN | 138 |
| CDC23_HUMAN | 130 | -----K-DDE--TV----D-SLG--PL-EKG-Q---VK---NE-----      | 149 |
| CDC23_YEAST | 139 | ILTTGKFTDEMYRANKDGDGS-GNEDINQSGHQRANLKMVSNEHESQSNI    | 187 |
| CDC23_HUMAN | 150 | -A-LRELRL--VELS-K-K---HQARELDGFG-LYLY--GVVLR--KLDLV   | 185 |
| CDC23_YEAST | 188 | SSILKEINTFLE-SYEIKIDDDDEA-DL-GLALLY-YLRGVILKQEK-NIS   | 232 |

|             |     |                                                    |     |
|-------------|-----|----------------------------------------------------|-----|
| CDC23_HUMAN | 186 | KEAIDVFVEATHVPLPLHWGAWLEL--CNL--ITD---KEML-----KF  | 221 |
| CDC23_YEAST | 233 | K-AMSSFLKSLSCYSFNWSCWLELMDC-LQKVDALLLNNYLQNFQFKF   | 280 |
| CDC23_HUMAN | 222 | LS--L-PD-T--W--M-KEFF-LAHYIYTEL--QLIE---EALQKYQNLI | 256 |
| CDC23_YEAST | 281 | -SENLSQRTIEFNIMIK-FFKL-KVFEELNGQL-EDYFEDLE-F--LLQ  | 323 |
| CDC23_HUMAN | 257 | V--GFS--KSSYIVSQIA-VAYHNIRD-IDKALSIFNELRKQDPYRIEN- | 299 |
| CDC23_YEAST | 324 | VFPNFTFLK-AY--N--ATISYNNL-DYV-TAESRFDDIVKQDPYRL-ND | 365 |
| CDC23_HUMAN | 300 | MDTFSNLLYVRSM-K-SELSYLAHLNCEIDKYRVETCCVIGNYSLRSQH  | 347 |
| CDC23_YEAST | 366 | LETYSNLIYV--MQKNSKLAYLAQFVSQIDRFRPETCCIIANYYSARQEH | 413 |
| CDC23_HUMAN | 348 | EKAALYFORALKLNPRYLGAWTLMGHEMEMKNTSAAIQAYRHAIEVNKR  | 397 |
| CDC23_YEAST | 414 | EKSIMYFRRALTLDKKTTNAWTLMGHEFVELSNSHAAIECYRRAVDICPR | 463 |
| CDC23_HUMAN | 398 | DYRAWYGLGQTYEILKMPFYCLYYRRHQLRPNDSRM-LVALGECYEKL   | 446 |
| CDC23_YEAST | 464 | DFKAWFGLGQAYALLDMHLYSLYFQKACTLKPWDRRIWQV-LGECYSKT  | 512 |
| CDC23_HUMAN | 447 | -NQLVEAKKCYWRAY-A---VGDVEKMAL-VKLAKLHEQLTESE-QAAQC | 489 |
| CDC23_YEAST | 513 | GNK-VEAIKCYKRSIKASQTV-D-QNTSIYRRLAQLYEEL-E-DLQ--EC | 555 |
| CDC23_HUMAN | 490 | --Y-IKYIQDIYSCGEIVEHL--EEST--AFR-YLAQYF--KC---KL-  | 525 |
| CDC23_YEAST | 556 | KKFMMKCV-DV-E--ELLEGIVTDE-TVKA-RLWLA--IFEIKAGNYQLA | 597 |
| CDC23_HUMAN | 526 | WDEA----S-TCAQKCCAFNDTREETKALLRQILQLRN             | 558 |
| CDC23_YEAST | 598 | YDYAMGVSSGT-SQ-----EI-EEARMLARE-CR-RH              | 625 |

Name 1: PANK2\_HUMAN  
Name 2: P91029\_CAEEL

Pantothenate kinase 2, mitochondrial OS=Homo sapiens GN=PANK2 PE=1 SV=3  
Pantothenate kinase protein 1, isoform a, confirmed by transcript evidence OS=Caenorhabditis elegans GN=pnk-1 PE=2 SV=2

Needed for following interaction(s):

|              |            |             |      |       |             |
|--------------|------------|-------------|------|-------|-------------|
| worm genetic | RASK_HUMAN | PANK2_HUMAN | KRAS | PANK2 | LET60_CAEEL |
| P91029_CAEEL |            |             |      |       |             |

Length sequence 1: 570  
Length sequence 2: 449  
Sequence #1: PANK2\_HUMAN  
Sequence #2: P91029\_CAEEL  
Length #1: 604  
Length #2: 604  
Matrix: BLOSUM62  
Gap open: 2.0  
Gap extend: 1.0  
Length: 604  
Identity: 209/604 (34.60%)  
Similarity: 290/604 (48.01%)  
Gaps: 214/604 (35.43%)  
Score: 827.00

|              |     |                                                    |     |
|--------------|-----|----------------------------------------------------|-----|
| PANK2_HUMAN  | 22  | GLHRLFLRGTRIPSSSTTLSPRHDLSLSDGGTVNPPRVREPTGREAFGP  | 71  |
| P91029_CAEEL | 2   | G-H-----TSVTSRRIS-PR-----G--SPPNLR-R-T-----P       | 25  |
| PANK2_HUMAN  | 72  | SPASSDWLPARWR---NGRGGPRARLCSGWTA-EEARRNPTLGGLLG    | 116 |
| P91029_CAEEL | 26  | -P--K--I--R-KVLVL--R--EKRA-----AATED--Q-----IM-    | 47  |
| PANK2_HUMAN  | 117 | RQRLLLRMGGRGAPMERHGRA-SAT-SVSSAGEQ--AAGD--PEGRRQ   | 160 |
| P91029_CAEEL | 48  | -DDLLL---SSKL-----K--RVDSATGSVS---PRVCAA-DALP---TT | 79  |

|                                                                                       |          |                                                      |             |          |       |
|---------------------------------------------------------------------------------------|----------|------------------------------------------------------|-------------|----------|-------|
| PANK2_HUMAN                                                                           | 161      | EPLRRRASSASVPAVGASAEGRTR-DRLGSY--SGPVSQRQVESLRK-     | 206         |          |       |
| P91029_CAEEL                                                                          | 80       | TP---A--AST-AL---RQ-TQKAPKT-PYVIL-PAS---DTFEKFRKT    | 113         |          |       |
| PANK2_HUMAN                                                                           | 207      | KRPLFPWFGLDIGGTLVKLVYFEPKIDITAEVEEVEESLKS-IRKYLTSN   | 255         |          |       |
| P91029_CAEEL                                                                          | 114      | SR-V---SVDIGGTLIKVVY---SSV-MDEELPE-ESLNHGRTRY----    | 149         |          |       |
| PANK2_HUMAN                                                                           | 256      | VAYGSTGIRDVHLELKDLDLTLGCRKGNL-HFIRFPTHDMPAFI----QMGR | 300         |          |       |
| P91029_CAEEL                                                                          | 150      | -AY-----E--D-----GKR-VLVNFKKF-T-DMDRFINFLKEVWT       | 179         |          |       |
| PANK2_HUMAN                                                                           | 301      | D-KNFSS-LHTVFCATGGGAYKF-E---QDPLTIG-DLQLCKLDELDCLI   | 343         |          |       |
| P91029_CAEEL                                                                          | 180      | DRKR-GDVIH---C-TGGGSYKYSEIIMKE-L--GVRLQ--RTDEMRSLI   | 219         |          |       |
| PANK2_HUMAN                                                                           | 344      | KGI--LY---ID-SVGFNGRSQCYFENPA-DSEKQ-KLPF--DLKNPY     | 383         |          |       |
| P91029_CAEEL                                                                          | 220      | FGVNFLLSTNVDES--F---T--YHHD--AIGRNKQYR-PIAADL--IY    | 257         |          |       |
| PANK2_HUMAN                                                                           | 384      | PLLLVNIHSGVSIILAVYSKDNRYKRVGTSLGGGTFPGLCLLTGCTTFEE   | 433         |          |       |
| P91029_CAEEL                                                                          | 258      | PFLLVNIGTGISILKVDSPYSYERVGGSSMGGTFMGLGSLTTPAQNFDE    | 307         |          |       |
| PANK2_HUMAN                                                                           | 434      | ALEMASRGDSTKVDKLVLDIYGGDYERFGLPGWA--VASSFGNMSK---    | 478         |          |       |
| P91029_CAEEL                                                                          | 308      | LLEMANRGDHRNVDKLVCDIYGGAYDELGLK--ADLIA--GS-MAKCNR    | 351         |          |       |
| PANK2_HUMAN                                                                           | 479      | --E--KREAVSK-EDLARATLITITNIGSIARMCA-L--NE-NINQVVF    | 519         |          |       |
| P91029_CAEEL                                                                          | 352      | FEEETTKKQQ-HKPEDIAKSLLLMVSNNIG---QM-AYLYGTRYNLKRIFY  | 396         |          |       |
| PANK2_HUMAN                                                                           | 520      | VGN-FLRINTIAMRLLAYALDYWSKGLKALFSEHEGYFPAVAVGALL-E--  | 565         |          |       |
| P91029_CAEEL                                                                          | 397      | -GGYFIRQDPITMRTLFAINYWSKGEIEALYLKHEGYLGAMGSFLDEDDG   | 445         |          |       |
| PANK2_HUMAN                                                                           | 566      | LLKI                                                 | 569         |          |       |
| P91029_CAEEL                                                                          | 446      | --KL                                                 | 447         |          |       |
| -----                                                                                 |          |                                                      |             |          |       |
| Name 1: H15_HUMAN                                                                     |          |                                                      |             |          |       |
| Name 2: H1_YEAST                                                                      |          |                                                      |             |          |       |
| Histone H1.5 OS=Homo sapiens GN=HIST1H1B PE=1 SV=3                                    |          |                                                      |             |          |       |
| Histone H1 OS=Saccharomyces cerevisiae (strain ATCC 204508 / S288c) GN=HHO1 PE=1 SV=1 |          |                                                      |             |          |       |
| Needed for following interaction(s):                                                  |          |                                                      |             |          |       |
| yeast                                                                                 | physical | H15_HUMAN                                            | MUS81_HUMAN | HIST1H1B | MUS81 |
| H1_YEAST                                                                              |          | MUS81_YEAST                                          |             |          |       |
| Length sequence 1:                                                                    |          | 226                                                  |             |          |       |
| Length sequence 2:                                                                    |          | 258                                                  |             |          |       |
| Sequence #1:                                                                          |          | H15_HUMAN                                            |             |          |       |
| Sequence #2:                                                                          |          | H1_YEAST                                             |             |          |       |
| Length #1:                                                                            |          | 281                                                  |             |          |       |
| Length #2:                                                                            |          | 281                                                  |             |          |       |
| Matrix:                                                                               |          | BLOSUM62                                             |             |          |       |
| Gap open:                                                                             |          | 2.0                                                  |             |          |       |
| Gap extend:                                                                           |          | 1.0                                                  |             |          |       |
| Length:                                                                               |          | 281                                                  |             |          |       |
| Identity:                                                                             |          | 99/281 (35.23%)                                      |             |          |       |
| Similarity:                                                                           |          | 130/281 (46.26%)                                     |             |          |       |
| Gaps:                                                                                 |          | 81/281 (28.83%)                                      |             |          |       |
| Score:                                                                                |          | 344.00                                               |             |          |       |
| H15_HUMAN                                                                             | 1        | MSETAP--AETATPAPVE-KSPA--K-K-KATKAA-GAGAAKR-KATGP    |             |          | 41    |
| H1_YEAST                                                                              | 1        | M---APKSTTKTTS--KGKPKATSKGKEKSTSKAAIKKTTAKKEEASSK    |             |          | 45    |
| H15_HUMAN                                                                             | 42       | PVS--ELITKAVAASKERNGLSLAALKK-----AL--AAGGYDVEKNNS    |             |          | 81    |

|                                                                                                                    |         |                                                     |             |      |       |            |
|--------------------------------------------------------------------------------------------------------------------|---------|-----------------------------------------------------|-------------|------|-------|------------|
| H1_YEAST                                                                                                           | 46      | --SYRELIIEGLTALKERKGSRRPALKKFKIKENYPIVGSASNFDFYFNNA | 93          |      |       |            |
| H15_HUMAN                                                                                                          | 82      | RIKLGKLSLVSKGTLVQTKGTGASGSFKLNKKAASGEAKPKAKKAGAAKA  | 131         |      |       |            |
| H1_YEAST                                                                                                           | 94      | -IK--KG-VEAGDFEQPKGP-A-GAVKLAKEV-KEKEV-SPKP         | 133         |      |       |            |
| H15_HUMAN                                                                                                          | 132     | KKPA---GATPKKAKKAAG---A-KKAV-KKTP---KKAKKPAAGVKK    | 169         |      |       |            |
| H1_YEAST                                                                                                           | 134     | KQAATSVSATASKA-KAASKTCLAPKVVKKKSPVTAKKASSPSSTLYKE   | 182         |      |       |            |
| H15_HUMAN                                                                                                          | 170     | -VAKS-PK---K--AKAAKPK--KATKSPAKPK-----AVKP          | 198         |      |       |            |
| H1_YEAST                                                                                                           | 183     | MILKSMPQLNDGKGSRIVLK-KYVKDTFS-SKLTSSNFDFYFNNSAIK-   | 229         |      |       |            |
| H15_HUMAN                                                                                                          | 199     | KAAC-PKAAKPKAAKPKA-AKAKKAAAKK-K                     | 226         |      |       |            |
| H1_YEAST                                                                                                           | 230     | KCVENGELVQPKG--PSGIKLNK---KKVK                      | 255         |      |       |            |
| -----                                                                                                              |         |                                                     |             |      |       |            |
| Name 1: UBP10_HUMAN                                                                                                |         |                                                     |             |      |       |            |
| Name 2: UBP3_YEAST                                                                                                 |         |                                                     |             |      |       |            |
| Ubiquitin carboxyl-terminal hydrolase 10 OS=Homo sapiens GN=USP10 PE=1 SV=2                                        |         |                                                     |             |      |       |            |
| Ubiquitin carboxyl-terminal hydrolase 3 OS=Saccharomyces cerevisiae (strain ATCC 204508 / S288c) GN=UBP3 PE=1 SV=1 |         |                                                     |             |      |       |            |
| Needed for following interaction(s):                                                                               |         |                                                     |             |      |       |            |
| yeast                                                                                                              | genetic | RASK_HUMAN                                          | UBP10_HUMAN | KRAS | USP10 | IRA2_YEAST |
| UBP3_YEAST                                                                                                         |         |                                                     |             |      |       |            |
| Length sequence 1:                                                                                                 |         | 798                                                 |             |      |       |            |
| Length sequence 2:                                                                                                 |         | 912                                                 |             |      |       |            |
| Sequence #1:                                                                                                       |         | UBP10_HUMAN                                         |             |      |       |            |
| Sequence #2:                                                                                                       |         | UBP3_YEAST                                          |             |      |       |            |
| Length #1:                                                                                                         |         | 1031                                                |             |      |       |            |
| Length #2:                                                                                                         |         | 1031                                                |             |      |       |            |
| Matrix:                                                                                                            |         | BLOSUM62                                            |             |      |       |            |
| Gap open:                                                                                                          |         | 2.0                                                 |             |      |       |            |
| Gap extend:                                                                                                        |         | 1.0                                                 |             |      |       |            |
| Length:                                                                                                            |         | 1031                                                |             |      |       |            |
| Identity:                                                                                                          |         | 302/1031 (29.29%)                                   |             |      |       |            |
| Similarity:                                                                                                        |         | 452/1031 (43.84%)                                   |             |      |       |            |
| Gaps:                                                                                                              |         | 357/1031 (34.63%)                                   |             |      |       |            |
| Score:                                                                                                             |         | 1100.00                                             |             |      |       |            |
| UBP10_HUMAN                                                                                                        | 1       | MAHSPQYIFGDFSPDE-FNQFFVTPR-SSVELPPYSGTVLCGTQAVDKL   |             |      |       | 48         |
| UBP3_YEAST                                                                                                         | 1       | MNM--Q---DANKEESYSY---PKTSS---PP-PPT---PTN-M-QI     |             |      |       | 31         |
| UBP10_HUMAN                                                                                                        | 49      | PDGQEQYR-IE-FGVDEVIEPSDTL-PRT--PSYS---ISSTLN-P---Q  |             |      |       | 86         |
| UBP3_YEAST                                                                                                         | 32      | P---IYQAPLQMYGYTQA--P--YLYP-TQIPAYSFNMVNQ--NQPIYHQ  |             |      |       | 71         |
| UBP10_HUMAN                                                                                                        | 87      | --APEFI-----L--GCTA--SKIT-----PDGIT-KEASYGSIDCQ---  |             |      |       | 116        |
| UBP3_YEAST                                                                                                         | 72      | SGSPHLLPPQNNINGGSTTNNNNINKKWHNSNGITNNNGSSGN---QGAN  |             |      |       | 118        |
| UBP10_HUMAN                                                                                                        | 117     | YPGSALALDGS-----SN--VE--AEVLENDGVS-GGLGQRE-RKK--    |             |      |       | 151        |
| UBP3_YEAST                                                                                                         | 119     | SSGSGMSYNKSHTYHHNYSNNHIPMMAS--PNSG-SNAGM-KKQNTSSNG  |             |      |       | 164        |
| UBP10_HUMAN                                                                                                        | 152     | --KKRPPGY--Y---S-Y-L-K-DGGDDISSTEALVNHANSA--V--P    |             |      |       | 186        |
| UBP3_YEAST                                                                                                         | 165     | NGSSATSPSYSSYNSSQYDLYKFD----V-TK-LKLNKENSNNLQLP     |             |      |       | 207        |
| UBP10_HUMAN                                                                                                        | 187     | ---NSVSAEDAEMGDMPPSVTPR-----TCNSP--QNSTDSV--SD      |             |      |       | 221        |
| UBP3_YEAST                                                                                                         | 208     | LFIN--TTE-AEFAA---ASV-QRYELNMKALNLSSELSNS--SVEKSS   |             |      |       | 248        |
| UBP10_HUMAN                                                                                                        | 222     | I---VPD-SPFPALGSD--TRTAGQPEGGPGA-DFGQSCFPAAEAGRDT-  |             |      |       | 263        |
| UBP3_YEAST                                                                                                         | 249     | AHHHTKSHS-IP-KHNEEVKTETHGEEE---DAHD--KK--P-HASKDAH  |             |      |       | 288        |
| UBP10_HUMAN                                                                                                        | 264     | -L-SRTAGAQCVCV-GTDTTENLGVANGQILESSGEGTATNGVELHTTESI |             |      |       | 310        |

```

UBP3_YEAST      289 ELK KKT---E--VKKEDAKQD---RNEKVIQ---EPQAT--V-L---PV      320
UBP10_HUMAN     311 DLDPTK-P-ESASPPADGTGSASGTLVPSQP--KSWASLFHD---SKPSS      353
UBP3_YEAST      321 -VD-KKEPEESVE---ENTSKTSSPSP-SPPAAKSWSAIASDAIKSRQAS      364
UBP10_HUMAN     354 ----S-S-----PV----AYV-ETKYSPPA-I----SPLVSEKQVEVKE-      382
UBP3_YEAST      365 NKTVSGSMVMTKTPISGTTAGVSSSTNMA-AATIGKSSSPLLS-KQPQKDKD      412
UBP10_HUMAN     383 GLVPVS-E--DP---VAIK-----IAELLEN--VTLIHK-PV-SLQPR      415
UBP3_YEAST      413 KYVPPSTKGIIEPLGSIALRMCFDPDFISYVLRNKDVE--NKIPVHSIIPR      460
UBP10_HUMAN     416 GLINKGNWCYINATLQALVACPPMYHLMKFIPLYS-K-V-QRPCTST-PM      461
UBP3_YEAST      461 GIINRANICFMSSVLQVLLYCKPFIDVIN-V-L-STRNTNSRVGTSSCKL      507
UBP10_HUMAN     462 IDSFVRL-M-NEFTNMPVPPKPR--Q-ALGD--KIVR-DIRPGA---AFE      500
UBP3_YEAST      508 LDA-C-LTMYKQF-DKETYEK-KFLENA-DDAEKTTESDAKSSKSKSFQ      552
UBP10_HUMAN     501 -----P-TYIYRLL-TVNK-SSLSEKGRQEDAE EYLGFI LNLGHEE      538
UBP3_YEAST      553 HCATADAVKPDFEYKTLSTIPKFKDL-QWGHQEDAE EFLTHLLDQLHEE      600
UBP10_HUMAN     539 M-----L-N-LKKLLSPS-N-EKL-T--ISN---GP----KNHSVNE      566
UBP3_YEAST      601 LISAI DGLTDNEIQNMLQ-SINDEQLKVFVIRNLSRYGKA EFKNNSPRL      649
UBP10_HUMAN     567 EEQ-EEQG---EGS-EDE-WEQV-G--PR-NKTSVT---ROADFVQTPIT      603
UBP3_YEAST      650 KELIEKYGVINDDSTEENGWHEVSGSSKRGKTK-TAAKRTVEIVPSPIS      698
UBP10_HUMAN     604 GIFGGHIRSV--VYQSSKES-A-TLQPF TQLDQSDKIRTVQDALES      649
UBP3_YEAST      699 KLFGGQFRSVDLI--PNNKESQISITLDPFQTIQLDI-SD--AGVND-LET      742
UBP10_HUMAN     650 LVA-RE-SVQGYTT---KTK--QEVEISRRVT-LEKLPVPLVHLKRF--F      689
UBP3_YEAST      743 --AFKFS-E-YELLPFKSSSGNDVE-AKKQTFIDKLPQVLLIQFKRFSF      787
UBP10_HUMAN     690 V--YEK---T-----GG-CQKLI-KNIEYPVDLEISKELLSPGV--KNK      724
UBP3_YEAST      788 INN VNKNAMTNYNAYNGRIEK-IRKKIKYGHელი IPEESMS-SITLKN-      834
UBP10_HUMAN     725 N---FKCHRTYRLFVAVYHHGNSATGGHYTTDFVQIGLNGWLRIDDQTVK      771
UBP3_YEAST      835 NTSGID-DRRYKLTGVYHHGVSDDGGHYTADVYHSEHNKWRIDD--VN      881
UBP10_HUMAN     772 VINQYQ---VVK--PTA-E-RTAY-LLYYRR      794
UBP3_YEAST      882 -ITELEDDDLVKGEEASDSRTAYILMYQKR      911

```

```

-----
Name 1: GCN1L_HUMAN
Name 2: GCN1_YEAST

Translational activator GCN1 OS=Homo sapiens GN=GCN1L1 PE=1 SV=6
Translational activator GCN1 OS=Saccharomyces cerevisiae (strain ATCC 204508 / S
288c) GN=GCN1 PE=1 SV=1

Needed for following interaction(s):
yeast genetic GCN1L_HUMAN RASK_HUMAN GCN1L1 KRAS GCN1_YEAST
IRA2_YEAST

Length sequence 1: 2671
Length sequence 2: 2672
Sequence #1: GCN1L_HUMAN
Sequence #2: GCN1_YEAST
Length #1: 3101
Length #2: 3101
Matrix: BLOSUM62

```

```

Gap open: 2.0
Gap extend: 1.0
Length: 3101
Identity: 1023/3101 (32.99%)
Similarity: 1618/3101 (52.18%)
Gaps: 880/3101 (28.38%)
Score: 4239.00

GCN1L_HUMAN      1 MAA-----DTQVSETLKRFGAKVTTAS-VKER----REILSELGKCVAGK      40
GCN1_YEAST       1 MTAILNWED--ISPVLEK--G--TRESHVSKRVPFLQDI-SQL---VR-Q      39
GCN1L_HUMAN     41 D-L-L-P---EGA-VKGLCKLFC LTLHRYRDAASR-RALQAAIQQLAE---      79
GCN1_YEAST       40 ETLEKPLQSEIAFV--LLNTF--TI--YED--NRSKSLVTSI--LLDILN      79
GCN1L_HUMAN     80 AQPEATAKNLLHSLQSS-GIGSKAGVP-SKSSGSA--L-LALTWTCLLV      124
GCN1_YEAST       80 LEP-CLENFIRFI-SDVVI-SN---PATK---AVADYLN-LDW----I      115
GCN1L_HUMAN     125 R--IVFPSRAKROGDIWNKLV--V-QCLLL-----LE-VL-G---G      156
GCN1_YEAST       116 NSFLIFVS---HNS--N-LFEEYIPK-LLVAHSYATFGVETILDNQEEG      157
GCN1L_HUMAN     157 --S-----H-K---HAV-DGAVKK-LTK-LWKENPGLVEQYLS-AILS-      189
GCN1_YEAST       158 KKSQDKQQRKRIRYICIFQTTVKAFL-KCL-KDNDDSI-SFMKISIKTV      204
GCN1L_HUMAN     190 LEPNQYA-----G--M-LGLLVQFCTSHKEMDVVS-Q---H---K--      220
GCN1_YEAST       205 LE---SYSKLKITSVGVVMIMGALTQ--AA---LQLLRQPALHSVLKEN      246
GCN1L_HUMAN     221 SALLD-F--YM-KNILMSKV KPP-KYLLD-SCAPLLR-YLHSHSE-F-KDL      261
GCN1_YEAST       247 SA--EKYCEYLKGEVFLGK-NPPSSFCLEIGLKPFLKEFVS-QELFIK-F      291
GCN1L_HUMAN     262 ILPTIQKSLRSPE---NVI-E--T-IS---SLL---ASVTLDSLQY--      295
GCN1_YEAST       292 FIPNIEKAVLRSPEVGF S ILS ELYAGVSPEKVNLLNAFASSKL-INQYFS      340
GCN1L_HUMAN     296 ----AMDIVKGLAGHLKSN SPRLMDEAVLALRNLARQCS DSSAMESLTK-      340
GCN1_YEAST       341 SFKSSKEVVRVSVS--LQS-----M--IIL-LRKISN--TDTT-LEDLTKL      377
GCN1L_HUMAN     341 --HLFA-I---LGGSEGLTVVAQKMSVLSGIGSV--SHHVSGPSSQVL      382
GCN1_YEAST       378 IDEIFKNIKSNL-NADYK-SLIS-K--IL--I-EIPLTHYEV--SEKIC      416
GCN1L_HUMAN     383 NGIVAELFIPFLQQEVHEG--TL-----VHAVSV--LA-LWCNR----      416
GCN1_YEAST       417 KGL-S---PYIGKEGNEAAL TMLNAFFVHYFSLGKPIEDL--DKIISA      459
GCN1L_HUMAN     417 -FTMEVP--KKLTEWFKKAFSLK TSTSAVRHAYLQCMLAS YGDTLLQAL      463
GCN1_YEAST       460 GFADKKPALKKC--WF-AAF-L--NNS---NA-----AS-E-EVILNFI      492
GCN1L_HUMAN     464 DLLPLLIQTVEKAASQSTQVPTI---TEGVAAALL--L-L--KLSVA-DS      504
GCN1_YEAST       493 D--GCL-EFV-K---DS--I--IHYQTHG-HACILASIEFTNKI-LALDN      529
GCN1L_HUMAN     505 QAEAKLSS-FWQLIVDEKKQVFT-SEKFLVMAS-EDALCT-VLHLTERLF      550
GCN1_YEAST       530 -TE--LNDRVMLI--E-----TLPEN----SSIGDAILTAALS-TE-LS      563
GCN1L_HUMAN     551 LDHP-HRLTGNKVQV--YHR-ALV--AVL--LSRTHVHR-R-Q--AQO-      586
GCN1_YEAST       564 IENRIHAV--NLLQELFYKKEPFI GFSVIDAIER----RMRVQELIPQQN      607
GCN1L_HUMAN     587 TVRKLSSSLGGFKLAHGLLEELKTVLSSHKVLPLEALVTDAGEVTEAGKA      636
GCN1_YEAST       608 T-----S--FK--Y-----V-TS--VL-L-A-IT-----SE-----      623
GCN1L_HUMAN     637 YVPPRVLQEA LCVISGVPGLKGDVTDTEQL--AQEMLIISHHPSLVAVQS      684

```

|             |      |                                                      |      |
|-------------|------|------------------------------------------------------|------|
| GCN1_YEAST  | 624  | -LPDK---EA---S---IK--V-----LINA---LVIAQW-NIFNIKN     | 650  |
| GCN1L_HUMAN | 685  | GLWPA-LLARMKIDP-EAFITRH----LDQIIPRMTTQS-P-LNQSSM-N   | 725  |
| GCN1_YEAST  | 651  | G-W-AGLVLRLRDLPAEV-VKEHASVIMEKIL-EI-TGSCWID--TIYG    | 693  |
| GCN1L_HUMAN | 726  | AMGSL-----SVLSPDRVLPQLISTITASVQNPA--L-RLVTREEFAIM    | 766  |
| GCN1_YEAST  | 694  | ACG-LQAAAYAAFIQPNFTPIILCKTIEADL--TADDFSRSL-SEEDFEIF  | 739  |
| GCN1L_HUMAN | 767  | QTPAGE---L-YDKSIIQSAQQDSI-KK-ANMKREN-KAYSFKQII-EL    | 808  |
| GCN1_YEAST  | 740  | ---AGEEGLVVD--VL---EESMNKLSN-K--NSKEY---ETLMWEQ      | 774  |
| GCN1L_HUMAN | 809  | EL-KEEIKK--KKGK-KEEVQ-LTSKQ--KE-MLQALDREAQVR-RR-L    | 848  |
| GCN1_YEAST  | 775  | KIRKEQAKKNVKK-LSKEE-QELVNEQLAKESAVRSHVS-EISTRKIRGI   | 821  |
| GCN1L_HUMAN | 849  | QELDGL-EEAALGLLDIILAKNPSGL-TQYIPVLVDSFPL-LKS-P-LA    | 893  |
| GCN1_YEAST  | 822  | R-LVSELSKAA--CL--V--QN--GIAT-WFPLAVTK-L-LYLCSEPNIS   | 859  |
| GCN1L_HUMAN | 894  | --APRIKPNFLSLAACVMPS-RL---KA-LGTLVSHVTLRLKPECVLDK    | 936  |
| GCN1_YEAST  | 860  | KLTEEDVNVNVLQLSQNV--SERLGNIRLFLG-L---ATLRVHNANGI-SQ  | 902  |
| GCN1L_HUMAN | 937  | SWCEELSVAVKRAVMLLHTHTITSRVGK---GEPGAAPLSAPAFSL--V    | 981  |
| GCN1_YEAST  | 903  | DYLQEP--VE---LL--TR-VLFRI-KFVSNQ--AA-ID--SISLTYI     | 937  |
| GCN1L_HUMAN | 982  | FPFL-----KMW-L--TEMP----HH-SE-EEEE--WMAQILQILTVQ     | 1013 |
| GCN1_YEAST  | 938  | LPLLINLVLEKGAIALKNADKPVVKAEFVEDEEEHLLLA--MEIISVH     | 985  |
| GCN1L_HUMAN | 1014 | AQLRASPNTPPGRVDENGPELLPRVAMLR-LLTWVIGTGS-P-RLQVLAS   | 1060 |
| GCN1_YEAST  | 986  | AE--A-----F-ED-PS-IPRISIVEVLLS-LL---SLPSKAKI-AK      | 1017 |
| GCN1L_HUMAN | 1061 | DTLTTLCASSGDDGCAFAEQEEVDVLLCALQSPCAS--VRETVLRGLME    | 1108 |
| GCN1_YEAST  | 1018 | DCFNALCQSIS---VA-PNQEDLDMILSNLLSP--NQFVRSITL----E    | 1056 |
| GCN1L_HUMAN | 1109 | LHMVLPAPPTD-EKNGLN-LLR---RLVWVKFDEKEEIRKLAERLW--S-   | 1150 |
| GCN1_YEAST  | 1057 | ---TL---DNEFE---LEPFMKYSPEVFCRFDSDPSNREIADFIWEFNK    | 1097 |
| GCN1L_HUMAN | 1151 | -MMGLD-LQPDLCSL--LI--DD--V-IYHEAAVRQA-GAEAL--SQAVA   | 1188 |
| GCN1_YEAST  | 1098 | FVVN-DEL---LKSFLPLFNQDDSGLRLF--AANAYAFGAVSLFTSE---   | 1138 |
| GCN1L_HUMAN | 1189 | RYRQAAEVMGRLEMEIYQEKLYRP-PPVLDALGRV-ISES-PPDQWEARC   | 1235 |
| GCN1_YEAST  | 1139 | --ENSSKDYLDNLLNFYKEKA-KPLEPILDQFGLVLVSASEQKDPWQGRS   | 1185 |
| GCN1L_HUMAN | 1236 | GLALALNK-LSQ-Y-L-DSSQVKPLQFFVFPD-ALNDRHPDVRKCMLEDA   | 1280 |
| GCN1_YEAST  | 1186 | TVAITL-KIMAKAFSAEDDTVVN-IKFLVDDGGLVDREPIVQEMKEAG     | 1233 |
| GCN1L_HUMAN | 1281 | --LATLNTHGKENVNSLLPVFEEFLKNAPNDASYDAVRQSVVVLMSGSLAK  | 1328 |
| GCN1_YEAST  | 1234 | VELITL--HGSQNSKDLIPIFEALSSS-TD-S--ALKENVIIILYGTLAR   | 1277 |
| GCN1L_HUMAN | 1329 | HLDKSDPKVKPIVAKLIAALSTPSQQVQESVASCLPPLVPAIKEDAG---   | 1375 |
| GCN1_YEAST  | 1278 | HLQQSDARIHITIIRLLSLDTPSADIQQAVSACIAPLVFQFKQKVGDYL    | 1327 |
| GCN1L_HUMAN | 1376 | GMIQRLMQQLLESQKAE--RKGAAAGLAGLVKGLGILS-LKQEMMAAL     | 1422 |
| GCN1_YEAST  | 1328 | G-I--LMEKLL-NPTVASSMRKGAAGWGIAGLVKGYGI-SALSEFDIIRNL  | 1372 |
| GCN1L_HUMAN | 1423 | TDAIQDKKNFRRE--GALFAFEMCLTMLGKLFEPYVVHVLPHLL--LCF    | 1468 |
| GCN1_YEAST  | 1373 | IEAAEDKKEPKRRRESVG--FCFQYLSSESLGKFFEPYVIEILPNILKNL-- | 1418 |

|             |      |                                                      |      |
|-------------|------|------------------------------------------------------|------|
| GCN1L_HUMAN | 1469 | GDG-NQYVREA-ADDCA-KAVMSNLSAHGV-KLVLPSSLA-A-LEEESWR   | 1512 |
| GCN1_YEAST  | 1419 | GDAVPE-VRDATAR--ATAKAIMAHTTGYGVKKLI-P--VAVSNLDEIAWR  | 1462 |
| GCN1L_HUMAN | 1513 | TKAGSVELLGAMAYCAPKQLSSCLPNIVPKLTEVLTDSHVK-VQKAGQQA   | 1561 |
| GCN1_YEAST  | 1463 | TKRGSVQLLGNMAYLDPTQLSASLSTIVPEIVGLVNDSH-KEVRKADES    | 1511 |
| GCN1L_HUMAN | 1562 | LRQIGSVIRNPEI--LAIAPVLLDALDPSRK-TQKCLQTLTDFKVFHFI    | 1608 |
| GCN1_YEAST  | 1512 | LKRFGVEVIRNPEIQKL-V-PVLLQAIGDPT-KYTEEALDSLITQFVHYI   | 1558 |
| GCN1L_HUMAN | 1609 | DAPSLALIMPVQRAFQDRSTD-TRKMAAQIIGNMYS-LTDQKDLAPYLP    | 1656 |
| GCN1_YEAST  | 1559 | DGPSLALIHIHHRGMHDRSANIKRK-ACKIVGNM-AILVDTKDLIPYLO    | 1606 |
| GCN1L_HUMAN | 1657 | SVTPGLKASLLDPVPEVR-TVSAKALGAMVKGMGESCFEDLLPWLMTLT    | 1705 |
| GCN1_YEAST  | 1607 | QLIDEVEIAMVDPVNTTRAT-AARALGALVERLGEQFDPILPRLDITLS    | 1655 |
| GCN1L_HUMAN | 1706 | YEQS-SVDRSAAQGLAEVMAGLVGVEKLEKLMPEIVA--TAS-KVDIAPH   | 1751 |
| GCN1_YEAST  | 1656 | -DESKSGDRLGSQAALAEVISGLGLTKLDEMLPTILAGVT-NFR--A-Y    | 1699 |
| GCN1L_HUMAN | 1752 | VRDGY--IMMFNYLPITFGDKFTPYVGPPII-PCILKALA--DENEFRDRT  | 1796 |
| GCN1_YEAST  | 1700 | IREGFMPLLLF--LPVCFGSQFAPYINQIIQP-ILSGLADNDEN--IRDT   | 1744 |
| GCN1L_HUMAN | 1797 | ALRAGQRVISMYAET-AIALLLPQLEQGLFD--DLWRIRFSSVQLLDGLL   | 1843 |
| GCN1_YEAST  | 1745 | ALKAGKLVKNYA-TKAVDLLPELGERGMFDEND--RIRLSSVQLTGELL    | 1791 |
| GCN1L_HUMAN | 1844 | FHISGVTKMTTETASED-D-NFGTAQ-SNKAIITAGVERRNRVLAGLY     | 1890 |
| GCN1_YEAST  | 1792 | FQVTGISSR--NEFSEEDGDHN-G--EFSGK-LVDVLGQDRDRRILALF    | 1835 |
| GCN1L_HUMAN | 1891 | MGRSDTQLVVRQA-SLHVWIKVVSNTPTLREILPTLFGLLGLFLASTCA    | 1939 |
| GCN1_YEAST  | 1836 | VCRNDTSGIVR-ATTVDIWKALVPNTPRAVKEILPTLTGMIVTHLASS-S   | 1883 |
| GCN1L_HUMAN | 1940 | D-KRTIAARTLGDVLRKLGKELPEIIPILEEGL-RSQKSDERQGVCIGL    | 1987 |
| GCN1_YEAST  | 1884 | NVLRNIAAQTIGDLVRRVGGNALSQLLPSLEESLIETSNSDSRQGVCIAL   | 1933 |
| GCN1L_HUMAN | 1988 | SEIMKSTSRDAVLYFSES-LVPTARKALCDPLEE--VREAAAKTFE--QL   | 2032 |
| GCN1_YEAST  | 1934 | YELIESASTETISQF-QSTIVNIIRITALID--ESATVREAAALSDFVDFQ- | 1979 |
| GCN1L_HUMAN | 2033 | HSTIGHQALEDILPFLKQLD--DEEVSEFALDGLKQVMAIKSRVLPYL     | 2080 |
| GCN1_YEAST  | 1980 | -DVVGKTAVDEVLPYLLHMLESSDN--SDFALLGLQEIMSKKSDVIFPIL   | 2026 |
| GCN1L_HUMAN | 2081 | VPKLTTPPVNT-R--VLAFLSSVAGDALTRHLGVLPVAM-ALKEKLG      | 2126 |
| GCN1_YEAST  | 2027 | IPTLLAPPIDAFRASALGSLAEVAGSALYKRLSIIINA-LVDAI---IGT   | 2072 |
| GCN1L_HUMAN | 2127 | -PDE--Q--LEMANCQAVILSVEDDTG-HRIIEYLLLEATRSPVEGMRQA   | 2170 |
| GCN1_YEAST  | 2073 | SEDESTKGALELA-LDRVFLSVNDEGLHP-LLQQIMSLKSDNIEKR--     | 2118 |
| GCN1L_HUMAN | 2171 | AAII--L-NIYCSRSKADYTSHLRSLVS-GLIRLFNDSSP-VVLEESWDA   | 2215 |
| GCN1_YEAST  | 2119 | IAVLERLPNFF-DKTVLDFVYIPNFVSHAILSL-DDEDQRVV-NGNFNA    | 2165 |
| GCN1L_HUMAN | 2216 | LNAITKKLDAGNLALIEEL---HKE-IRLIGNESKGEHVPGFCLPKKGV    | 2261 |
| GCN1_YEAST  | 2166 | LSTLLKKVD---KPTL-EKLVKPAKQSLALTRGQ--QGDVAAPKLP-RGP   | 2208 |
| GCN1L_HUMAN | 2262 | TSILPV-LREGVLTGSPEQKEEAALG-LVIRLTSADA-LRPSVS-IT      | 2307 |
| GCN1_YEAST  | 2209 | NCVLPIFL-HGLMYGSDNEREESALAIADVSK-TPA-ANLKP-FVSVIT    | 2254 |
| GCN1L_HUMAN | 2308 | GPLIRILGDRFSWNVKAALLETLSLLAKVGIKALPFLPQLQTFKALQ      | 2357 |

|             |      |                                                      |      |
|-------------|------|------------------------------------------------------|------|
| GCN1_YEAST  | 2255 | GPLIRVVGGERFSSDIKAAILFALNVLFIKIPMFLRPFIPQLQRTFVKLSLS | 2304 |
| GCN1L_HUMAN | 2358 | D-SNRGVRKKAADALGKGLISIH-IKVDPLFTELLNGIR-AMEDPGVRDT-  | 2403 |
| GCN1_YEAST  | 2305 | DATNETLRLRAAKALGALIE-HQPRVDPLVIELVTGAKQA-TDEGVK-TA   | 2351 |
| GCN1L_HUMAN | 2404 | MLQA-LRFVVIQGAGAKV--DAVIRK-NIVSLL-LSMLGHDEDNTRISSA-  | 2447 |
| GCN1_YEAST  | 2352 | MLKALLE-VIMKAGSKLNENS---KTNIVNLVEEEMLG-SNDKLAIVAYAK  | 2396 |
| GCN1L_HUMAN | 2448 | --GCLGELCAFLTEEELSA--VLQOCLL-ADVSGIDWMVRHGRSLALSVA   | 2492 |
| GCN1_YEAST  | 2397 | LIGSLSEI---LSNDE--AHKILQDKVLNADLDG-E--T--GK-FAI-LT   | 2434 |
| GCN1L_HUMAN | 2493 | VN--V--APGRLCAGRYSSD-VQE-M--ILSSATADRIP-I--AVSG-V-   | 2529 |
| GCN1_YEAST  | 2435 | LNSFLK DAPTHI----FNTGLIDFVSYIL-NAI--RSPDVYFGNGTIA    | 2477 |
| GCN1L_HUMAN | 2530 | RG-MGFLM----RH-HIETGGGQLPAKL---S-SLFV----KC-LQNP-S   | 2563 |
| GCN1_YEAST  | 2478 | AGKL-LLEGEKRSFVVKDAAE-PFKIGDENINLLINELSKAVLQ-PAS     | 2524 |
| GCN1L_HUMAN | 2564 | -S-DIR---LV----AE-KM---I--WWANKDPL-PP----L-DPQAIK    | 2591 |
| GCN1_YEAST  | 2525 | NSTDVRRALVVRTLARFKFDECIKQYF---DVGPSVFSCLRDP-VI-      | 2569 |
| GCN1L_HUMAN | 2592 | PILKALLDNTKDKNTVVRAYSQAIIVNLLKMRQEE---VFQS-LSKILD    | 2637 |
| GCN1_YEAST  | 2570 | PI-K--L--AAEK-----AY----LA-LFKLVE-EDDMHTFNEWFAKISD   | 2603 |
| GCN1L_HUMAN | 2638 | VA-SLE-V-----LNEV---NRRSL-KKLASQADSTEQV---D-DTIL     | 2670 |
| GCN1_YEAST  | 2604 | RGNSIETVTGTIQLRSVGDYTKR-VGKRLAN-VE-RERIAAGGDAETMF    | 2650 |
| GCN1L_HUMAN | 2671 | T 2671                                               |      |
| GCN1_YEAST  | 2651 | S 2651                                               |      |

Name 1: KCC1G\_HUMAN  
Name 2: RAD53\_YEAST

Calcium/calmodulin-dependent protein kinase type 1G OS=Homo sapiens GN=CAMK1G PE=1 SV=3  
Serine/threonine-protein kinase RAD53 OS=Saccharomyces cerevisiae (strain ATCC 204508 / S288c) GN=RAD53 PE=1 SV=1

Needed for following interaction(s):  
yeast genetic KCC1G\_HUMAN PTTG1\_HUMAN CAMK1G PTTG1 RAD53\_YEAST  
SECU\_YEAST

Length sequence 1: 476  
Length sequence 2: 821  
Sequence #1: KCC1G\_HUMAN  
Sequence #2: RAD53\_YEAST  
Length #1: 660  
Length #2: 660  
Matrix: BLOSUM62  
Gap open: 2.0  
Gap extend: 1.0  
Length: 660  
Identity: 214/660 (32.42%)  
Similarity: 305/660 (46.21%)  
Gaps: 227/660 (34.39%)  
Score: 855.00

|             |     |                                                      |     |
|-------------|-----|------------------------------------------------------|-----|
| KCC1G_HUMAN | 4   | K---EED--D-C-SSWK---K--Q---T--T--N-I-RKT--F-IF--M-   | 26  |
| RAD53_YEAST | 152 | KQCLEQNKVDRIRSNLKNSTKIASPGLTSSSTASSMVANKTGIFKDFSIIID | 201 |
| KCC1G_HUMAN | 27  | EVLGSGAFSEVFLVK--QRLTGKLFALKCIKSPAF--RDSSLENEIAVL    | 72  |
| RAD53_YEAST | 202 | EVVQGQAFATV--KKAIERITGKTFVAVKIISKRKVIGNMD-GVTRLEVL   | 248 |

|             |     |                                                     |     |
|-------------|-----|-----------------------------------------------------|-----|
| KCC1G_HUMAN | 73  | KKIKHENIVTLEDIYESTTHYYLVMQLVSGGELFDRILERG-VYTEKDAS  | 121 |
| RAD53_YEAST | 249 | QKLNHPRIVRLKGFYEDTESEYYVMVEFVSGGDLMDFVAAHGAV-GE-DAG | 296 |
| KCC1G_HUMAN | 122 | LVI-QQVLSAVKYLHENGIVHRDLKPENLLYLTPPEENSKIM--ITDFGLS | 168 |
| RAD53_YEAST | 297 | REISRQILTAIKYIHSMGISHRDLKPNIL-I--EQDDPVLVKITDFGLA   | 343 |
| KCC1G_HUMAN | 169 | KMEQ-NG-IMSTACGTPGYVAPEVLAQK-----P-----YSKAVDCW     | 203 |
| RAD53_YEAST | 344 | KV-QGNGSFMKTFCGTLAYVAPEVIRGKDTSVSPDEYERNEYSSSLVDMW  | 392 |
| KCC1G_HUMAN | 204 | SIGVITYILLCGYPPFYEEETESKLFKEIKEG-YYEFESPFWDD--ISESA | 250 |
| RAD53_YEAST | 393 | SMGCLVYVILTGHLPPSGSTQDQLYKQIGRGSYH--EGPL-KDFRISEEA  | 439 |
| KCC1G_HUMAN | 251 | KDFICHLEKDPNERYTCEKALSHPWI--D--GNTALHRDIYPS-VSL-Q   | 294 |
| RAD53_YEAST | 440 | RDFIDSLQVDPNNRSTAALKALNHPWIKMSPLGSQS-YGD-F-SQISLSQ  | 486 |
| KCC1G_HUMAN | 295 | -I--QK---N-----FAKSKWR--QAFNAAAVVHMH---R--KLH-M     | 322 |
| RAD53_YEAST | 487 | SLSQQKLLNEMDDAQYEFVKAQ-RKLO-MEQQ--LQEQQEDQDGKIQGF   | 532 |
| KCC1G_HUMAN | 323 | NL--HSPGVR---P---EVENRPPETQ---ASETSR-PSSPE-----I    | 353 |
| RAD53_YEAST | 533 | KIPAHAP-IRYTPKSI EAETR--E-QKLLHSNNTENVKSSKKKGNRFL   | 578 |
| KCC1G_HUMAN | 354 | TITEAPVL-DHSVAL-PALTQLPCQHGRRP-TAPGGRS--LNCLV--NG-  | 395 |
| RAD53_YEAST | 579 | TL-K-P-LPD-SI-IQESL-EI--QQGVNPFPI--GRSEDCNCKIEDNRL  | 618 |
| KCC1G_HUMAN | 396 | S-LH--ISSSLVPMHQ-G-SL---AAG--P---C--GCCS-SCLN----   | 424 |
| RAD53_YEAST | 619 | SRVHCFIFKK---RHAVGKSMYESPAQLDDI WYCHTG-TNVSYLNNRM   | 664 |
| KCC1G_HUMAN | 425 | I-GSK-----G-----KSS-----Y---CSEPT-----L----         | 439 |
| RAD53_YEAST | 665 | IQGTFKLLQDGEIKI IWDKNNKFVIGFKVEINDTTGLFNEGLMGLQEQR  | 714 |
| KCC1G_HUMAN | 440 | --LKK-ANKKQNF--K-SEVMV-----PVKASGSS-HCR---AGQT---   | 470 |
| RAD53_YEAST | 715 | VVLKQTAEK-DELVKKLTQMAAQRANQP-SASSSSMSAKKPPVSDTNNN   | 762 |
| KCC1G_HUMAN | 471 | G---VC--LI 475                                      |     |
| RAD53_YEAST | 763 | GNNSVLNDLV 772                                      |     |

Name 1: APC10\_HUMAN  
Name 2: APC10\_YEAST

Anaphase-promoting complex subunit 10 OS=Homo sapiens GN=ANAPC10 PE=1 SV=1  
Anaphase-promoting complex subunit DOC1 OS=Saccharomyces cerevisiae (strain ATCC 204508 / S288c) GN=DOC1 PE=1 SV=2

Needed for following interaction(s):  
yeast physical APC10\_HUMAN PTTG1\_HUMAN ANAPC10 PTTG1 APC10\_YE  
AST SECU\_YEAST

Length sequence 1: 185  
Length sequence 2: 250  
Sequence #1: APC10\_HUMAN  
Sequence #2: APC10\_YEAST  
Length #1: 227  
Length #2: 227  
Matrix: BLOSUM62  
Gap open: 2.0  
Gap extend: 1.0  
Length: 227  
Identity: 75/227 (33.04%)  
Similarity: 112/227 (49.34%)  
Gaps: 84/227 (37.00%)  
Score: 341.00

|                                                                         |                  |                                                      |             |      |        |            |
|-------------------------------------------------------------------------|------------------|------------------------------------------------------|-------------|------|--------|------------|
| APC10_HUMAN                                                             | 5                | NKTPPGADPKQLE---RTGTVREI-GS-Q-----AVWSLSSCKP-GF-     | 40          |      |        |            |
| APC10_YEAST                                                             | 59               | N---P--TPENLQHMFMHQG-I-EILDSARMINVTHLALW----KPS5FK   | 96          |      |        |            |
| APC10_HUMAN                                                             | 41               | -G--VD-QLRDDNLETYWQSDGSQPH-LVNIQF-RRKTTVKTLICUYADYK  | 84          |      |        |            |
| APC10_YEAST                                                             | 97               | LGNPVDFAFAL-DDNYDTFWQSDGGQPHQL-DIMFSKR---M-DICVMAIFF | 140         |      |        |            |
| APC10_HUMAN                                                             | 85               | S---DESYTPSKISVRV--GNN-----FHNLQEIRQLELVEPSGWIHVPL   | 124         |      |        |            |
| APC10_YEAST                                                             | 141              | SMIADSEYAPS-L-VKVIYAGHSPSDARFYKMLEVRN---V--NGW--VAL  | 181         |      |        |            |
| APC10_HUMAN                                                             | 125              | --TDNHKKPTRTFMI--Q-IAVL--ANHQNGRDTHMRQIKIYTPV-E---   | 163         |      |        |            |
| APC10_YEAST                                                             | 182              | RFLDN-REDDQ--LLKQCFIRLLFPVNHENGGKDTHLRGIRLYVPSNEPHQ  | 228         |      |        |            |
| APC10_HUMAN                                                             | 164              | ---E--SSIGKFPCT-TI--DFMMYR                           | 182         |      |        |            |
| APC10_YEAST                                                             | 229              | DTHEWAQTL---PE-TNNVFQDAIL-R                          | 250         |      |        |            |
| -----                                                                   |                  |                                                      |             |      |        |            |
| Name 1: MPIP3_HUMAN                                                     |                  |                                                      |             |      |        |            |
| Name 2: MPIP_DROME                                                      |                  |                                                      |             |      |        |            |
| M-phase inducer phosphatase 3 OS=Homo sapiens GN=CDC25C PE=1 SV=2       |                  |                                                      |             |      |        |            |
| M-phase inducer phosphatase OS=Drosophila melanogaster GN=stg PE=1 SV=2 |                  |                                                      |             |      |        |            |
| Needed for following interaction(s):                                    |                  |                                                      |             |      |        |            |
| fly                                                                     | genetic          | RASK_HUMAN                                           | MPIP3_HUMAN | KRAS | CDC25C | RAS1_DROME |
| MPIP_DROME                                                              |                  |                                                      |             |      |        |            |
| Length sequence 1:                                                      | 473              |                                                      |             |      |        |            |
| Length sequence 2:                                                      | 479              |                                                      |             |      |        |            |
| Sequence #1:                                                            | MPIP3_HUMAN      |                                                      |             |      |        |            |
| Sequence #2:                                                            | MPIP_DROME       |                                                      |             |      |        |            |
| Length #1:                                                              | 547              |                                                      |             |      |        |            |
| Length #2:                                                              | 547              |                                                      |             |      |        |            |
| Matrix:                                                                 | BLOSUM62         |                                                      |             |      |        |            |
| Gap open:                                                               | 2.0              |                                                      |             |      |        |            |
| Gap extend:                                                             | 1.0              |                                                      |             |      |        |            |
| Length:                                                                 | 547              |                                                      |             |      |        |            |
| Identity:                                                               | 195/547 (35.65%) |                                                      |             |      |        |            |
| Similarity:                                                             | 266/547 (48.63%) |                                                      |             |      |        |            |
| Gaps:                                                                   | 161/547 (29.43%) |                                                      |             |      |        |            |
| Score:                                                                  | 793.00           |                                                      |             |      |        |            |
| MPIP3_HUMAN                                                             | 1                | MSTELFS-STREEGSS-G--SGPSFRSNQRKMLNLL-LER-DTSF---TV   | 41          |      |        |            |
| MPIP_DROME                                                              | 14               | MDCNI-SNNT-SSSSSINKMSG-S-R-RARRSLELMSMDQEELSFYDDDV   | 58          |      |        |            |
| MPIP3_HUMAN                                                             | 42               | CP-DVPR--TP--VGKFL---GDSA---NL---SIL-S-G--G--TPKR    | 70          |      |        |            |
| MPIP_DROME                                                              | 59               | VPQDQQRASASPELMG-LLSPEG-SPQRFQIVRQPKILPAMGVSSDHTPAR  | 106         |      |        |            |
| MPIP3_HUMAN                                                             | 71               | CLDLSN-LSSGEITATQLTTSADLDETGH--L---DS-SGLQEVHL---A   | 110         |      |        |            |
| MPIP_DROME                                                              | 107              | SFRIFNSLSS---TCS-MESSMD-DE--YMELFEMESQS--QQTALGFPS   | 147         |      |        |            |
| MPIP3_HUMAN                                                             | 111              | GMN---HDQHLMKCSPAQLLCCSTPNGLD-RGHR---KRDAMC5SSANKEN  | 153         |      |        |            |
| MPIP_DROME                                                              | 148              | GLNSLISGQ--IKEQPA---AKSPAGLSMR--RPSVRR---CLSMT--ES   | 185         |      |        |            |
| MPIP3_HUMAN                                                             | 154              | DNGNLVDSEM KYLGSPIITVTPKLDKPNLGEDQAEIISDELMEFSLKDQE  | 203         |      |        |            |
| MPIP_DROME                                                              | 186              | -NTN-----S---TTTPP-PKTP---E-TAR---D--C-F--KRPE       | 209         |      |        |            |
| MPIP3_HUMAN                                                             | 204              | AKVSRSGLYRSPSPENLNRPRLKQVEKFKDN-TIPDKVKKKYFSGQKGL    | 252         |      |        |            |
| MPIP_DROME                                                              | 210              | PPAS-ANC--SP-I-Q-S-KRHRCAAVE--KENCAPAPSPLSQVITSHPPPL | 251         |      |        |            |
| MPIP3_HUMAN                                                             | 253              | RKGLCLKKTVSLCDITITQM--L--EEDSNQGHGIDGFSKVCALPTVSGK   | 298         |      |        |            |
| MPIP_DROME                                                              | 252              | RK--CM----SLNDAEI--MSALARSENREPELIGDFSKAYALPLMGR     | 293         |      |        |            |

|                                                                                                          |                  |                                                     |            |      |      |            |
|----------------------------------------------------------------------------------------------------------|------------------|-----------------------------------------------------|------------|------|------|------------|
| MPIP3_HUMAN                                                                                              | 299              | HQDLKYVNPETVAALLSGKFOGLIEKF--Y-VIDCRYPYEYLGHHIQGAL  | 345        |      |      |            |
| MPIP_DROME                                                                                               | 294              | HRDLKSISETVARLLKGEFS---DKVASRYRIDCRYPYEFEGGHIEGAK   | 340        |      |      |            |
| MPIP3_HUMAN                                                                                              | 346              | NLYSQEELFNFFL--KKPIVPLDQ-----KRIIIVFHCFSSSERGPR     | 386        |      |      |            |
| MPIP_DROME                                                                                               | 341              | NLYTTEQILDEFQVQ--TELQQQNAESGHKRNIIIFHCFSSSERGPK     | 388        |      |      |            |
| MPIP3_HUMAN                                                                                              | 387              | MCRCLR--EEDRSLNQYPALYPPELYILKGGYRDFPE-YMELCEPQSYC   | 433        |      |      |            |
| MPIP_DROME                                                                                               | 389              | MSRFLRNLDRERNTNAYPALHYPEIYLHNGYKEFF-ESHVELCEPHAYR   | 437        |      |      |            |
| MPIP3_HUMAN                                                                                              | 434              | PMHHQD--HKTELLR-CRSQSKVQEGE-----RQL---REQIALL       | 467        |      |      |            |
| MPIP_DROME                                                                                               | 438              | TM--LDPAY-NEAYRHFRAKSKSWNGDLGGATGR-LKKSRSRL-ML      | 479        |      |      |            |
| -----                                                                                                    |                  |                                                     |            |      |      |            |
| Name 1: DYN2_HUMAN                                                                                       |                  |                                                     |            |      |      |            |
| Name 2: DNM1_YEAST                                                                                       |                  |                                                     |            |      |      |            |
| Dynamin-2 OS=Homo sapiens GN=DNM2 PE=1 SV=2                                                              |                  |                                                     |            |      |      |            |
| Dynamin-related protein DNMI OS=Saccharomyces cerevisiae (strain ATCC 204508 / S 288c) GN=DNM1 PE=1 SV=1 |                  |                                                     |            |      |      |            |
| Needed for following interaction(s):                                                                     |                  |                                                     |            |      |      |            |
| yeast                                                                                                    | genetic          | DYN2_HUMAN                                          | RASK_HUMAN | DNM2 | KRAS | DNM1_YEAST |
| IRA2_YEAST                                                                                               |                  |                                                     |            |      |      |            |
| Length sequence 1:                                                                                       | 870              |                                                     |            |      |      |            |
| Length sequence 2:                                                                                       | 757              |                                                     |            |      |      |            |
| Sequence #1:                                                                                             | DYN2_HUMAN       |                                                     |            |      |      |            |
| Sequence #2:                                                                                             | DNM1_YEAST       |                                                     |            |      |      |            |
| Length #1:                                                                                               | 842              |                                                     |            |      |      |            |
| Length #2:                                                                                               | 842              |                                                     |            |      |      |            |
| Matrix:                                                                                                  | BLOSUM62         |                                                     |            |      |      |            |
| Gap open:                                                                                                | 2.0              |                                                     |            |      |      |            |
| Gap extend:                                                                                              | 1.0              |                                                     |            |      |      |            |
| Length:                                                                                                  | 842              |                                                     |            |      |      |            |
| Identity:                                                                                                | 349/842 (41.45%) |                                                     |            |      |      |            |
| Similarity:                                                                                              | 490/842 (58.19%) |                                                     |            |      |      |            |
| Gaps:                                                                                                    | 191/842 (22.68%) |                                                     |            |      |      |            |
| Score:                                                                                                   | 1592.00          |                                                     |            |      |      |            |
| DYN2_HUMAN                                                                                               | 1                | MGNRGMEELIPLVNKLQDA-FSSIG-QSCHLDLPQI-AVVGQSAGKSSV   | 47         |      |      |            |
| DNM1_YEAST                                                                                               | 1                | MAS--LEDLIPTVNKLQDVMYDS-GIDT--LDLP-ILAVVGSQSSGKSSI  | 44         |      |      |            |
| DYN2_HUMAN                                                                                               | 48               | LENFVGRDFLPRGSGIVTRRPLILQL--I-----F-----S-----      | 76         |      |      |            |
| DNM1_YEAST                                                                                               | 45               | LETLVGRDFLPRGTGIVTRRPLVLQNNISPNSPLEEDDNSVNPHEVT     | 94         |      |      |            |
| DYN2_HUMAN                                                                                               | 77               | K-----T-----E--HA---EFLHCKSKKFTDFDEVRQEIEAET        | 105        |      |      |            |
| DNM1_YEAST                                                                                               | 95               | KISGFEAGTKPLEYRGKERNHADEWGEFLHPGKRFYDFDDIKREIENET   | 144        |      |      |            |
| DYN2_HUMAN                                                                                               | 106              | DRVGTGNTKGISPVPIINLRVYSPHVLNLTLDLPGITKVPVGDQPPDIEYQ | 155        |      |      |            |
| DNM1_YEAST                                                                                               | 145              | ARIAGDKDKGISKIPINLKVFSPHVLNLTLDLPGITKVPVIGEQQPDIEKQ | 194        |      |      |            |
| DYN2_HUMAN                                                                                               | 156              | IKDMILQFISRESSLILAVTPANMDLANS DALKLAKEVDPQGLRTIGVIT | 205        |      |      |            |
| DNM1_YEAST                                                                                               | 195              | IKNLILDYIATPNCLILAVSPANVDLVNSES LKLAKEVDPQGRRTIGVIT | 244        |      |      |            |
| DYN2_HUMAN                                                                                               | 206              | KLDLMDEGTDARDVLENKLLPLRRYIGVVNRSQDKDIEGKDIRAALAAE   | 255        |      |      |            |
| DNM1_YEAST                                                                                               | 245              | KLDLMDSGTNA LDILSGKMYPLKLGFGVVNRSQDQIQLNKTVEESLDKE  | 294        |      |      |            |
| DYN2_HUMAN                                                                                               | 256              | RKFFLSHPAYRHMADRMGTPHLQKTLNQQLTNHIRESLPALRSKLQSQLL  | 305        |      |      |            |
| DNM1_YEAST                                                                                               | 295              | EDYFRKHPVYRTISTKCGTRYLAKLNLQTLTSHIRDKLPDIKTLNT-LI   | 343        |      |      |            |
| DYN2_HUMAN                                                                                               | 306              | S-LEKEVEEYKNFRPDDPTRKTKA-L-LQMVQQFGVDFEKRIEG-SGDQV  | 351        |      |      |            |

|            |     |                                                      |     |
|------------|-----|------------------------------------------------------|-----|
| DNM1_YEAST | 344 | SQTEQELARYGGV--GATTNESRASLVQLMKNKSTNFISSIDGTSSD-I    | 390 |
| DYN2_HUMAN | 352 | DTLELSSGGARI----NRIF-HE-R-F-P-FEL-VKMEFDEKDLRREISYA  | 391 |
| DNM1_YEAST | 391 | NTKELCGGARIYYIYNNVFGNSLSKSIDPSTNSLSV-L-----DVR---T-A | 430 |
| DYN2_HUMAN | 392 | IKNIHGVR-TGLFTPDLEFAEIVKKQVVK-LKEPCLKCVLDVIEQLINTV   | 439 |
| DNM1_YEAST | 431 | IRNSTGPRPT-LFVPELAFDLDLVKQ--IKLLLEPSQRCVELVYELMK-I   | 477 |
| DYN2_HUMAN | 440 | -RQC-TSKLSSYPRLREE-TERIVTTYRER-EGRTKDIQLLLIDIEQSY    | 485 |
| DNM1_YEAST | 478 | CHKCGSAELARYPKLKSMLIE-VISELLRERLQ-PTRSYVESLIDIHFRAY  | 525 |
| DYN2_HUMAN | 486 | INTNHDFIGFA-NAQQ--RSTQLNKKRAIPNOGEIL---VIRR--GWLT    | 527 |
| DNM1_YEAST | 526 | INTNHPNFLS-ATEAMDDIMKTR--RKR---NQ-ELLKSKLSQEQENG-QT  | 567 |
| DYN2_HUMAN | 528 | INNISLMKGGSKKEYWFLTAESLSWYK-DEEE-KEKYYMLPLDNLKIRDV   | 575 |
| DNM1_YEAST | 568 | -NGIN-----G-----TS-SIS-SNIDQDSAKNSDY--D-DD-GI-DA     | 597 |
| DYN2_HUMAN | 576 | E---KG-FMSNKHVFAIFNTEQRN--VY--KD-LRQIELACDSQ-EDVD    | 614 |
| DNM1_YEAST | 598 | ESKQTKGKFL-N-Y-F--FGKDKKQPVFDASDKKRSI--AGDGNIEDFR    | 640 |
| DYN2_HUMAN | 615 | SWKAS-F-LRAG-VYPEKDAQENEDGAQENTFSMDPQL-ER-QV--ETIR   | 657 |
| DNM1_YEAST | 641 | NLQISDFSL--GDI----DDLEN--A-E-----PPLTEREELECELIK     | 674 |
| DYN2_HUMAN | 658 | NLVDSYVAIINKSIRDLMPKTIMHLMINNTK-AFIHHELLAYLYSSADQS   | 706 |
| DNM1_YEAST | 675 | RLIVSYFDIIREMIEDQVPKAVMCLLVNYCKDS-VQNRLVTKLY---KE    | 719 |
| DYN2_HUMAN | 707 | SLMEE--SADQ--AQRDDM---LRMYHALKEA--L--NII             | 736 |
| DNM1_YEAST | 720 | TLFEELLVEDQTLAQDR-ELCVKSLGVY---KKAATLISNIL           | 757 |

Name 1: TTC31\_HUMAN  
Name 2: STI1\_YEAST

Tetratricopeptide repeat protein 31 OS=Homo sapiens GN=TTC31 PE=2 SV=3  
Heat shock protein STI1 OS=Saccharomyces cerevisiae (strain ATCC 204508 / S288c)  
GN=STI1 PE=1 SV=1

Needed for following interaction(s):

| yeast      | genetic | PTTG1_HUMAN | TTC31_HUMAN | PTTG1 | TTC31 | SECU_YEAST |
|------------|---------|-------------|-------------|-------|-------|------------|
| STI1_YEAST |         |             |             |       |       |            |

Length sequence 1: 519  
Length sequence 2: 589  
Sequence #1: TTC31\_HUMAN  
Sequence #2: STI1\_YEAST  
Length #1: 665  
Length #2: 665  
Matrix: BLOSUM62  
Gap open: 2.0  
Gap extend: 1.0  
Length: 665  
Identity: 168/665 (25.26%)  
Similarity: 267/665 (40.15%)  
Gaps: 253/665 (38.05%)  
Score: 513.00

|             |    |                                                    |     |
|-------------|----|----------------------------------------------------|-----|
| TTC31_HUMAN | 2  | A-PIPKTVGRIKLDCSLRPSK--PL-EVA-A---APKLC-KEFGP---ED | 39  |
| STI1_YEAST  | 31 | AIEVSETPNHV-L-YSNRSACTYSLKKFSDALNDANE-CVK-INPSWSKG | 76  |
| TTC31_HUMAN | 40 | Y---G-EE---DIVD-----FLRR-L-VE-SD---PQGLHRIH-VDGSS  | 69  |
| STI1_YEAST  | 77 | YNRLGAHGLGLDL-DEAESNY-KKALELDASNKAAKEGLDQVHRT--QQ  | 122 |
| TTC31_HUMAN | 70 | GRLQLWHHDYLLG--HL--D-D--EG--KS--TGQ--SD-----R--G-K | 98  |

|             |     |                                                     |     |
|-------------|-----|-----------------------------------------------------|-----|
| STI1_YEAST  | 123 | AR-QA-QPD--LGLTQLFADPNLIENLKNPKTSEMMDPQLVAKLIGYK    | 168 |
| TTC31_HUMAN | 99  | -G--AEG-----L---GTYCG--L-----RKS-FLYP--PQ--ES-      | 120 |
| STI1_YEAST  | 169 | QNPQAIGQDLFTDPRLMTIMATLMGVLDLNMDDINQSNM-PKEPETSKST  | 217 |
| TTC31_HUMAN | 121 | E---PC-POSPSASATFSPVSDSLLQVAMPQKLLVTEEEANRLAE--ELV  | 164 |
| STI1_YEAST  | 218 | EQKKADEPQS-D-STT--SKENS--SKA-PQK-----EESKE-SEPME-V  | 253 |
| TTC31_HUMAN | 165 | AEEE-RM---KQKAE-KKRLKKRQ--K--E--RKRQERLEQ--YCGEP    | 200 |
| STI1_YEAST  | 254 | DEDDSKIADKEKAEENK-FYKARQFDEAIEHYNKAW-E-LHKDITYLNN-  | 300 |
| TTC31_HUMAN | 201 | KASTTSD-GD-ESPPSSPGN-PVQGCQGE--ED-SLDLSSSTFVSL--AL  | 242 |
| STI1_YEAST  | 301 | RAAAEYKGEYETAISTL-NDAVE-Q-GREMRADYKV-ISKSFARIGNAY   | 346 |
| TTC31_HUMAN | 243 | RKVGDWPLSARR--E---KGLNQEPQGRGLA--LQKMGQEEESPPE-ER   | 284 |
| STI1_YEAST  | 347 | HKLGD--L--KKTIEYYQKSLT-E-H-R-TADILTCL-RNAE---KELKK  | 384 |
| TTC31_HUMAN | 285 | PQ-QSPKVOASPGLLAAALQOSQELAKL-GTS-FAQNGFYHEAVVLFQQA  | 331 |
| STI1_YEAST  | 385 | AEAEA-YV--NP-----EKAEE-ARLEGKEYFTKSD-WPNAVKAYTEM    | 422 |
| TTC31_HUMAN | 332 | LKLNPDHRLFG--NRSFCHERL-GQPAAWALADAQVALTLR-PGWPRGLF  | 377 |
| STI1_YEAST  | 423 | IKRAPEDAR--GYSNRAAALAKLMSFPE-AIADCNKAIE-KDPNFVFRAYI | 468 |
| TTC31_HUMAN | 378 | RLGKALMGLQ-RFRE-AAAVFQETL---R-----GGSQPDAARELRSC    | 415 |
| STI1_YEAST  | 469 | R--KAT--AQIAVKEYASAL--ETLDAARTKDAEVNNGS---SAREIDQ-  | 508 |
| TTC31_HUMAN | 416 | LLHLTLQQRGGICAPPLSPGALQPLPHAEALAPSLRCPSTALRSP       | 465 |
| STI1_YEAST  | 509 | LYYKASQ-QR-----FQPGT---SN-E-TPE--ETYQ--R--AMKDP     | 538 |
| TTC31_HUMAN | 466 | GLSPLLHYP---S-CHRSHPNQP--LSQTQSRPHPLKPKQDPS--KGWDI  | 507 |
| STI1_YEAST  | 539 | EVAAIMQDPVMQSIQQAAQN-PAAL-Q-E---H-MK--NPEVFK--KI    | 576 |
| TTC31_HUMAN | 508 | --L-GLGLQHLSQLAR                                    | 519 |
| STI1_YEAST  | 577 | QTLIAAGI--IRTGR                                     | 589 |

Name 1: TFDP1\_HUMAN  
Name 2: TFDP\_DROME

Transcription factor Dp-1 OS=Homo sapiens GN=TFDP1 PE=1 SV=1  
Transcription factor Dp OS=Drosophila melanogaster GN=Dp PE=1 SV=2

Needed for following interaction(s):

| fly        | genetic | RASK_HUMAN | TFDP1_HUMAN | KRAS | TFDP1 | RAS1_DROME |
|------------|---------|------------|-------------|------|-------|------------|
| TFDP_DROME |         |            |             |      |       |            |

Length sequence 1: 410  
Length sequence 2: 445  
Sequence #1: TFDP1\_HUMAN  
Sequence #2: TFDP\_DROME  
Length #1: 489  
Length #2: 489  
Matrix: BLOSUM62  
Gap open: 2.0  
Gap extend: 1.0  
Length: 489  
Identity: 216/489 (44.17%)  
Similarity: 273/489 (55.83%)  
Gaps: 123/489 (25.15%)  
Score: 946.00

|             |   |                                                  |    |
|-------------|---|--------------------------------------------------|----|
| TFDP1_HUMAN | 1 | MA-KDAGLI---EAN-----GEL-KVFID--QNLSP---GKGVVSLV- | 32 |
|-------------|---|--------------------------------------------------|----|



|             |     |                                                      |     |
|-------------|-----|------------------------------------------------------|-----|
| TFDP_DROME  | 1   | MAHSTGGTVKTKDEVNFFFRNEHQISKM-LKPAQNKSEMEGGK-PVAVVY   | 48  |
| TFDP1_HUMAN | 33  | AV-----HP-S-T-V-NPLGKQLLPKTFGQSNVNIAQ-QVV-I---G-T-   | 66  |
| TFDP_DROME  | 49  | ATGSSARNSSGSASGIGN-VGR--M-GAFSQ--MG-SQGQFIRLQDNGLSI  | 91  |
| TFDP1_HUMAN | 67  | PQRPAASN-TLV-----VGS-----P-----H---TP-----S-THF      | 88  |
| TFDP_DROME  | 92  | PKTEAGTYYTTVSAQKTSAGSGHYDLPKGDYRVKFTPNPIKMKSKLH-     | 140 |
| TFDP1_HUMAN | 89  | ASQ-N---QPSDSSPWSAGKRNKGEKNGKGLRHFHSMKVCEKVQRKG-TT   | 133 |
| TFDP_DROME  | 141 | AIQNSNLHMSMSASS--SSVQRKRKPKDAGKGLRHFHSMKVCEKVEEKGKTT | 188 |
| TFDP1_HUMAN | 134 | SYNEVADELVA-EF--SAADNHILPNESAYDQKNIRRRVYDALNVLMAMN   | 180 |
| TFDP_DROME  | 189 | -YNEVADDLVSEEMKNAYDN---N--C-DQKNIRRRVYDALNVLMAMN     | 230 |
| TFDP1_HUMAN | 181 | IISKEKKEIKWIGLPTNSAQEC-QNLEVER-QRRLERIKQKQSQLQELIL   | 228 |
| TFDP_DROME  | 231 | VISKDKKEIRWIGLPANST-ETFLALEEENCQRR-ERIKQKNEMLREMIM   | 278 |
| TFDP1_HUMAN | 229 | QQIAFKNLVQRN-RHAEQQASRPPPPN-SVIHLPFIIIVNTSKKTVIDCSI  | 276 |
| TFDP_DROME  | 279 | QHVAFKGLVERNKRN-ESQGV-VSPNAS-IQLPFIIVNTHKSTKINCSV    | 325 |
| TFDP1_HUMAN | 277 | SNDKFEYLFNFDNTFEIHDDIEVLKRMGMACGLESGSCSAEDLKMARSLV   | 326 |
| TFDP_DROME  | 326 | TNDKSEYIFKFDKTFEMHDDIEVLKRMGFLGLDKGECTPENIERVKSUV    | 375 |
| TFDP1_HUMAN | 327 | PKALEPYVTEMAQGTGGVFFITTAGSTSNTRFSASDLTNGADGML--AT    | 374 |
| TFDP_DROME  | 376 | PPNLAKYV-E-AYGT--G---KT-G--EN--MYESDDEDNEFNGLYLSAN   | 413 |
| TFDP1_HUMAN | 375 | SSNG-SQYSGSRVETPVSYVGEDD-EEDDDFNENDEDED-D            | 410 |
| TFDP_DROME  | 414 | ESQGFAQHS-AQ-HT-TD--GEFKLEMDDD--ELDDDDID             | 445 |

-----  
Name 1: SURF4\_HUMAN  
Name 2: ERV29\_YEAST

Surfeit locus protein 4 OS=Homo sapiens GN=SURF4 PE=1 SV=3  
ER-derived vesicles protein ERV29 OS=Saccharomyces cerevisiae (strain ATCC 20450  
8 / S288c) GN=ERV29 PE=1 SV=1

Needed for following interaction(s):  
yeast genetic RASK\_HUMAN SURF4\_HUMAN KRAS SURF4 IRA2\_YEAST  
ERV29\_YEAST

Length sequence 1: 269  
Length sequence 2: 310  
Sequence #1: SURF4\_HUMAN  
Sequence #2: ERV29\_YEAST  
Length #1: 307  
Length #2: 307  
Matrix: BLOSUM62  
Gap open: 2.0  
Gap extend: 1.0  
Length: 307  
Identity: 113/307 (36.81%)  
Similarity: 167/307 (54.40%)  
Gaps: 72/307 (23.45%)  
Score: 520.00

|             |    |                                                    |     |
|-------------|----|----------------------------------------------------|-----|
| SURF4_HUMAN | 3  | QN-DLMG-TAE---DFADQFL-RV---T-----KQYLPHVARLCLIS    | 35  |
| ERV29_YEAST | 32 | QNQSTSGILKQWKHSF-EKFASRIEGLTDNAVYKLPYIPSLSRFFIVA   | 80  |
| SURF4_HUMAN | 36 | TFLEDGIRMWFQWSEQRDYIDTTW-NCGYLLASSF--VFLNL--LGQLTG | 80  |
| ERV29_YEAST | 81 | TFYEDSFRILSQWSDQIFYLN-KWKHYYPF---FVVVFLVVVTVSMILG  | 125 |

|             |     |                                                      |     |
|-------------|-----|------------------------------------------------------|-----|
| SURF4_HUMAN | 81  | C-VLVLSRNFVQ--YACFG-LFG-IIALQTIAYSILW-DLKFLMRNLA-L   | 123 |
| ERV29_YEAST | 126 | ASLLVL-RK--QTNVAT-GVLCACVIS-QALVYG-LFTGSSFVLRNFSVI   | 169 |
| SURF4_HUMAN | 124 | GGLLLLLLAESRS--EGKSMFAG-VPTMRESSPK-Q-YMQL-GGRVLLVL   | 167 |
| ERV29_YEAST | 170 | GG---LLIAFSDSIVQNKITTF-GMLPELNSKNDKAKGYL-LFAGRILIVL  | 214 |
| SURF4_HUMAN | 168 | MFM--TLLHFDASFFSIVQNIIVGTALMLILVAIGFKTKLAALTL-VVWL-F | 213 |
| ERV29_YEAST | 215 | MFAIAFT---FSKSWFTVVLTIIGT---ICFAIGYKTKFASIMGLLI-LTF  | 257 |
| SURF4_HUMAN | 214 | AINVYFNAFWTIPVY--KPMHDFLKYDFQTMSSVIGLLLLVVALGPGGV    | 260 |
| ERV29_YEAST | 258 | -YINITLNNYW---FYNTNK--RDFLKYEFYQNLSTIGLLLLVNTGAGEL   | 301 |
| SURF4_HUMAN | 261 | SMDEKKK                                              | 267 |
| ERV29_YEAST | 302 | SVDEKKK                                              | 308 |

-----  
Name 1: YME1L\_HUMAN  
Name 2: YME1\_YEAST

ATP-dependent zinc metalloprotease YME1L OS=Homo sapiens GN=YME1L PE=1 SV=2  
Mitochondrial inner membrane i-AAA protease supercomplex subunit YME1 OS=Sacchar  
omyces cerevisiae (strain ATCC 204508 / S288c) GN=YME1 PE=1 SV=1

Needed for following interaction(s):  
yeast genetic BLM\_HUMAN YME1L\_HUMAN BLM YME1L SGS1\_YEAST  
YME1\_YEAST

Length sequence 1: 773  
Length sequence 2: 747  
Sequence #1: YME1L\_HUMAN  
Sequence #2: YME1\_YEAST  
Length #1: 853  
Length #2: 853  
Matrix: BLOSUM62  
Gap open: 2.0  
Gap extend: 1.0  
Length: 853  
Identity: 351/853 (41.15%)  
Similarity: 486/853 (56.98%)  
Gaps: 217/853 (25.44%)  
Score: 1544.00

|             |     |                                                      |     |
|-------------|-----|------------------------------------------------------|-----|
| YME1L_HUMAN | 1   | MFSLSS-TVQPQVTVPLSHLINAFHTPKNTSV-SLSGVSVSQNQHRDVPV   | 48  |
| YME1_YEAST  | 1   | M-NVSKILVSPVT---TNVLRIF-APR---LPQI-GASL-----LV-      | 33  |
| YME1L_HUMAN | 49  | EHE-APSSCEMFSDFLT-KLNIVSIG---KGKIFEGYRSMFMEPAKRMK    | 92  |
| YME1_YEAST  | 34  | QKKWALRSK-KFYRFYSEK-N--S-GEMPPK-K--EA-DS---SGKASN    | 70  |
| YME1L_HUMAN | 93  | KS-LDTTNDNWHIRPEPFLSIPPSLNLRLDLGLSELKIGQIDQVENLLPG   | 141 |
| YME1_YEAST  | 71  | KSTISSIDN--SQP-P-----PPS-NTND---KTK-----Q--ANV---    | 97  |
| YME1L_HUMAN | 142 | FCCKGNISSHWHTSHVSA--QSFFE-NKYGNLDFSTLRS---SCLYRH     | 184 |
| YME1_YEAST  | 98  | ---A--VS---H-AMLATREQ---EANK---DL--T--SPDAQAAFYK-    | 126 |
| YME1L_HUMAN | 185 | HSRALQSICSDLYWPFVFIQSRGFKTLKSRTRRLQSTSERLAETQNIAPS   | 234 |
| YME1_YEAST  | 127 | --LLLQS-----NY-PQYVVS-R-FET-PG-----IASSPECM-E---L--- | 155 |
| YME1L_HUMAN | 235 | FVKGFLLRDR-G--S--D-V-ESLDKLMKTK---NIPE-AHQDAFKTGF    | 272 |
| YME1_YEAST  | 156 | YMEA--LQ-RIGRHSEADAVRQNL--LTASSAGAVN-PSLASSSSNQSGY   | 199 |
| YME1L_HUMAN | 273 | AEG-F--LKAQAL--TQK-----TNDSLRRT-RLI-LFV--LLLFGI--    | 305 |
| YME1_YEAST  | 200 | -HGNFPMSYS-PLYGSRKEPLHVVSSES---TFTVVSRRVWKLLVFGILT   | 244 |

|                                                                                                   |         |                                                     |            |      |       |            |             |
|---------------------------------------------------------------------------------------------------|---------|-----------------------------------------------------|------------|------|-------|------------|-------------|
| YME1_HUMAN                                                                                        | 306     | YGLLKNPFLSVRFR--T--TTGL-----DSAVDPVQMK-NVTFEHSVKG   | 343        |      |       |            |             |
| YME1_YEAST                                                                                        | 245     | Y----S-F-SEGFKYITENTT-LLKSSEVADKSVD-V-AKTNVKFDDVCG  | 285        |      |       |            |             |
| YME1_HUMAN                                                                                        | 344     | VEEAKQELQEVVEFLKNPKQFTILGGKLPKGIILVGPPTGKTLARAVA    | 393        |      |       |            |             |
| YME1_YEAST                                                                                        | 286     | CDEARAELEEIVDFLKDPTKYESLGGKLPKGVLLTGPPPTGKTLARATA   | 335        |      |       |            |             |
| YME1_HUMAN                                                                                        | 394     | GEADVPPFYASGSEFDEMFGVGSASRIRNLFREAKANAPCVIFIDELDSV  | 443        |      |       |            |             |
| YME1_YEAST                                                                                        | 336     | GEAGVDFFFMSGSEFDEVYVGVGAKRIRDLFAQARSRAPIIFIDELDAI   | 385        |      |       |            |             |
| YME1_HUMAN                                                                                        | 444     | GGKRIESPM-HPYSRQTINQLLAEMDGFKNPNEGVIIGATNFPEALDNAL  | 492        |      |       |            |             |
| YME1_YEAST                                                                                        | 386     | GGKR--NPKDQAYAKQTLNQLLVELDGFSGTSGIIIGATNFPEALDKAL   | 433        |      |       |            |             |
| YME1_HUMAN                                                                                        | 493     | IRPGRFDMQVTVPRPDVKGRTEILKWLKIKF-DQSVDEPIIARGTVGF    | 541        |      |       |            |             |
| YME1_YEAST                                                                                        | 434     | TRPGRFDKVVNVDLPDVRGRADILKHHMKITLAD-NVDPPIIARGTPGL   | 482        |      |       |            |             |
| YME1_HUMAN                                                                                        | 542     | SGAELENLVNQAL---KAAVDGKEMVTMKELEFSKDKILMGPFERS-V    | 586        |      |       |            |             |
| YME1_YEAST                                                                                        | 483     | SGAELANLVNQAAVYACQKNAVS---VDMSHFEWAKDKILMGAERKTMV   | 528        |      |       |            |             |
| YME1_HUMAN                                                                                        | 587     | EI-DNKNTITAYHESGHAIAYYTKDAMPINKATIMPRGPTLGHVSL-L    | 634        |      |       |            |             |
| YME1_YEAST                                                                                        | 529     | -LTDAARKA-TAFHEAGHAIMAKYTNGATLFLYKATILPRGRALG-ITFQL | 575        |      |       |            |             |
| YME1_HUMAN                                                                                        | 635     | PENDRWNET-R-AQLLAQMDVSMGGRVAEELIFGTDHITT-GASSDFDNA  | 681        |      |       |            |             |
| YME1_YEAST                                                                                        | 576     | PEMDKVDITKRECQ--ARLDVCMGGKIAEELIYGKDN-TTSGCGSDIQLSA | 622        |      |       |            |             |
| YME1_HUMAN                                                                                        | 682     | TKIAKRMVTKFGMSEKLG-V-MT--Y-SDTGKLSPETQSAIEQEIRI-LL  | 725        |      |       |            |             |
| YME1_YEAST                                                                                        | 623     | TGTARAMVTQYGMSSDDVGPVNLSENWESWSNKIR-DI--A-DNEV-IELL | 667        |      |       |            |             |
| YME1_HUMAN                                                                                        | 726     | RDSYERAKHILKTHAK--E-HKNLAEALLTYETLDAKEI-QIVLEGKLE   | 771        |      |       |            |             |
| YME1_YEAST                                                                                        | 668     | KDSEERARRLL-T-KKNVELHR-LAQGLIEYETLDAHEIEQ-VCKGEKLD  | 713        |      |       |            |             |
| YME1_HUMAN                                                                                        | 772     | -VR 773                                             |            |      |       |            |             |
| YME1_YEAST                                                                                        | 714     | KLK 716                                             |            |      |       |            |             |
| -----                                                                                             |         |                                                     |            |      |       |            |             |
| Name 1: BR44_HUMAN                                                                                |         |                                                     |            |      |       |            |             |
| Name 2: FMP43_YEAST                                                                               |         |                                                     |            |      |       |            |             |
| Brain protein 44 OS=Homo sapiens GN=BRP44 PE=1 SV=1                                               |         |                                                     |            |      |       |            |             |
| UPF0041 protein FMP43 OS=Saccharomyces cerevisiae (strain ATCC 204508 / S288c) GN=FMP43 PE=1 SV=1 |         |                                                     |            |      |       |            |             |
| Needed for following interaction(s):                                                              |         |                                                     |            |      |       |            |             |
| yeast                                                                                             | genetic | RASK_HUMAN                                          | BR44_HUMAN | KRAS | BRP44 | IRA2_YEAST | FMP43_YEAST |
| Length sequence 1: 127                                                                            |         |                                                     |            |      |       |            |             |
| Length sequence 2: 146                                                                            |         |                                                     |            |      |       |            |             |
| Sequence #1: BR44_HUMAN                                                                           |         |                                                     |            |      |       |            |             |
| Sequence #2: FMP43_YEAST                                                                          |         |                                                     |            |      |       |            |             |
| Length #1: 138                                                                                    |         |                                                     |            |      |       |            |             |
| Length #2: 138                                                                                    |         |                                                     |            |      |       |            |             |
| Matrix: BLOSUM62                                                                                  |         |                                                     |            |      |       |            |             |
| Gap open: 2.0                                                                                     |         |                                                     |            |      |       |            |             |
| Gap extend: 1.0                                                                                   |         |                                                     |            |      |       |            |             |
| Length: 138                                                                                       |         |                                                     |            |      |       |            |             |
| Identity: 61/138 (44.20%)                                                                         |         |                                                     |            |      |       |            |             |
| Similarity: 78/138 (56.52%)                                                                       |         |                                                     |            |      |       |            |             |
| Gaps: 33/138 (23.91%)                                                                             |         |                                                     |            |      |       |            |             |
| Score: 280.00                                                                                     |         |                                                     |            |      |       |            |             |
| BR44_HUMAN                                                                                        | 1       | MSAAGARGLRATYHRLLDKVELMLPEKLRPLYNHPAGPRTVFFWAPIMKW  | 50         |      |       |            |             |
|                                                                                                   |         | : ... :                                             | : ... :    |      |       |            |             |

|                                                                                                                            |         |                                                     |           |       |     |            |            |
|----------------------------------------------------------------------------------------------------------------------------|---------|-----------------------------------------------------|-----------|-------|-----|------------|------------|
| FMP43_YEAST                                                                                                                | 1       | MSAS-AFNF-A-F-R-----R-FWNSETGPKTVHFWAPTLKW          | 32        |       |     |            |            |
| BR44_HUMAN                                                                                                                 | 51      | GLVCAGLADMARPAEKLSTAQSAVLMATGFIWSRYSLVIIPKNWSLFA-V  | 99        |       |     |            |            |
| FMP43_YEAST                                                                                                                | 33      | GLVFAGLNDIKRPVEKVSQAQNLSSLATALIWRWSFVIKPKNY-LLASV   | 81        |       |     |            |            |
| BR44_HUMAN                                                                                                                 | 100     | NFFVG-AAG--ASQL--FRIWRYN-QELKAKA-H---K 127          |           |       |     |            |            |
| FMP43_YEAST                                                                                                                | 82      | NFFLGCTAGYHLTRIANFRI-R-NGDSFK-QVIHYIIK 116          |           |       |     |            |            |
| -----                                                                                                                      |         |                                                     |           |       |     |            |            |
| Name 1: BICD2_HUMAN                                                                                                        |         |                                                     |           |       |     |            |            |
| Name 2: SMC3_YEAST                                                                                                         |         |                                                     |           |       |     |            |            |
| Protein bicaudal D homolog 2 OS=Homo sapiens GN=BICD2 PE=1 SV=1                                                            |         |                                                     |           |       |     |            |            |
| Structural maintenance of chromosomes protein 3 OS=Saccharomyces cerevisiae (strain ATCC 204508 / S288c) GN=SMC3 PE=1 SV=1 |         |                                                     |           |       |     |            |            |
| Needed for following interaction(s):                                                                                       |         |                                                     |           |       |     |            |            |
| yeast                                                                                                                      | genetic | BICD2_HUMAN                                         | BLM_HUMAN | BICD2 | BLM | SMC3_YEAST | SGS1_YEAST |
| Length sequence 1: 824                                                                                                     |         |                                                     |           |       |     |            |            |
| Length sequence 2: 1230                                                                                                    |         |                                                     |           |       |     |            |            |
| Sequence #1: BICD2_HUMAN                                                                                                   |         |                                                     |           |       |     |            |            |
| Sequence #2: SMC3_YEAST                                                                                                    |         |                                                     |           |       |     |            |            |
| Length #1: 1187                                                                                                            |         |                                                     |           |       |     |            |            |
| Length #2: 1187                                                                                                            |         |                                                     |           |       |     |            |            |
| Matrix: BLOSUM62                                                                                                           |         |                                                     |           |       |     |            |            |
| Gap open: 2.0                                                                                                              |         |                                                     |           |       |     |            |            |
| Gap extend: 1.0                                                                                                            |         |                                                     |           |       |     |            |            |
| Length: 1187                                                                                                               |         |                                                     |           |       |     |            |            |
| Identity: 333/1187 (28.05%)                                                                                                |         |                                                     |           |       |     |            |            |
| Similarity: 508/1187 (42.80%)                                                                                              |         |                                                     |           |       |     |            |            |
| Gaps: 489/1187 (41.20%)                                                                                                    |         |                                                     |           |       |     |            |            |
| Score: 995.00                                                                                                              |         |                                                     |           |       |     |            |            |
| BICD2_HUMAN                                                                                                                | 2       | SAPSEEEYARL-VME---AQP-E-WLRAEVKRLSHELAEETREKIQA-    | 43        |       |     |            |            |
| SMC3_YEAST                                                                                                                 | 156     | NA--KDKR--RLQLLEDVVGAKSFEVKLKASLKKM--E--ETEQQKIQIN  | 197       |       |     |            |            |
| BICD2_HUMAN                                                                                                                | 44      | AEYG-L-AVL-E-EKHQLK-LQ-FEELE---VDYE-AI--RSEM-E---   | 76        |       |     |            |            |
| SMC3_YEAST                                                                                                                 | 198     | KEMGELNSKLEMEQER-KELEKYNELEERNKI-YQFTLYDR-ELNEVIN   | 244       |       |     |            |            |
| BICD2_HUMAN                                                                                                                | 77      | QLKEAF-GQAHTNHKKVAADGESREESLIQESASK-E---QYVV-RKV-   | 118       |       |     |            |            |
| SMC3_YEAST                                                                                                                 | 245     | QM-ERLDGD-Y-NN-TVYS---S-EQ-YIQE-LDKREDMIDQ--VSKKLS  | 282       |       |     |            |            |
| BICD2_HUMAN                                                                                                                | 119     | -LE--LQ---TELKQ--LR--NV---LTNT-----QS-E-NE--R-      | 141       |       |     |            |            |
| SMC3_YEAST                                                                                                                 | 283     | SIEASLKIKNATDLQAKLRESEISQKLTNNVVKIKDVQQIESNEEQRN    | 332       |       |     |            |            |
| BICD2_HUMAN                                                                                                                | 142     | LASVAQELKEINQN-VEIQR---GR-L-R-DDI-KE---YKFREA----   | 175       |       |     |            |            |
| SMC3_YEAST                                                                                                                 | 333     | LDS-A-TLKEI-KSII-E-QRKQKLSKILPRYQELTKEEAMYKIQLASLQQ | 378       |       |     |            |            |
| BICD2_HUMAN                                                                                                                | 176     | --R-L-LQ--DY---SELEE-EN-I-S-LQ--KQVSVLQRNQV-EFEG-   | 207       |       |     |            |            |
| SMC3_YEAST                                                                                                                 | 379     | KQRDLILKKGEYARFKSK-DERDTWIHSEIEELKS-SI--QN-LNELESQ  | 423       |       |     |            |            |
| BICD2_HUMAN                                                                                                                | 208     | LKHE---I-KR---LEEETEYL---N-----SOLE--DA---IRLKE-IS  | 236       |       |     |            |            |
| SMC3_YEAST                                                                                                                 | 424     | LQMDRTSLRKQYSAIDEEIEELIDSINGPDTKGQLEDPDFSELHLKQKLS  | 473       |       |     |            |            |
| BICD2_HUMAN                                                                                                                | 237     | E---R-QL---EEALET-LKT---E-REQN-----SL-----R-K       | 259       |       |     |            |            |
| SMC3_YEAST                                                                                                                 | 474     | ESLDTRKELWRKEQLQTVLETLLSDVQNQRNVNMTSRNSLANGIINVK    | 523       |       |     |            |            |
| BICD2_HUMAN                                                                                                                | 260     | ELSHYMSIN-DS-FYT-SHL-HVSLDGLKFSDDAAE---PNN-----DA   | 296       |       |     |            |            |
| SMC3_YEAST                                                                                                                 | 524     | EITEKLIKISPEVFGTLGELIKVN-D--KYK-TCAEVIIGNSLFHIVVDT  | 569       |       |     |            |            |
| BICD2_HUMAN                                                                                                                | 297     | E--A-LV-NGFE-H---GG-----LAKLPLD-----NKTS----TP-     | 320       |       |     |            |            |

|             |      |                                                     |      |
|-------------|------|-----------------------------------------------------|------|
| SMC3_YEAST  | 570  | EETATLIMN--ELYRMKGGRVTFIPLNRLSLSDVKFSPNSNTTQIQFTPL  | 617  |
| BICD2_HUMAN | 321  | --KK---EGLAPPSPSLVSDLLSE-LNISEI--KQKQQLMQMEREKAGLLA | 364  |
| SMC3_YEAST  | 618  | IKKIKYE---PRFEKAVKHVFGKTIIVVKDLGQGLK--L--AKKHK--LNA | 658  |
| BICD2_HUMAN | 365  | -TLQ-D-TQKQ--LEHTRGSLSEQQEKVTRLTENLSALR--RLQASK--E  | 405  |
| SMC3_YEAST  | 659  | ITLDGDRADKRGVL--TGGYL-DQHKR--TRL--ESLKNLNSRSQHKKILE | 703  |
| BICD2_HUMAN | 406  | RQTALD--NE-KDRDSHE-D---GDYYEVDINGPE-ILA-CK-YHVAV-   | 443  |
| SMC3_YEAST  | 704  | -E--LDFVRNELNDIDT-KIDQVNGNIRKVS--NDRESVLTNIEVYRTSLN | 748  |
| BICD2_HUMAN | 444  | AEAGE---LREQLKA--LR---STHEARE-AQHAEEK--GRYE----AE-  | 477  |
| SMC3_YEAST  | 749  | TKKNEKLILLESNAIILKLEKLNNTN--RTFAQ--EKLNTFENDLLQEF   | 793  |
| BICD2_HUMAN | 478  | -GQALT--EK--V-SLL-E-KA--SR---QDR-E-----L--L-ARLE-   | 503  |
| SMC3_YEAST  | 794  | DSE--LSKEEKERLESSTKEISAHNKLNITSDALEGITTTIDSLNAELES  | 842  |
| BICD2_HUMAN | 504  | K---E--LK-KVSDV--A--G-----ETQGSL--SV-AQ-D-----E     | 526  |
| SMC3_YEAST  | 843  | KLIPQENDLESKMSVGDFAIFGLQDELKELQ--LEKESVEKQHENAVLE   | 890  |
| BICD2_HUMAN | 527  | LVTFS-E-E-L-A---N--LYHHVCMNNETPNRVM---LDYYREGQGG    | 563  |
| SMC3_YEAST  | 891  | LGTVQREIESLIAEETNNKLLLE---KANNQ--QRLLKLLDNF---QKS   | 932  |
| BICD2_HUMAN | 564  | AGRTS-PGGRTS-----PEARGR-RSPILLPKGLLAPEAGRADGGTGD-S  | 605  |
| SMC3_YEAST  | 933  | VEKTMIK--KTTLVTRREELQQRIRE-I---GLL-PE----DALVNDFS   | 970  |
| BICD2_HUMAN | 606  | S-PSPGSSLPSPLSDPRE--PM-NIYNLIAIIRDQIKHLQAADVDRTEL   | 651  |
| SMC3_YEAST  | 971  | DITS--DQLLQRLNDMNTAISGLKNV--NKRAF--ENFKKFN---ERRKDL | 1012 |
| BICD2_HUMAN | 652  | SRQRIASQELGPAVDKDKKEALMEE--ILKLK---SLL-ST--K-RE--Q- | 689  |
| SMC3_YEAST  | 1013 | A-ER-AS-EL----DESKDSI-QDLIVKLLKQKVNVAVDSTFQKVSENFEA | 1054 |
| BICD2_HUMAN | 690  | I-TTL--R-T---VL--K---AN--KQTAEVAL-A--NLKS---KYENEK  | 719  |
| SMC3_YEAST  | 1055 | VFERLVPRGTAKLIHRKNDNANDHDESIDVMDAESN-ESQNGK-DSE-    | 1101 |
| BICD2_HUMAN | 720  | AMVT--E-TM---MKLRNE-L--KALKEDAATFSSLRAM-FATR-CD--E  | 756  |
| SMC3_YEAST  | 1102 | IMYTGVSISVSFNK--QNEQLHVEQLSGGQKTVCAI-ALILAIQMVPAS   | 1149 |
| BICD2_HUMAN | 757  | -YITQLDEMQRQLAAAEDEK-KT-LNSLLR-M---AIQKQKALTRLELL   | 799  |
| SMC3_YEAST  | 1150 | FYL--FDEID---AAL-DKQYRTAVATLLKELSKNA--QFICTTFRDML   | 1191 |
| BICD2_HUMAN | 800  | EL-D-----HE---QT-----RR---G--R-A-K-A                | 813  |
| SMC3_YEAST  | 1192 | QVADKFFRVKYENKISTVIEVNRREEAIGFIRGSKNFA              | 1228 |

Name 1: TAF1\_HUMAN  
Name 2: TAF1\_DROME

Transcription initiation factor TFIID subunit 1 OS=Homo sapiens GN=TAF1 PE=1 SV=2  
Transcription initiation factor TFIID subunit 1 OS=Drosophila melanogaster GN=Taf1 PE=1 SV=3

Needed for following interaction(s):  
fly\_genetic RASK\_HUMAN TAF1\_HUMAN KRAS TAF1 RAS1\_DROME  
TAF1\_DROME

Length sequence 1: 1872  
Length sequence 2: 2129

|                                |     |                                                     |     |
|--------------------------------|-----|-----------------------------------------------------|-----|
| Sequence #1: TAF1_HUMAN        | 21  | M-SD-TDSDEDSAGGPFSLAGFLFGNINGAGQL----EGE---SV-LDD   | 60  |
| Sequence #2: TAF1_DROME        | 3   | MESDNSD-DEGSIGNG-LDLTGLFGNIDSEGRLLQDDDGEGRGGTGFDA   | 50  |
| Length #1: 2207                |     |                                                     |     |
| Length #2: 2207                |     |                                                     |     |
| Matrix: BLOSUM62               |     |                                                     |     |
| Gap open: 2.0                  |     |                                                     |     |
| Gap extend: 1.0                |     |                                                     |     |
| Length: 2207                   |     |                                                     |     |
| Identity: 1067/2207 (48.35%)   |     |                                                     |     |
| Similarity: 1373/2207 (62.21%) |     |                                                     |     |
| Gaps: 487/2207 (22.07%)        |     |                                                     |     |
| Score: 5198.00                 |     |                                                     |     |
| TAF1_HUMAN                     | 21  | M-SD-TDSDEDSAGGPFSLAGFLFGNINGAGQL----EGE---SV-LDD   | 60  |
| TAF1_DROME                     | 3   | MESDNSD-DEGSIGNG-LDLTGLFGNIDSEGRLLQDDDGEGRGGTGFDA   | 50  |
| TAF1_HUMAN                     | 61  | ECKKHLGALGALGSLITE---L-TA-----NEE-----LTGTDG        | 92  |
| TAF1_DROME                     | 51  | ELRENI--GSLKGLDMSLLEVIDLKEAEPSPDDEEEDARPSAVSASEG    | 99  |
| TAF1_HUMAN                     | 93  | ----AL--V-NDEGWVRSTEDAVDYSINEVAEDESRRYQQTMGSLQP     | 133 |
| TAF1_DROME                     | 100 | MSAFDALKAGVKREDGAVKAQDDAIDYSDITELSD-CPR---T---PP    | 141 |
| TAF1_HUMAN                     | 134 | LCH--SDYDED-DYDA-----DC---EDIDCK-LMPPPPPPPGPMKDK    | 170 |
| TAF1_DROME                     | 142 | --EETSTYD-DLE-DAIPASKVEAKLTKD-D-KELM---PPSAPMRSGS   | 182 |
| TAF1_HUMAN                     | 171 | DQDSITGE--KV-DFSSSDSESEMGPQEAQAESEDG--KL-TLPLAGI    | 214 |
| TAF1_DROME                     | 183 | G-GGIE-EPAKSNDASSPSD-DS-----KST--DSKDADRKLDT-PLA--  | 219 |
| TAF1_HUMAN                     | 215 | MQHDATKLLPS-----VTELFPEFRPGKVLRFRLFGPGK--NVPSVWR    | 256 |
| TAF1_DROME                     | 220 | ---D---ILPSKYQNVDRLELFPDFRPQKVLRFSLFGPGKPTSLQIWR    | 263 |
| TAF1_HUMAN                     | 257 | SARRKRKKHRELIO-EEQIQEVBC--SVES----EVSQK---SLWNYDY   | 296 |
| TAF1_DROME                     | 264 | HV-RKRRRK-RN--QSRDQ-KTNTTGGG-DSPSDTEEPKRGFSL--H-Y   | 304 |
| TAF1_HUMAN                     | 297 | APPPPPQCLSDDEITMAPVESKF-SQST---G-DID-KVTDTKPRVAE    | 340 |
| TAF1_DROME                     | 305 | AAEPTPAECMSDDEDKLLG--D--FNSEDVRPEGPD-NGENSQKPKVAD   | 349 |
| TAF1_HUMAN                     | 341 | WRYGPARLWYDMLGVPEDGSGFDYGFKLR--KTEHEPVIKSRMIEEFRKL  | 388 |
| TAF1_DROME                     | 350 | WRFGPAQIWIYDMLVPSDSEGFNYGFKTKAASTSQPQLK---DE-RRV    | 394 |
| TAF1_HUMAN                     | 389 | E--ENNGTD-LLADENFLMVTQLHWEDDIIWDGEDVK---HK-GTKPQR   | 430 |
| TAF1_DROME                     | 395 | KSPEDDVEDPSIADDAFLMVSQHLHWEDDVVWDGNDIKAKVLQKLNK-TN  | 443 |
| TAF1_HUMAN                     | 431 | ASLAGWLPSSMTRNAMAYN-----V-----QGF-AAT--LDDD---      | 461 |
| TAF1_DROME                     | 444 | A--AGWLPSSGSRTAGAFSQPGKPSMPVSGSSKQSGSASKKAQQNAQA    | 491 |
| TAF1_HUMAN                     | 462 | KP-----WYSIFPIDNEDLVYGRWEDNIIWDAQMPRLLEP-P-VLTL     | 502 |
| TAF1_DROME                     | 492 | KPAEAPDDTWYSLFPVENEELIYKWEDEVWDAQQVSKV--PKPKVLT     | 539 |
| TAF1_HUMAN                     | 503 | DPNDENLILEIPDE---K-EEATSNSPSKESK-KESSLKSRILLGKTG    | 546 |
| TAF1_DROME                     | 540 | DPNDENIILGIPDDIDPSKINKST-GPPPK--IKIPHPVKKSKILLGKAG  | 587 |
| TAF1_HUMAN                     | 547 | VIK---EE--PQQNMSQPEVKDPWNLSNDEYYYPK-QQGLRGTFGGNIIO  | 590 |
| TAF1_DROME                     | 588 | VINVLAEPTPPPPKPS-PD-RDPFNIISNDTYTPTKTEPTLRKLVGGNLIQ | 635 |
| TAF1_HUMAN                     | 591 | HSIPAVELRQPFPPTHMGPIKLRQFHRPPLKYSFGALSQPG-PHSVQPL   | 639 |
| TAF1_DROME                     | 636 | HSTPVVELRAPFVPTHMGPMKLRFAHRPPLKYSHGPMQAQ-SIPHPVFPL  | 684 |
| TAF1_HUMAN                     | 640 | LKHKKKAKMREQERQASGGEMFFMRTPQDLTGKDGDLILAEYSENGP     | 689 |

|            |      |                                                     |      |
|------------|------|-----------------------------------------------------|------|
| TAF1_DROME | 685  | LKTI AKKAKQREVERIASGGGVDFMRNPEDLSGRDGLVLAEFCEEHP    | 734  |
| TAF1_HUMAN | 690  | LMMQVGMATKIKNYKRKPGKDPGAP-DCKYGETVYCHTSPFLGSLHPGQ   | 738  |
| TAF1_DROME | 735  | LINQVGMCSKIKNYKRKAEDKSG-PQDFVYGEVAFHTSPFLGILHPGQ    | 783  |
| TAF1_HUMAN | 739  | LLQAFENNLFRAP1YLHKMPETDFLIIRTRQGYIYRELVD-IFVVGQQCP  | 787  |
| TAF1_DROME | 784  | CIQAIENNMRYAPIYPHKMAHNDFLVIRTRNNYWIRS-VNSIYTVGQBCP  | 832  |
| TAF1_HUMAN | 788  | LFEVPGPNSKRAN--THIRDFLVFIYRLFWSKDRPRRIRMEDIKKAFP    | 835  |
| TAF1_DROME | 833  | LYEVPGPNSKRANNFT--RDFLVFIYRLFWSRDNPRRIRMDDIKQAFP    | 880  |
| TAF1_HUMAN | 836  | SHSESSIRKRLKLCADFKRTGMDSNWVWLKSDFRLPTEEEIRAMVSPQOC  | 885  |
| TAF1_DROME | 881  | AHSESSIRKRLKQCADFKRTGMDSNWVWIKPEFRLPSEEEIRAMVSPQOC  | 930  |
| TAF1_HUMAN | 886  | CAYYSMIAAEQRLKDAGYGEKSF-FAPEEENEEDFQMKIDDEVRTAPWNT  | 934  |
| TAF1_DROME | 931  | CAYFSMIAAEQRLKDAGYGEK-FLFAPQEDDDEEAQLKLDDEVKVPWNT   | 979  |
| TAF1_HUMAN | 935  | TRAFIAAMKGKCLLEVTGVADPTGCGEGFSYVKIPNPKTQKKDDKEQPQV  | 984  |
| TAF1_DROME | 980  | TRAYIQAMRGKCLLQSGPADPTGCGEGFSYVRVFNKPTQTKEEQESQP-   | 1028 |
| TAF1_HUMAN | 985  | KKTVTGTADLRLRLSLKNAKQLLRKFGVPEEEIKKLSRWEVIDVVRTMST  | 1034 |
| TAF1_DROME | 1029 | KRSVTGTADLRLRLPLQRAKELLRQFKVPEEEIKKLSRWEVIDVVRTLST  | 1078 |
| TAF1_HUMAN | 1035 | EQARSG-EGPMSKFGARSRFVAEHQERYKEECQRFIDLQNKVLSSTEV    | 1083 |
| TAF1_DROME | 1079 | EKAKAGEEG-MDKFSRGNRFSIAHQERYKEECQRFIDLQNRVLASSEVL   | 1127 |
| TAF1_HUMAN | 1084 | STD-TDSSAEDSDFEEMGKNINMLNKKTSQLSREREERQERKELQRM     | 1132 |
| TAF1_DROME | 1128 | STDEAESSASEESDLLELGNLENMLSNKKTSQLSREREELERQELLRQ    | 1177 |
| TAF1_HUMAN | 1133 | L-----LAAGS-AASGNHRDDDTASVTSLNSSATGRCLKIYRTFRDEE    | 1175 |
| TAF1_DROME | 1178 | LDEEHGG-PSGSGGAKGAKGKDDPGQQLATNNQ--GRILRITRTRFRGND  | 1224 |
| TAF1_HUMAN | 1176 | GKEYVRCETVRK-PAVIDAYVRI RTTKDEEFIRKFA-LFDEQHREEMRKE | 1223 |
| TAF1_DROME | 1225 | GKEYTRVETVRRQP-VIDAYIKIRTTKDEQFIKQFATL-DEQQKEEMKRE  | 1272 |
| TAF1_HUMAN | 1224 | RRRIQEQLRRLKRNQEKEKL-----K---G-P-----P-----         | 1247 |
| TAF1_DROME | 1273 | KRRIQEQLRRIKRNQERERLAQLAQNQKLPQGGMPTSLGDPKSSGGHSHK  | 1322 |
| TAF1_HUMAN | 1248 | EK---K---P---KKMKERPDLKLCGACGAIGHMRTNKFCEPLY--YQTN  | 1286 |
| TAF1_DROME | 1323 | ERDSGYKEVSPSRKKFKLKPDLKLCGACGQVGHMRTNKAAPLYSGMQSS   | 1372 |
| TAF1_HUMAN | 1287 | APPSNP-VA--MTEEQEELEKTVIHNDNEELIKVEGTKIVLGKQLIE--   | 1331 |
| TAF1_DROME | 1373 | LSQSNPSLADDF-DEQSEK-EMTM---DDDDLNVVDGTVLSSKILKRH    | 1417 |
| TAF1_HUMAN | 1332 | SADE-VRR---KS-LVLKFPKQQLPPKRRVGTTVHCDYLNRPK-KSIH    | 1375 |
| TAF1_DROME | 1418 | GGDDGKRRSGSSSGFTLKVPRDAM-GKKKRRVGGDLHCDYLQR-HNK TAN | 1465 |
| TAF1_HUMAN | 1376 | RRRTDPMVTLSSILESII-NDMRDLPNTYFPFHTPVNAKVVKDYKIIITRP | 1424 |
| TAF1_DROME | 1466 | RRRTDPVVVTLSSILE-IIHNELRSMPDVSPFLFPVSAKKVPDYRVRTKP  | 1514 |
| TAF1_HUMAN | 1425 | MDLQTLRENVKRRLYPSREEFREHLELIVKNSATYNGPKHSLTQI-SQSM  | 1473 |
| TAF1_DROME | 1515 | MDLQTMREYIRQRRYTSREMFLEDLKQIVDNSLIYNGPQSAIT-LAAQRM  | 1563 |
| TAF1_HUMAN | 1474 | LDLCEKLEKEDKLARLEKAINPLLDDDDQVAFSFDLNDIVTQ-KMMAV    | 1522 |
| TAF1_DROME | 1564 | FSSCFELLAEREDKLMRLEKAINPLLDDDDQVALSFIFDKLHSQIKQL--  | 1611 |

|            |      |                                                      |      |
|------------|------|------------------------------------------------------|------|
| TAF1_HUMAN | 1523 | PDSWPFHHPVNNKFFVPDYKVI VNPMDLETIRKNIKSKHKYQSR-ESFLDD | 1571 |
| TAF1_DROME | 1612 | PESWPFLLKPVNNKQVKDYTVIKRPMDELETIGKNI EAHRYHSRAE-YLAD | 1660 |
| TAF1_HUMAN | 1572 | VNLILA-NSVKYNGPESQYTKTAQEI VNVCIY-OT-LTEYDEHLTQLEKDI | 1618 |
| TAF1_DROME | 1661 | IELI-ATNCEQYNGSDTRYTKFSKKILE--YAQTQLIEFSEHCQLENNI    | 1707 |
| TAF1_HUMAN | 1619 | CTAK--EAALEEA-EL-ESL--DP--MTPGPYTPQP-PDLY-D-----     | 1651 |
| TAF1_DROME | 1708 | --AKTQERARENAPFEDEAWGNDYDFRGRSRASSPGDD-YIDVEGHGGH    | 1754 |
| TAF1_HUMAN | 1652 | ---TNTSL--SMSRDA-SVFQDESNM--SVLDIPSATP---E-----      | 1682 |
| TAF1_DROME | 1755 | ASSSN-SIHRSMGAEAGS-----SHTAPAVRK-P-APPGPEVKRGRGRP    | 1796 |
| TAF1_HUMAN | 1683 | -KQ---VTQE--GED---GDG---D-LADEEEGTVQQPQASVLY---E     | 1714 |
| TAF1_DROME | 1797 | RKQRDPV-EEVKSQNPVGRGRPRKDSLASNMSHT---QA---YFLDE      | 1838 |
| TAF1_HUMAN | 1715 | DLLMS-EGEDD--EED-----AGS--DEEGD--N-P-----F-          | 1738 |
| TAF1_DROME | 1839 | DLQCSTDDDEDEEEDFQEVSEDENNAASILD-QGERINAPADAMDGMFD    | 1887 |
| TAF1_HUMAN | 1739 | -----SAI-----QLSES--G-SDS---D--V---GSGGIRPKQPRMLQ    | 1766 |
| TAF1_DROME | 1888 | PKNIKTEIDLEAHQMAEEPIGEDDSQQVAEAMVQLSGVGGYYAQQ-Q--Q   | 1934 |
| TAF1_HUMAN | 1767 | ENTRMDME-N-EES--M-MSY-EGDG-GEASHGLED--SNISYGSYEEDP   | 1807 |
| TAF1_DROME | 1935 | DES-MDVPDNPYDPSDFLAM-HKQRQSLGEP-SLQGAFTN--FLSHEQDD   | 1979 |
| TAF1_HUMAN | 1808 | --PKSN-TQ-DTSFSSIG---GYEVS-----E-----EEE-            | 1830 |
| TAF1_DROME | 1980 | NGP-YNPAEASTSAAS-GADLGMDASAMQMAPEMPVNTMNGMGIDDDL     | 2027 |
| TAF1_HUMAN | 1831 | D--EEEEQRSGPSVLSQVHLSEDE--EDSEDF---H-SI---AGSDL-     | 1868 |
| TAF1_DROME | 2028 | DISESEED-DG---SRVRIKK-EVFDDG-DYALQHQQMGQAASQSIY      | 2070 |
| TAF1_HUMAN | 1869 | --D-SDE                                              | 1872 |
| TAF1_DROME | 2071 | MVDSSNE                                              | 2077 |

-----

Name 1: M3K1\_HUMAN  
Name 2: BCK1\_YEAST

Mitogen-activated protein kinase kinase kinase 1 OS=Homo sapiens GN=MAP3K1 PE=1 SV=4  
Serine/threonine-protein kinase BCK1/SLK1/SSP31 OS=Saccharomyces cerevisiae (strain ATCC 204508 / S288c) GN=BCK1 PE=1 SV=1

Needed for following interaction(s):  
yeast genetic M3K1\_HUMAN RASK\_HUMAN MAP3K1 KRAS BCK1\_YEAST  
IRA2\_YEAST

Length sequence 1: 1512  
Length sequence 2: 1478  
Sequence #1: M3K1\_HUMAN  
Sequence #2: BCK1\_YEAST  
Length #1: 1774  
Length #2: 1774  
Matrix: BLOSUM62  
Gap open: 2.0  
Gap extend: 1.0  
Length: 1774  
Identity: 503/1774 (28.35%)  
Similarity: 767/1774 (43.24%)  
Gaps: 699/1774 (39.40%)  
Score: 1704.00

|            |     |                                                   |     |
|------------|-----|---------------------------------------------------|-----|
| M3K1_HUMAN | 113 | P--HGAASRGG AHLTESVAAPDSGASSPAAAEPEKRAP----AAEPSA | 156 |
|------------|-----|---------------------------------------------------|-----|

|            |     |                                                     |     |
|------------|-----|-----------------------------------------------------|-----|
| BCK1_YEAST | 2   | PFLRKIA--GTAH-THS-RS-DSN-SS---VKFGHQ--PTSSVASTKSSS  | 40  |
| M3K1_HUMAN | 157 | AAPAGREMENKETLKLGLHKMDDRPEERMIREKL-KATCMP-AWKHEWLER | 204 |
| BCK1_YEAST | 41  | KSP--R-R-ATSR---KSIY--DD-----IRSQFPNLT--PNSTSSQFYE- | 73  |
| M3K1_HUMAN | 205 | RNRGRPVVVKPIP-VKGDGSEMNLAA---ESPGEVQASAASPAS-KGRR   | 249 |
| BCK1_YEAST | 74  | -ST--PVIEQSFNWTT-D---DHISAGTLENP---TSFTN--SSYKNDN   | 110 |
| M3K1_HUMAN | 250 | SPSPGN-SPSGRTVKSESPEGVRRKRVPVFPQSGR-ITPPRRAPSPDGF   | 297 |
| BCK1_YEAST | 111 | GPS--SLSDS-R--KS-SGG---NSVNSLSFD--KLIL-----SWD---   | 140 |
| M3K1_HUMAN | 298 | PYSPEE-TNRRV-N--KVMR--ARLYLL----QOI-GPNSF--LIGGDSP  | 334 |
| BCK1_YEAST | 141 | PTDPDEWTHMHRVTSWFK-FHDFPESWILFFKKHQLFG-HRFIKLL---AY | 185 |
| M3K1_HUMAN | 335 | DN--KYRVFIGPONCSCARGTFCIHLLFVMLRVFQLEPSPDMLWRKTL-K  | 381 |
| BCK1_YEAST | 186 | DNFAVYEKYL-PQT-KTA--SY-----TR-FQ-Q---LL-KKTMTK      | 216 |
| M3K1_HUMAN | 382 | NFEV-ESLFQKYHSR-RS-SRIKAPSRN---TIQKFVSRMSNSHT---LS  | 422 |
| BCK1_YEAST | 217 | N--VTNS-----HIRQKSASKLKS-SRSSSESI-K--SKLKNSKSQEDI-  | 254 |
| M3K1_HUMAN | 423 | SSSTSTSSSENSIKDEEEQMCPICLLGLMDEESLTVCEJGCRNKLH----  | 468 |
| BCK1_YEAST | 255 | SNRSST--SESALS-----P-TKSG---PSKT---DE-KNFLHSTST     | 286 |
| M3K1_HUMAN | 469 | HH-CMSIWAEEC-RRNREPLICPLCR-SKWRSHDFYSHELSSPVDSPSSL  | 515 |
| BCK1_YEAST | 287 | HQTKTS--ASSLYRRS---FI-SL-RGSS--S---SN-ASS-AKSPSNI   | 321 |
| M3K1_HUMAN | 516 | R-A--AQ-----Q-QTV-QQ-QPLAG---S--RR-----NQESN-FN-    | 540 |
| BCK1_YEAST | 322 | KLSIPARPHSIIIESNSTLTKSASPPASPSYPSIFRRHHKSSSESLLNS   | 371 |
| M3K1_HUMAN | 541 | LTHYGT--QQIPPAYKDLAEPWIOVFG--M--E-LV-GCLFSRNW--NV   | 579 |
| BCK1_YEAST | 372 | L--FGSGIGEE-APT-K--PNP--Q--GHSLSSENLAGK--KSKHYETNV  | 409 |
| M3K1_HUMAN | 580 | REMAIRR--L--SHDVGALLLAN---GES-TG---NSGG---SSGSSPS   | 615 |
| BCK1_YEAST | 410 | --SSPLKQSSLPTSDD-KGNLW--NKFKRKSQIGVPSPTVAVYVTSQETPS | 455 |
| M3K1_HUMAN | 616 | GGATSGSS-QT-SI-SGDV-VEA-CCS---V-----LSMVCA-D-PVY    | 648 |
| BCK1_YEAST | 456 | --LKSNSSTATLTVQTADVNIPIPSSSPPPIKPTANRSLEVISTEDTP--  | 501 |
| M3K1_HUMAN | 649 | KV--YVAALK-TLRAMLVYTP-CHSL-AER---IKL--QR-----LL-Q   | 681 |
| BCK1_YEAST | 502 | KISSTTASFKET-----Y-PDC--INPDKTVPPVNNQKYSVKNFLLDQ    | 542 |
| M3K1_HUMAN | 682 | ---PV---V-DT---ILV-KCADANSRTSLSISTLLELCKGQAGELA     | 718 |
| BCK1_YEAST | 543 | KFYPLKKTGLNDSENKIYLVTK--D-N--VS-F-VP--LNL-KSVA-KLS  | 581 |
| M3K1_HUMAN | 719 | VG-RE-IL-KAGSIGIG--GV-----DYVLNC-ILG---NQT-ESNNW-   | 751 |
| BCK1_YEAST | 582 | -SFKESALTK---LGINHKNVTFHMTDF--DCDI-GAAIPDDTLE---FL  | 621 |
| M3K1_HUMAN | 752 | -QEL-L---GRLCLI-DRILLE---FPAEFYPHIVS-TDVSQAEPVE-IR  | 790 |
| BCK1_YEAST | 622 | KKSLFLNLTSGKI-YIKDQMKLQKPKPA--P-LTSENNV---PLKSVK    | 662 |
| M3K1_HUMAN | 791 | YK--K-----LL-----SLLTFA--LQSIDNSH-SMVGKLS-RRYI--    | 820 |
| BCK1_YEAST | 663 | SKSSMRSGTSSLIASDDVSIIVTSSSDITSFD-EHAS--G--SGRR-YPQ  | 706 |
| M3K1_HUMAN | 821 | LSS---ARMVT-TVP--HV-F-S-KLLEMLSVSSSTHFTMRRLMAIAD    | 861 |
| BCK1_YEAST | 707 | TPSYYYDR-VSNTNPTEELNYWNIK--EVLS-----H---EEN---AP    | 740 |

|            |      |                                                      |      |
|------------|------|------------------------------------------------------|------|
| M3K1_HUMAN | 862  | E-V-EIAEAIQLGVEDTLDGQQDSFLQASVPPNNYLET--TEN-S-SP-EC  | 904  |
| BCK1_YEAST | 741  | KMVFKTSPKLELNLPD--KG---SKL--NIP-----TPITENESKSSQF-   | 777  |
| M3K1_HUMAN | 905  | TVHLEKTGKGLCATKL--S---AS--SE-DIS-ERLASISVGPSSSTT--   | 943  |
| BCK1_YEAST | 778  | -V-LRK-DEG---TEIDFNHRRSESPYTKPELAPKREAP-K--PPANTSPQ  | 818  |
| M3K1_HUMAN | 944  | TTTTTTEQPKP--MVQ--TK-GRPHSQCLNSPLSHHSQLMFPALSTP--    | 986  |
| BCK1_YEAST | 819  | RTLSTSRQNKPIRLVRASTKISR--SK--RSKPLP--POL---LSSPIE    | 858  |
| M3K1_HUMAN | 987  | -SSSTP-SVPAGTA--TDVSKHRLQGFIPCRIP--SASPQTRKFSLQFH    | 1030 |
| BCK1_YEAST | 859  | ASSSSPDSL---TSSYTPASTHVL---IP-Q-PYKGAN-DVMRR--L---   | 894  |
| M3K1_HUMAN | 1031 | RNCPENKDSDKLSP-V-FTQ--SR---PLPSSN-I-HRPKP--SRPTPGN   | 1069 |
| BCK1_YEAST | 895  | KT---DQDSTSTSPSLKMKQKVNRSNSTVSTNSIFYSPLPKR---GN      | 938  |
| M3K1_HUMAN | 1070 | TSKQ-----GD--PSKNSMTL-D---L-NS-SSKCDSDFGCSSNSNA      | 1104 |
| BCK1_YEAST | 939  | -SKRVVSTSAADIF-EENDITFADAPPMPFSDDS---DDD---SS-SSDD   | 980  |
| M3K1_HUMAN | 1105 | VIPS-DETVFTPVE---E--K--CRLDVN--T---EL--NSSIEDLLEAS   | 1139 |
| BCK1_YEAST | 981  | IWSKKT--AP-ETNENKDE-KSD--NSSTHSDEIFYDSQTQDKMERK      | 1025 |
| M3K1_HUMAN | 1140 | M--PSSDTTV--T---F-----K--SE-VA-----VLSPEK-           | 1160 |
| BCK1_YEAST | 1026 | MTFRPSPV-VVYQNLKFFPRANLDKPIITEGASPTSPKSLDLSLSP-KN    | 1073 |
| M3K1_HUMAN | 1161 | -A-----E-----N-----DDTY---KDDVN--H---NQ-KC-KE-K-ME-- | 1182 |
| BCK1_YEAST | 1074 | VASSRTEPSTPRPVPDSSYEFIQDGLNGKNKPLNQAKTPKRTKTI RTI    | 1123 |
| M3K1_HUMAN | 1183 | AEEEEALAIAMASQDALPIVQLOVEN---GEDIIIIQQDTPETLP        | 1228 |
| BCK1_YEAST | 1124 | AHE-----A-SL-ARKNS--V-KLKRQNTKMWGTRMVEV---T-E---     | 1154 |
| M3K1_HUMAN | 1229 | GH---TKAK--Q-PYREDTEWLKGGQIGLGAFFSSCYAQDVGTTGLMAV    | 1271 |
| BCK1_YEAST | 1155 | NHMVSIINKAKNSKGEYKE-FAWMKGEMIGKGSFGAVYLCNLVTTGEMMAV  | 1203 |
| M3K1_HUMAN | 1272 | KQVTVYVRTSSEQEEV---VEALREEIRMSHLNHPNIIIRMLGATCE-KS   | 1317 |
| BCK1_YEAST | 1204 | KQVE-VPKYSSQNEAILSTVEALRSEVSTLKDLDHLNIVQYLG--FENKN   | 1250 |
| M3K1_HUMAN | 1318 | N-YNFLFIEMMAGGSVAHLLSKYGAFKESVVINY-TEQLLRGLSYLHENQI  | 1365 |
| BCK1_YEAST | 1251 | NIYSLFLEYVAGGSVGLIRMYGRFDEP-LIKHLTTQVLKGLAYLHSGKI    | 1299 |
| M3K1_HUMAN | 1366 | IHRDVKGA-NLLIDSTGQRL-RIADFGAAARLASKGTGAGE-F-QGQL-L   | 1410 |
| BCK1_YEAST | 1300 | LHRDMK-ADNLLLDQDQ--ICKISDFG-ISR-KSK-----DIYSNSDMTM   | 1339 |
| M3K1_HUMAN | 1411 | -GTIAF-MAPE-V-LRGQQYGRSCDVVSVGCAIEM-ACAKPPW-NAEKH    | 1454 |
| BCK1_YEAST | 1340 | RGTV-FWMAPEMVDTK-QGYSARVDIWSLGCIVLEMFA-GKRPSNLEV-    | 1385 |
| M3K1_HUMAN | 1455 | SNHLALIFKIASATTAPSIKPSH-LSP-----GLR---DVALRCLELQPD   | 1495 |
| BCK1_YEAST | 1386 | ---VAAMFKIGKSKSAPPDPEDTL-PLISQIG-RNFLD-A--CFEINPEK   | 1427 |
| M3K1_HUMAN | 1496 | RPPSRELLKHP---V-----FRFT                             | 1511 |
| BCK1_YEAST | 1428 | RPTANELLSHPFSEVNETFNFKST                             | 1451 |

-----  
Name 1: DCTN1\_HUMAN  
Name 2: NIP80\_YEAST  
Dynactin subunit 1 OS=Homo sapiens GN=DCTN1 PE=1 SV=3

Protein NIP100 OS=Saccharomyces cerevisiae (strain ATCC 204508 / S288c) GN=NIP100 PE=1 SV=2

Needed for following interaction(s):

yeast genetic PTTG1\_HUMAN DCTN1\_HUMAN PTTG1 DCTN1 SECU\_YEAST  
NIP80\_YEAST

Length sequence 1: 1278  
Length sequence 2: 868  
Sequence #1: DCTN1\_HUMAN  
Sequence #2: NIP80\_YEAST  
Length #1: 1343  
Length #2: 1343  
Matrix: BLOSUM62  
Gap open: 2.0  
Gap extend: 1.0  
Length: 1343  
Identity: 352/1343 (26.21%)  
Similarity: 544/1343 (40.51%)  
Gaps: 608/1343 (45.27%)  
Score: 1042.00

|             |     |                                                     |     |
|-------------|-----|-----------------------------------------------------|-----|
| DCTN1_HUMAN | 11  | RTPSG---SRMSAEASARPLR--VGSRV-EVIGKGRGTVAIVYGATLFA   | 53  |
| NIP80_YEAST | 2   | RN-AGVQVDTNMQ-KIS---LQDTV--LVNEM--KG-R--VKFIGETQFA  | 39  |
| DCTN1_HUMAN | 54  | TGKVVGVILDEAK--GKNDGTVOG-RKYFTCD--E----G-HGIFVRQS   | 92  |
| NIP80_YEAST | 40  | KGIWYGIELD--KPLGKNDGSANGIR-YFDIDLKANSNGGYGLFCKKD    | 86  |
| DCTN1_HUMAN | 93  | QIQVFEDGADTTPSPETPDSSASKVLKREGTDTTAKTSKLRGLKPKKAPTA | 142 |
| NIP80_YEAST | 87  | TLQ-FY-----K-PD-----D-D---EHSLLNG---NA--A           | 106 |
| DCTN1_HUMAN | 143 | RKTTTRRPKPTRPASTGVAGASSLGPSPGSASAGELSSSEPSTPAQTPLA  | 192 |
| NIP80_YEAST | 107 | QETI---K-----NL-----QV-KCE-S-----LA                 | 121 |
| DCTN1_HUMAN | 193 | APIIPTPVLTPSPGAVPPLPSPK-E-EGLRAQVRDLEEKL---ET-LRL   | 236 |
| NIP80_YEAST | 122 | SK-----LNK---I-----KIENHE-LKTSV---EKLSTNETVL-L      | 149 |
| DCTN1_HUMAN | 237 | -K--RAEDKAKL-KELEKHKIQLEQVQEWKSKMQEQQADLQRRLEARKE   | 282 |
| NIP80_YEAST | 150 | SKISRL-D--KLVKEL---K-----V-E-NGNM-----K-TH--        | 172 |
| DCTN1_HUMAN | 283 | AKEALEAKERYMEEMADTADAEMA-TLTK-EMAEERAESLQEQVEALKE   | 330 |
| NIP80_YEAST | 173 | ---L---DNF-NHLLDASDSV-MAPDLDKGTLT-ERSHLLQ---GL--    | 206 |
| DCTN1_HUMAN | 331 | RVDELTTDL--EILKA-EIEEKSGDGAASSYQLKQLEEONARLKDALVRM  | 377 |
| NIP80_YEAST | 207 | -LDQ--TKLSYD--KAMKVQE---D-----L--LEE-NTQL-----      | 231 |
| DCTN1_HUMAN | 378 | RDLSSSEKQEH-VKLQKLMKKNQEQLEVVRQQRERLQEEELSQAESTI-DE | 425 |
| NIP80_YEAST | 232 | --L---E--ENAV---L-SKKISDLGL---Q--LQ---QTNNTIGD-     | 258 |
| DCTN1_HUMAN | 426 | LKEQVDAALGAEMVEMLT-DRNLNLEEKVRELRETVDGLEAMNEMNDEL   | 474 |
| NIP80_YEAST | 259 | LALQIEAQSKSSNIVDKLTND-NI-L-----L--T-SNIKALN--N-EL   | 294 |
| DCTN1_HUMAN | 475 | QENARETELELREQLDMAGARVREAQRKVEAAQETVADYQOTI-KKYR-Q  | 522 |
| NIP80_YEAST | 295 | -----E-ELQAKELD-----E-NLRI---T---YEQ-LEQELRLQ       | 321 |
| DCTN1_HUMAN | 523 | LTAHLQDVNRELTNQOE-A-S-VERQQPPPETFDKIKFAETKAHAK--    | 567 |
| NIP80_YEAST | 322 | L-SNLQSA---LENEKEIAGTYIEENSR-LKATLE-SIE-AKT-SH-KFQ  | 362 |
| DCTN1_HUMAN | 568 | AIEME---LRQMEVAQANRHMSLLTAF--M--PDSFLRPGGDHDCVLVLL  | 610 |
| NIP80_YEAST | 363 | SLELKVNTL-QEELYQ-NK---LLKKFYQIYEP--FAQP--H---LA-A   | 398 |

|             |      |                                                       |      |
|-------------|------|-------------------------------------------------------|------|
| DCTN1_HUMAN | 611  | LMPRL--ICKAELIRKQAQEKF-ELSENCSE-R--PGLRGAAGEQLSFAA    | 654  |
| NIP80_YEAST | 399  | LSSQLQYL--AEVI--ES-ENFNGKL-ENI-EIHII--LK-VL-SSISYA-   | 436  |
| DCTN1_HUMAN | 655  | GL-VYSLSLQLQAT--LHRYEHALSQC-SVDVYKVKVGSLSY-PE-M----SA | 694  |
| NIP80_YEAST | 437  | -LHIYT---IKNTPD-H-LETTL-QCFKVNII-API-SMWLSEFLQRKFSS   | 477  |
| DCTN1_HUMAN | 695  | -HER--SL-DFLIE-LLHK--DQLDETVNVEPLTKAIKYQHLYSIHLAE     | 737  |
| NIP80_YEAST | 478  | KQETAFSICQFL-ED--NKFLDK-DVTL-I--L-K-I-----LHPI-L-E    | 511  |
| DCTN1_HUMAN | 738  | Q--PEDCTMQLADHIKFTQSAL----D-CMSVEVGRRLRAFLQGGQEATDI   | 780  |
| NIP80_YEAST | 512  | TTVPK---L-LA-FLR-TNSNFNDNDTLCL---IGSL--Y-----ERS-L    | 544  |
| DCTN1_HUMAN | 781  | ALLLR-D-L----ETSCSDIRQFCKKIRRRMPGTDPAGIPAALA--FGPQ    | 822  |
| NIP80_YEAST | 545  | SLIARIDKLGKKEISKQDNRLF---L---YPSCDIT-LSSILITLF---     | 584  |
| DCTN1_HUMAN | 823  | VSDTL-L--DCRKHLTWVAV--LQEVAAAAQLIAPLAENGLLVAALE       | 867  |
| NIP80_YEAST | 585  | -SDALFLRQD-YKRIS---SLKKL-EV---FFQGIESLLEN--ITI--FP    | 621  |
| DCTN1_HUMAN | 868  | ELAFKASEQIYGTTPSSSPYECLRQSCNLIISTMNKLATAMQEGEY-D---   | 913  |
| NIP80_YEAST | 622  | E---QPSQQ---T-SDS--E--SQ-CNI-----K-----EGNFSNSLL      | 647  |
| DCTN1_HUMAN | 914  | AERPPSKPPVPE-LRAAALRAEI-TDAEGLGL-KLEDR-ETVI-KEL-KK    | 957  |
| NIP80_YEAST | 648  | SDR-LNE---ENIR---LK-EVLVQKENM-LTELETKIKIIIGRDLERK     | 687  |
| DCTN1_HUMAN | 958  | SLKIKGEELSEANVRLSLEK-KLDSAADADERIEKVQTRLEETQALLR      | 1006 |
| NIP80_YEAST | 688  | TL---EE---NIK-TL--KVELNN--KN-EENCGK--T--E---ILN       | 715  |
| DCTN1_HUMAN | 1007 | K-KEKEFE----ETMD-AL-Q-AD---IDQ--LEAEKAEKQLRNSQSK      | 1042 |
| NIP80_YEAST | 716  | KLKEENFNLVRLKNNMELKLYQIKDNNTLNKIYLDREKVD---RVNLVSE    | 762  |
| DCTN1_HUMAN | 1043 | RTI-EGLRGPSPGIATLVSGIAGEEQRGAIPGQAPGSPVPGPLVKD-S      | 1090 |
| NIP80_YEAST | 763  | --IME-LR-----ETIRROI--KEQKR--V-----SI-----DFS         | 785  |
| DCTN1_HUMAN | 1091 | PLLQIQISAMRLHISQLQHENSILKGAQMKAASLASLPL--HVAKLSHEG    | 1138 |
| NIP80_YEAST | 786  | --WLDELPA---V-----EN---K--Q-----PFKEHI--NH--          | 805  |
| DCTN1_HUMAN | 1139 | PGSELPAAGALYRKTSQL-LETNLQLSTHVVVDITR-TSPAASKSPSAQLM   | 1186 |
| NIP80_YEAST | 806  | --S-----L--DT--LGIEMFNFVST-SRILDL-KLDQPLAED---ELW     | 838  |
| DCTN1_HUMAN | 1187 | -EQ----VAQLKSLSDTVEKLDKDEV-LKETVSQRPGATVPTDF          | 1223 |
| NIP80_YEAST | 839  | HERDHSYISYK-----RKRKN-IRLK---SQN---VV-T-Y             | 866  |

Name 1: AQR\_HUMAN  
Name 2: SEN1\_YEAST

Intron-binding protein aquareius OS=Homo sapiens GN=AQR PE=1 SV=4  
Helicase SEN1 OS=Saccharomyces cerevisiae (strain ATCC 204508 / S288c) GN=SEN1 PE=1 SV=2

Needed for following interaction(s):

yeast genetic AQR\_HUMAN BLM\_HUMAN AQR BLM SEN1\_YEAST  
SGS1\_YEAST

Length sequence 1: 1485  
Length sequence 2: 2231  
Sequence #1: AQR\_HUMAN  
Sequence #2: SEN1\_YEAST  
Length #1: 2164  
Length #2: 2164

Matrix: BLOSUM62

Gap open: 2.0

Gap extend: 1.0

Length: 2164

Identity: 570/2164 (26.34%)

Similarity: 849/2164 (39.23%)

Gaps: 952/2164 (43.99%)

Score: 1759.00

|            |     |                                                      |     |
|------------|-----|------------------------------------------------------|-----|
| AQR_HUMAN  | 5   | AQPK-KIV---A-----PTVSQLNAEFVTQLACKYW---A--PHIKKK-S   | 39  |
| SEN1_YEAST | 125 | ARGCKMQLQHFQAIQRHVPVH-EHV-AKF-NDIVCQ-WRVEAVFP-ILRNIS | 169 |
| AQR_HUMAN  | 40  | PFDF---IKV---IED-IYE-----KEIVKSRF-AIRKIMLLEFS        | 70  |
| SEN1_YEAST | 170 | VNDNTGINITNEIETAMYECCLNPHMLRLNLKQL-KATFEAIFKF---F-   | 213 |
| AQR_HUMAN  | 71  | OYLE-NY-LWMNY-SPEVSSKAYLMS--I-C-CMVNE--KFRENVPAW-E   | 110 |
| SEN1_YEAST | 214 | -Y-DTKHRL-LDVTNP-LSIKTFI-SGVIFCWC---EGSK-EEN--EWSR   | 252 |
| AQR_HUMAN  | 111 | IFKKKPDHFPPF---FKHI-LKAALAET-D--GE-FSLHEQTVLLFLDH    | 152 |
| SEN1_YEAST | 253 | AFLK--D---LYSRNF-HINL-SNL--TPDIIEEVY-IH-----ILFLQN   | 287 |
| AQR_HUMAN  | 153 | -CFN-SLEVDLIRSQV-QQLISLPMWML-----QLAR-LELELK         | 188 |
| SEN1_YEAST | 288 | PA-NWT-EI-VV-SQFWSRL--LPVF-NLFDKDVFIIEYFQVKNVE-SLK   | 329 |
| AQR_HUMAN  | 189 | KT---PKLR---KFW-N-LIKK-NDEKMDP-E--AR-----EQAY-QER    | 219 |
| SEN1_YEAST | 330 | KTFKFP-LEPIFKMWYNHLSKSYHD-K--PLDFLLRGLTMFLNK-FGSE-   | 373 |
| AQR_HUMAN  | 220 | RFLSQLIQKF-I-SVL-----K-SVP--L---SE-PVTMDKVHYCERFIE   | 255 |
| SEN1_YEAST | 374 | -FWSK-IEPFTFHSILDIIIFNRDSFPIKLIKIQDNPI-VE--HQTEVYFQ  | 418 |
| AQR_HUMAN  | 256 | L--MI-DL-----EALPT-R---R---W-F-NTILD-DSHL-LV-        | 281 |
| SEN1_YEAST | 419 | LTGSVTDLLSWTLPPFYHALSPSKRIQMVKVSMAFLRIIANYP-SLKSI    | 467 |
| AQR_HUMAN  | 282 | -HCYLSN-----LVR-----R-----E-E-----DGH-LFSQ-          | 300 |
| SEN1_YEAST | 468 | KAC-LMNSATALLRAVLTIKENERAMLYKNDDEFVLLTKTDSRALNNP     | 516 |
| AQR_HUMAN  | 301 | LL-D-MLK-----FYTGFEINDQTG--NA-L-TENEMT---TIHYDRI     | 334 |
| SEN1_YEAST | 517 | LIQDIIIRSASNPNDFYPG--L---GAASASVATSTMVLAECIDFD-I     | 559 |
| AQR_HUMAN  | 335 | TSLQRAAFAH--FPELY-----DFALS-NVAE-VDTRE-SLVK-FF-GP    | 371 |
| SEN1_YEAST | 560 | --L---LLCHRTF-KLYSGKPISEIPISTNVLENV-TNKIDL-RSFHDGP   | 601 |
| AQR_HUMAN  | 372 | -LSSNTLHQVASYL--C--LLPTLPKN---E-DTTFDKFELLELLVS-R    | 410 |
| SEN1_YEAST | 602 | LLAKQLL--V-S-LKNINGLL-IVPSNTAVAEAHNALNQKFL--LL-STR   | 643 |
| AQR_HUMAN  | 411 | -HERRISQI--QQLNQMPLYPTEKI---IW-----DENI--VPTE--Y-    | 443 |
| SEN1_YEAST | 644 | LME-KFADILPGQLSKI-L-AEDASQGFWSICFSSDKHLYQAATNILYN    | 690 |
| AQR_HUMAN  | 444 | -Y--SG--EGCLALPKLNLQFLTLHDYLLRNFN--LFRL--ESTYE---    | 480 |
| SEN1_YEAST | 691 | TFDVEGRLEGILAI--LNSN-LTVN---LKNINVMLQRLINCE-FYEPFPC  | 733 |
| AQR_HUMAN  | 481 | --IR--QD-IE---D--S-V--S-R-MKPQWS---EYGGVVFGGWAR--M   | 510 |
| SEN1_YEAST | 734 | RAVRVLMVVSAFVDPISGVFANFQTLKS-QNTEKEF--LKF--WESCWL    | 778 |
| AQR_HUMAN  | 511 | -AQPIVAFTVVE-VAK---PNIGENW--PT----R--V---R--ADV---   | 539 |
| SEN1_YEAST | 779 | FLDTIKYFT-LKWASKYDYSEL--ENFTKDTLDLSRSLVDSFREFSDILHD  | 826 |
| AQR_HUMAN  | 540 | -TIN--LNVRDHKID--EWEGLRKH-D-V---CF-LI--T-----VR      | 568 |

|            |      |                                                     |      |
|------------|------|-----------------------------------------------------|------|
| SEN1_YEAST | 827  | QTKNLLLNVLTFKNNMLYW--LRLSDEVLLSECVRLIISTSDLAHEKHVK  | 874  |
| AQR_HUMAN  | 569  | --PT-----KPYGTFKDRRRPF--I-EQ---VGL---VYVRGC--E      | 596  |
| SEN1_YEAST | 875  | VDDSLVEMMAK-YASK--AKR-FSNKLTQEQASEI-LQKAKIFNKALTEE  | 919  |
| AQR_HUMAN  | 597  | I---QGMLDDK-----GRVIE--DG-P-EP--RPNL-----RGESRT     | 624  |
| SEN1_YEAST | 920  | VATEAENYRKEKELSRGLKVIDLTDTSVFPASPSPSLSTSIASSAESRA   | 969  |
| AQR_HUMAN  | 625  | -F--RVFLD-----PNQYQODMTN--TIQ---NGAEDVYETFN-I--I-   | 656  |
| SEN1_YEAST | 970  | DYLQRKALSSSITGRPRVAQPKITSFGTFQSSAN-AK-LHRT-KPVKPLS  | 1016 |
| AQR_HUMAN  | 657  | -M--R-----R-----KP---K-----EN-----N-----            | 665  |
| SEN1_YEAST | 1017 | KMELARMQLLNNRVVHPPSAPAFHTKSRGLSNKNDDSSSESDNDIESAR   | 1066 |
| AQR_HUMAN  | 666  | --F--KAV---LET--I-----R-----NL--M-----NTDCVVP       | 684  |
| SEN1_YEAST | 1067 | ELFAIAKAKGKGIQTVDINGKVVKRQTAAELAKQELEHMRKRLNVD-MNP  | 1115 |
| AQR_HUMAN  | 685  | DWLHDIIIL-----G-Y-GD-P-----S-----S-AHYSK-M-P---     | 706  |
| SEN1_YEAST | 1116 | --LYEIIQLQWDYTRNSEYDPDEPIGNYSDVKDFNFSPADYQKVMKPLLLL | 1163 |
| AQR_HUMAN  | 707  | -N-Q-I-ATLDFND--TFLSIEHL---K-A-S-FPGHNV-----K-VTVE  | 738  |
| SEN1_YEAST | 1164 | ESWQGLCSSRDREDYKPF-SI--IVGNRTAVSDF--YDVYASVAKQV-IQ  | 1207 |
| AQR_HUMAN  | 739  | D---PA-L---QIPPPRITFP-VR-SG---KKGK-----K-R--KD-     | 763  |
| SEN1_YEAST | 1208 | DCGISESDLIVMAYLPDFR---PDKRLSSDDFK-KAQHTCLAKVRTLKNT  | 1253 |
| AQR_HUMAN  | 764  | --ADVEDEDT-----EE-AK--TL---I--VEPHV-----IPNR-----   | 787  |
| SEN1_YEAST | 1254 | KGGNV-DV-TLRIHRNHSFKFLTLRSEIYCVK--VMQMTTI-BREYSTL   | 1298 |
| AQR_HUMAN  | 788  | -G-PYPYN-----Q--PKR--N-----TIQ--F-THT-QIEAI-RAG     | 813  |
| SEN1_YEAST | 1299 | EGLEY-YDLVGQILQAKPSPVNVDAABEIVTKKSYKLNTSQABAVNS-    | 1346 |
| AQR_HUMAN  | 814  | M-QPGLTMVVGPPGTGKTDVAVQIISNIY---HNFPEQRTLI-V-THSN   | 856  |
| SEN1_YEAST | 1347 | VSKBGFSLIQPPGTGKTKTILGIIG--YFLSTKN-ASSSNVIVKPLEKN   | 1393 |
| AQR_HUMAN  | 857  | QALN--QLF--EKIM--A-LD--IDERHL-LRL--G-H--GEELETEK    | 890  |
| SEN1_YEAST | 1394 | SS-NTEQLLKKQKILICAPSNAAVDE--ICLRKLSGVYDKQG-HQF---K  | 1436 |
| AQR_HUMAN  | 891  | -DFSRYGR---VNYVLARRI-EL-LEE-V-KRLQKSLGVPGDASYTCE--  | 930  |
| SEN1_YEAST | 1437 | PQLVRVGRSDVVN-V-A--IKDLTLEELVDKR-----I-GERNY--EIR   | 1473 |
| AQR_HUMAN  | 931  | TAGYFFLYQVMSR-WEEYISKVKN-KGSTLPDVTSTVFPPHFHEYFANAP  | 978  |
| SEN1_YEAST | 1474 | TDP-----E-LERKFNNAVTKRRELGRK-L-D-SE-S-----GN-P      | 1503 |
| AQR_HUMAN  | 979  | Q-PIFKGRSYEED--MEIAEGCFRHIKKIFTQL---EEFR-ASEL-LR    | 1018 |
| SEN1_YEAST | 1504 | ESPM---S-TEDISKQL-K--IRELSKIINELGRDRDEMREKNSVNYR    | 1545 |
| AQR_HUMAN  | 1019 | S-GLDR--SK-YLL-VKEAKIIAMTC--THAAL--KRHD-LVKLGFKYDNI | 1059 |
| SEN1_YEAST | 1546 | NRDLDRRNAQAHILAVSD--II---CST---LSGSAHDVLATMGIKFDTV  | 1587 |
| AQR_HUMAN  | 1060 | LMEEAAQILEIETFIPLLQNPQDGFSRLLKRWIMIGDHHQLPP-VIKNMA  | 1108 |
| SEN1_YEAST | 1588 | IIDEACQCTELSSIIIP--LR--YGG---KRCIMVGDPNQLPPTVLSGAA  | 1629 |
| AQR_HUMAN  | 1109 | --FQKYSNMEQSLFTRFVRVGVPTVDLDAQGRARASL-----CNLYNWRY  | 1151 |
| SEN1_YEAST | 1630 | SNF-KY-N--QSLFVRMEKNSSPYL-LDVQYRMHPSISKFPSSEFYQGR   | 1674 |

|                                                                                                                 |                   |                                                      |            |        |      |            |
|-----------------------------------------------------------------------------------------------------------------|-------------------|------------------------------------------------------|------------|--------|------|------------|
| AQR_HUMAN                                                                                                       | 1152              | KNLG-----N-LP-HVQL--L-P-EFSTANAGLLYDFQLINVEDFQGVG    | 1189       |        |      |            |
| SEN1_YEAST                                                                                                      | 1675              | KD-GPGMDILNKRPHW-QLEPLAPYKF-----FD--IIS-----G        | 1705       |        |      |            |
| AQR_HUMAN                                                                                                       | 1190              | ESEPN--PYFYQNLGAEYV-VAL-FM-YMCLL-GY--PAD---KISILT    | 1228       |        |      |            |
| SEN1_YEAST                                                                                                      | 1706              | RQEQNAKTMSYTNM-E-E-IRVAIELVDY--LFRKFDNKIDFTGKIGIIS   | 1750       |        |      |            |
| AQR_HUMAN                                                                                                       | 1229              | TYNG--QKHLIR-DIINRRCGNPLIGRPNK-V--TTVDRFQGGQNDYIL    | 1272       |        |      |            |
| SEN1_YEAST                                                                                                      | 1751              | PYREQMQK--MRKEFA-RYFGG--MI---NKSIDFNTIDGFGQKEKEIIL   | 1792       |        |      |            |
| AQR_HUMAN                                                                                                       | 1273              | LSLVR---TR-AVGHRLDVRRLVAVMSRARLGLYIFA--RVSLFQNCFEL   | 1316       |        |      |            |
| SEN1_YEAST                                                                                                      | 1793              | ISCVRADDTKSSVGFLLKDFRRMNVALTRAKTISIWVLGHQR-SLAKS--KL | 1839       |        |      |            |
| AQR_HUMAN                                                                                                       | 1317              | TPAFSQL--TA--RP-LHLHIIPTEPF--PTRKNGERPSSHEVQ-II-K-   | 1356       |        |      |            |
| SEN1_YEAST                                                                                                      | 1840              | ---WRDLIEDAKDRSCL-AY--ACSGFLDP--RNN--R---AQSIILRKF   | 1875       |        |      |            |
| AQR_HUMAN                                                                                                       | 1357              | NMP----QMANFVYNMYM-HLIQTTHHY--HQ-TLLQLPPAMVEEGEE--   | 1396       |        |      |            |
| SEN1_YEAST                                                                                                      | 1876              | NVPVPSQEQEDD--YKLPMEYITQGPDEVKSNKDT--K-KRRVVDEGEHAD  | 1920       |        |      |            |
| AQR_HUMAN                                                                                                       | 1397              | --VQNQETELETEEEAMTVQADIIPSPD---TSCRQ-ETPAFQTD-T-     | 1438       |        |      |            |
| SEN1_YEAST                                                                                                      | 1921              | KAVKKKKKE-KKKEKKKS-KAD-----DKKKN-KKAEKSPS--TSSGTK    | 1959       |        |      |            |
| AQR_HUMAN                                                                                                       | 1439              | -PSET-GATSTPEA-IPALSETPTV-----VGAVSAPAEANTP---QD     | 1476       |        |      |            |
| SEN1_YEAST                                                                                                      | 1960              | KKSSIFGGMSVPSAVVP---KTFPDDVSNKAAA-VGKKKNNKHVCFSD     | 2005       |        |      |            |
| AQR_HUMAN                                                                                                       | 1477              | ATS-AP---E-ETK                                       | 1485       |        |      |            |
| SEN1_YEAST                                                                                                      | 2006              | DVSFIPRNDPEIK                                        | 2019       |        |      |            |
| -----                                                                                                           |                   |                                                      |            |        |      |            |
| Name 1: M3K6_HUMAN                                                                                              |                   |                                                      |            |        |      |            |
| Name 2: GCN2_YEAST                                                                                              |                   |                                                      |            |        |      |            |
| Mitogen-activated protein kinase kinase kinase 6 OS=Homo sapiens GN=MAP3K6 PE=1 SV=3                            |                   |                                                      |            |        |      |            |
| Serine/threonine-protein kinase GCN2 OS=Saccharomyces cerevisiae (strain ATCC 204508 / S288c) GN=GCN2 PE=1 SV=3 |                   |                                                      |            |        |      |            |
| Needed for following interaction(s):                                                                            |                   |                                                      |            |        |      |            |
| yeast                                                                                                           | genetic           | M3K6_HUMAN                                           | RASK_HUMAN | MAP3K6 | KRAS | GCN2_YEAST |
| IRA2_YEAST                                                                                                      |                   |                                                      |            |        |      |            |
| Length sequence 1:                                                                                              | 1288              |                                                      |            |        |      |            |
| Length sequence 2:                                                                                              | 1659              |                                                      |            |        |      |            |
| Sequence #1:                                                                                                    | M3K6_HUMAN        |                                                      |            |        |      |            |
| Sequence #2:                                                                                                    | GCN2_YEAST        |                                                      |            |        |      |            |
| Length #1:                                                                                                      | 1728              |                                                      |            |        |      |            |
| Length #2:                                                                                                      | 1728              |                                                      |            |        |      |            |
| Matrix:                                                                                                         | BLOSUM62          |                                                      |            |        |      |            |
| Gap open:                                                                                                       | 2.0               |                                                      |            |        |      |            |
| Gap extend:                                                                                                     | 1.0               |                                                      |            |        |      |            |
| Length:                                                                                                         | 1728              |                                                      |            |        |      |            |
| Identity:                                                                                                       | 444/1728 (25.69%) |                                                      |            |        |      |            |
| Similarity:                                                                                                     | 671/1728 (38.83%) |                                                      |            |        |      |            |
| Gaps:                                                                                                           | 734/1728 (42.48%) |                                                      |            |        |      |            |
| Score:                                                                                                          | 1307.00           |                                                      |            |        |      |            |
| M3K6_HUMAN                                                                                                      | 21                | LA-VALSRGRQLAAPPGRGC---A-RSRPLSVVYV-----LT-R-----E   | 54         |        |      |            |
| GCN2_YEAST                                                                                                      | 3                 | LSHLTLQYYEIT-----Q-CNELEAIRS-----IYMDDFTDLTKRKS      | 41         |        |      |            |
| M3K6_HUMAN                                                                                                      | 55                | PQPLG--E-P-REGTEAEPL--PLRCLREACAQVPR-PRPPPQLRSLPFG   | 97         |        |      |            |
| GCN2_YEAST                                                                                                      | 42                | KQPQIFEIFILR-SVDKEPVESSI-TLH--FAMTPMPYPYTAPEIE--FK   | 84         |        |      |            |
| M3K6_HUMAN                                                                                                      | 98                | TLE--LGDIT--AALDA-F---YN-A---DVVVLEVSSSLVQPSLFYHLGV  | 135        |        |      |            |

|            |     |                                                     |     |
|------------|-----|-----------------------------------------------------|-----|
| GCN2_YEAST | 85  | NVQNVN-DSQLQMLKSEFKIHNTSRGQE-IIFEI-TSFTQEKL-----    | 125 |
| M3K6_HUMAN | 136 | RESFSMTNNVLLCSQA--DLPD-LQ-----AL----RE---DVFQKNS    | 168 |
| GCN2_YEAST | 126 | -DEF---QNV-VNTQSLD--DRLQRIKETKQLEKEEREKQOETIKKRS    | 168 |
| M3K6_HUMAN | 169 | DCVGSYTLPIYVVTATGRVL---CGDAGLL--R--GLADGLVQ-----    | 204 |
| GCN2_YEAST | 169 | D---EQRRIDEIVQ---RELEKRQDDDDLLFNRTTQL-D-L-QPPSEWV   | 209 |
| M3K6_HUMAN | 205 | AGVGTEALL--TPLVGLRALLEATPTDSCGY-FRETIR-RDIRQARER    | 249 |
| GCN2_YEAST | 210 | AS-G-EAIVFSKT--I-K-AKL---PNNM-FKFKAVVNPPIKLTSDI     | 248 |
| M3K6_HUMAN | 250 | FS-GPQ-L-R---QE--LARLQRRLDSEVELLSPDIIM-NL--LLSYRVD  | 287 |
| GCN2_YEAST | 249 | FSFSKQFLVQPYIPPEPLA-----D-F-LMSSE-MMENFYLLS--EI     | 287 |
| M3K6_HUMAN | 288 | Q-D--Y---S---AI--I--ELVETLQALPTCDVAEQH-NV--CFHYTF   | 320 |
| GCN2_YEAST | 288 | ELDNSYFNSTNGKKEIANLEKEL-ETV--LK---A-KHDNVNRLFYGT-   | 328 |
| M3K6_HUMAN | 321 | ALNR--RNRPGDRKAL-SVLLPLVQLEGSVAPDLYCMCGRIYK--DMFF   | 365 |
| GCN2_YEAST | 329 | -VERMGRN---NATFVVKIRL-LT--E-----YC---NYYPLGDL-I     | 359 |
| M3K6_HUMAN | 366 | SS-GFQD-AGHREQAYHW-YRKAFD-VEPSLHS-G-----IN-AAVLLIA  | 404 |
| GCN2_YEAST | 360 | QSVGFVNLTAR---I-WMIR-LLEGLE-AIHKLGIHVHCINLETVILVK   | 403 |
| M3K6_HUMAN | 405 | -AGQHFEDSKEL-RLI---G--MKLGCLLAR---K-G-CVEKMQ-YYWD   | 440 |
| GCN2_YEAST | 404 | DA--DF-GS-TIPKLVHSTYGYTV-LN-MLSRYPNKNNGSSVE-LSPSTW- | 445 |
| M3K6_HUMAN | 441 | VGfYLGA-QILA-ND--P---T---QV-VLAEEQLYK-----LN--APIW  | 472 |
| GCN2_YEAST | 446 | I-----APELLKFNNAKPQLRTDIWQLGVLF-I-QIISGSDIVMNFETPQE | 489 |
| M3K6_HUMAN | 473 | YL--VSVN-ET-F-LLYQHFRPTPEPPGGPPRRAHFWLHFLQSQCP--F   | 515 |
| GCN2_YEAST | 490 | FLDSTS-MDETLYDLLSKMLN-N-D---PKKRLG-TLE-LL---PMKF    | 526 |
| M3K6_HUMAN | 516 | -KTACAQGDQCL--V-LVLE-MN-KVL-L-PA-KLEVRG---T---DPV   | 549 |
| GCN2_YEAST | 527 | LRTNI---DSTINRFNLVSESVNSNLELTPGDTITVRGNGGRTLSQSSI   | 573 |
| M3K6_HUMAN | 550 | ---S-TV-T-LSLLEPETQDIPSSW-T-F-PVASICGVSA--S-K-R--   | 583 |
| GCN2_YEAST | 574 | RRRSFNVGSRFSSINPATR---SRYASDFEIA-VLQGFQVGVKARNA     | 619 |
| M3K6_HUMAN | 584 | -DERCCFLYALPP---AQ-----DVQLCFPSVGHQWFCGLIQ---A      | 618 |
| GCN2_YEAST | 620 | LDSR--Y-YAIIKIRHTEKLSLSEVML-LASLNH-Q-Y--VVRYAA      | 661 |
| M3K6_HUMAN | 619 | WV---T---NP-DSTAPAE---AEGAG---E--MLE---F---DYEY     | 645 |
| GCN2_YEAST | 662 | WLEEDSMDENVFEST--DEESDLESSSSDFEENDLLDQSSIFKNRTNHDL  | 709 |
| M3K6_HUMAN | 646 | TETG-ERLVLGKGTY-GVYV--AGR---R---H-TRVRIAIKEIPERDS   | 684 |
| GCN2_YEAST | 710 | DNSNWD-FISGG-YPDIVFENSRDDEDLDHDT-S-STSSSE-SQDDT     | 755 |
| M3K6_HUMAN | 685 | -RFSQPLHEEIALHRRLRHKNIIVRYLGS-SQGGYK--IF--ME--EVP   | 726 |
| GCN2_YEAST | 756 | DKESKSI-QNVP--RR-R--NFVKPM-TAVK---KSTLFIQMEYCE--    | 792 |
| M3K6_HUMAN | 727 | GGSLSSLLRSVWGPL--KDNES-TISFYTRQILQGLYLHNDHIVHRDI    | 772 |
| GCN2_YEAST | 793 | NRTLYDLIHSE-N-LNQQRD-EYWR-L-F--RQILEALSIIHSQGIHRDL  | 836 |
| M3K6_HUMAN | 773 | KGDNVLINTFS-GLLKISDFGTSK---R-LAGI---T---P-CTETFT-   | 808 |
| GCN2_YEAST | 837 | KPMNIFIDE-SRN-VKIGDFGLAKNVHRSL-DILKLDSONLPGSSDNLTS  | 883 |



|            |      |                                                    |      |
|------------|------|----------------------------------------------------|------|
| M3K6_HUMAN | 809  | --GTLQYMAPEIIDQGRG-YG-KAADIWSLGTVI--EMATGRPPFHEL   | 852  |
| GCN2_YEAST | 884  | AIGTAMVVAEVLG-G-TGHYNEK-IDMYSLG--IIFEMIIY--PF-ST   | 924  |
| M3K6_HUMAN | 853  | GSPQAAMFQVGMKY----V---HPP-M-PSSLSAEQAFLLR-TFEPDPR  | 892  |
| GCN2_YEAST | 925  | G-----MERNVILKKLRVSVIEFPDFDDNMKVEKK--IIRLLIDHPN    | 967  |
| M3K6_HUMAN | 893  | LRASAQTL--G--DPFL--QPG--K---RSRS-PSSP-----RHA--PR  | 923  |
| GCN2_YEAST | 968  | KRPGARTLLNSGWL-P-VKHQDEVIKALKSLNPSPPWQQQVRESLFNQ   | 1015 |
| M3K6_HUMAN | 924  | P-S-----D--APSASPTSANSTTQSQ-T-----FPCQPASQH--      | 954  |
| GCN2_YEAST | 1016 | SYSLTNDILFDNSVPT-S-TPFAN-ILRSQMTTEEVVKIF--R---KHGG | 1056 |
| M3K6_HUMAN | 955  | -----PPS--P--P-----KRCLSY-----GGT-SQLR--V--P-----E | 975  |
| GCN2_YEAST | 1057 | IENNAPRIFPKAPIYGTQN-V-YEVLKGGTVLQYDLTYPMARYLSK     | 1104 |
| M3K6_HUMAN | 976  | EPA--AEE-----PASPEES-SGLSLHQSRR--AML-AAVLEQ--      | 1010 |
| GCN2_YEAST | 1105 | NPLSLKQYRMQHVYRP--PDHSRS--SL---E-PRKFGIDFDIISKSS   | 1146 |
| M3K6_HUMAN | 1011 | -ELPAL--AENLH--QE-----QKQEQGARLGRNHVEELLRCLGAHI    | 1047 |
| GCN2_YEAST | 1147 | SE--SGFYDAESLKIIDEILTVFPVFETNTFFIL--NHA-DILESV-FNF | 1191 |
| M3K6_HUMAN | 1048 | HTPN-RRQLAQE-L--RAL-Q-G-R-----LRAQ-GL-GPAL--LH     | 1077 |
| GCN2_YEAST | 1192 | -T-NIDK--AQRPLVSRMLSQVGFARSFKVKNELKAQLNISSTALNDLE  | 1237 |
| M3K6_HUMAN | 1078 | RPLFAFP-D--AVKQILKRQI-RPHWM-FVLDL--LSRAVRAALGVLG   | 1120 |
| GCN2_YEAST | 1238 | --LDFRDLDFEAAKRRLYKLMIDSPH-LKKIEDSLSHISK-V---LSYLK | 1280 |
| M3K6_HUMAN | 1121 | P-EVEKEAV-SPRSEELSN-----EG-----D--SQQ---SPGQQ      | 1148 |
| GCN2_YEAST | 1281 | PLEVARNVVISP---LSNYNSAFYKGGIMFHAVYDDGSSRNMAAAGGRY  | 1326 |
| M3K6_HUMAN | 1149 | SPLPV---EPEQG-----PAPLMVQLSLRA-ETDRLREILAGKERE     | 1186 |
| GCN2_YEAST | 1327 | DTL-ISFFARP-SGKSSNTRKA---VGFNL--AWET-----IF-GIAQN  | 1363 |
| M3K6_HUMAN | 1187 | Y-QALV--QRAL-QRLNEEARTYVLAPEPPTAL---S-TDQGLV-QWLQ  | 1226 |
| GCN2_YEAST | 1364 | YFK-LASGNR-IKKR-N---R-F-L-KD--TAVDWKPSRCDV-LISSFSN | 1401 |
| M3K6_HUMAN | 1227 | ELNVDG-G-TIQMLLNHSFTL--HTLLTYA--TR-----DDLITYTRIG- | 1264 |
| GCN2_YEAST | 1402 | SL-LDTIGVTI--LN---TLWKQNI--KADMLRDCSSVDDVV-T---GA  | 1438 |
| M3K6_HUMAN | 1265 | ---GMVCRI-WRAIL--AQRAGSTPVTS                       | 1286 |
| GCN2_YEAST | 1439 | QQDG---IDW--ILLIKQQA--YPLTN                        | 1458 |

Name 1: SGPP1\_HUMAN  
Name 2: DS1P1\_YEAST

Sphingosine-1-phosphate phosphatase 1 OS=Homo sapiens GN=SGPP1 PE=1 SV=2  
Dihydrosphingosine 1-phosphate phosphatase LCB3 OS=Saccharomyces cerevisiae (strain ATCC 204508 / S288c) GN=LCB3 PE=1 SV=1

Needed for following interaction(s):  
yeast genetic RASK\_HUMAN SGPP1\_HUMAN KRAS SGPP1 IRA2\_YEAST  
DS1P1\_YEAST

Length sequence 1: 441  
Length sequence 2: 409  
Sequence #1: SGPP1\_HUMAN  
Sequence #2: DS1P1\_YEAST  
Length #1: 517

|                              |                                                        |     |
|------------------------------|--------------------------------------------------------|-----|
| Length #2: 517               |                                                        |     |
| Matrix: BLOSUM62             |                                                        |     |
| Gap open: 2.0                |                                                        |     |
| Gap extend: 1.0              |                                                        |     |
| Length: 517                  |                                                        |     |
| Identity: 149/517 (28.82%)   |                                                        |     |
| Similarity: 220/517 (42.55%) |                                                        |     |
| Gaps: 193/517 (37.33%)       |                                                        |     |
| Score: 558.00                |                                                        |     |
| SGPP1_HUMAN                  | 10 LV-GRLQDPQKVARFQRLCGVEAPRRSADRRED-EKAEAP--LAGDPRL   | 55  |
| DS1P1_YEAST                  | 1 MVDG-L-NTSNI-R-KR-----A--RTLSNPDNFQ--E-PNYLL-DP--    | 32  |
| SGPP1_HUMAN                  | 56 RGRQPGAPGGPPGSD--RNQCPAK---PDGGGAPNGVRNGLAAELGPA    | 100 |
| DS1P1_YEAST                  | 33 -GNHP-----SDHFRTRM-SKFRF-----N-IREKL--L---          | 56  |
| SGPP1_HUMAN                  | 101 SPRRAGALRRN-SLT-GE-EGQLARVS--NWPLYCLFCFGTEL-GNELFY | 144 |
| DS1P1_YEAST                  | 57 -----VFTNNQSFTLRSWQKKY-R-SAFN-DLY--FTY-TSLMGSHFTY   | 94  |
| SGPP1_HUMAN                  | 145 IL-F-FPFWI-WNLDPLVGRRLVVIWLV---VMYL-GQCTKDIIRW--PR | 185 |
| DS1P1_YEAST                  | 95 VLCLPMPVWFGY-FE--TTKDMV--YILGYSI-YLSG-FFKDY--WCLPR  | 135 |
| SGPP1_HUMAN                  | 186 PASPPV--VKL-EVFYNS-EYSMPSTH-AMSGTAIPISMVLLTYGRW--Q | 228 |
| DS1P1_YEAST                  | 136 PRAPPLHRTLSE--YTTKEYGAPSSHTA-NATG--VSLFL-YNIWRMQ   | 179 |
| SGPP1_HUMAN                  | 229 YP--LIYGLILIPC-----WCSLVCLSRIMGMHSILDIIAGFLYITL--  | 269 |
| DS1P1_YEAST                  | 180 ESSVMVQ-L-LLSCVVLFYMTLV-FGRIYCGMHGILDVSGGLIGIVCF   | 226 |
| SGPP1_HUMAN                  | 270 ILAV-F-YPFVDL-IDNFNQTHKYAP-FII-IGLHLALGIFSFT--LDTW | 312 |
| DS1P1_YEAST                  | 227 IVRMYFKYRFPGLRIE---E-HWWFPLFSVGWGL-L-L-LFKHVKPVDEC | 269 |
| SGPP1_HUMAN                  | 313 STSRGDT-AEILG--SGAGI-AC---GS--HVT--YNMGLVLDPSLDTLP | 351 |
| DS1P1_YEAST                  | 270 PCFQ-DSVA-FMGVVS--GIECCDWLKGKVFVTLVYN---LEPN-----  | 306 |
| SGPP1_HUMAN                  | 352 LAGPPITVTLFGKAILRILIGMVFLII-RDVMKK--I-TIPLACKIFNI  | 397 |
| DS1P1_YEAST                  | 307 -CG--WRRTL--A--RLLVGLPCV-VIWKYVISKPMIYTL-L-IKVFHL  | 345 |
| SGPP1_HUMAN                  | 398 PCDD--I--RKAR-Q--HME---VELP-Y-----RYITY-GMVG       | 424 |
| DS1P1_YEAST                  | 346 K-DDRNVAARK-RLEATHKEGASKYECPLYIGEPKIDILGRFIIYAG-VP | 392 |
| SGPP1_HUMAN                  | 425 FSITFFVPYIFFFIGIS                                  | 441 |
| DS1P1_YEAST                  | 393 FTVVMCSEVFLSLNIA                                   | 409 |

Name 1: IF4A1\_HUMAN  
Name 2: IF4A\_DROME

Eukaryotic initiation factor 4A-I OS=Homo sapiens GN=EIF4A1 PE=1 SV=1  
Eukaryotic initiation factor 4A OS=Drosophila melanogaster GN=eIF-4a PE=2 SV=3

Needed for following interaction(s):  
fly genetic IF4A1\_HUMAN PTEN\_HUMAN EIF4A1 PTEN IF4A\_DROME  
Q7KM06\_DROME

Length sequence 1: 406  
Length sequence 2: 403  
Sequence #1: IF4A1\_HUMAN  
Sequence #2: IF4A\_DROME  
Length #1: 409  
Length #2: 409  
Matrix: BLOSUM62  
Gap open: 2.0  
Gap extend: 1.0

Length: 409  
 Identity: 299/409 (73.11%)  
 Similarity: 357/409 (87.29%)  
 Gaps: 15/409 (3.67%)  
 Score: 1580.00

|             |     |                                                      |     |
|-------------|-----|------------------------------------------------------|-----|
| IF4A1_HUMAN | 6   | DSRS---RDNGPDGMEPEGVIESNWNEIVDSFDDMNLSESLLRGIYAYGF   | 52  |
| IF4A_DROME  | 2   | DDRNEIPQD-GPASMEPEGVIESTWHEVYDNFDDMNLREELLRGIYGYGF   | 50  |
| IF4A1_HUMAN | 53  | EKPSAIQQRALPCIKGYDVIAQAQSGTGKTATFAISILQQIELDLKATQ    | 102 |
| IF4A_DROME  | 51  | EKPSAIQQRALPCVGRDVIQAQSGTGKTATFSAIILQQIDTSIRECQ      | 100 |
| IF4A1_HUMAN | 103 | ALVLAPTRELAQQIQKVVVMALGDYMGASCHACIGGTNVRAEVQKLQMEA   | 151 |
| IF4A_DROME  | 101 | ALILAPTRERLATQIQRVVMALGEYMKVHS-HACIGGTNVN-EDARI-LES  | 147 |
| IF4A1_HUMAN | 152 | P-HIIVGTGPRVFDMLNRRYLSPKYIKMFLDEADEMLSRGFKDQIYDIF    | 200 |
| IF4A_DROME  | 148 | GCHVVVGTGPRVYDMINRKLRLTQYIKLFLVLEADEMLSRGFKDQIQDVF   | 197 |
| IF4A1_HUMAN | 201 | QK-LNSNTQVLLSATMPSDVLEVTKKFMRRPILILVKKKEELTLEGIRQF   | 249 |
| IF4A_DROME  | 198 | -KMLPPDVQVILLSATMPPDVLEVSRCFMRDPVSVILVKKKEELTLEGIKQF | 246 |
| IF4A1_HUMAN | 250 | YINVEREEWKLDTLCDLYEITLITQAVIFINTRRKVDWLTEKM--HARDF   | 297 |
| IF4A_DROME  | 247 | YVNVKQENWKLGTLCDLYDLSITQSVIFCNTRRKVDQLTQEMSIH--NF    | 294 |
| IF4A1_HUMAN | 298 | TVSAMHGMDQKERDVMREFRSGSSRVLITDILLARGIDVQQVSLVIN      | 347 |
| IF4A_DROME  | 295 | TVSAMHGDMEQRDREVIMKQFRSGSSRVLITDILLARGIDVQQVSLVIN    | 344 |
| IF4A1_HUMAN | 348 | DLPTNRENYIHRIGRGRFRGKGVAINMVTEEDKRTLRLDIETFYNTSIEE   | 397 |
| IF4A_DROME  | 345 | DLPSNRENYIHRIGRGRFRGKGVAINFITDDRRILKLDIEQFYHTTIEE    | 394 |
| IF4A1_HUMAN | 398 | MPLNVADLI 406                                        |     |
| IF4A_DROME  | 395 | MPANIADLI 403                                        |     |

Name 1: TERA\_HUMAN  
 Name 2: CDC48\_YEAST

Transitional endoplasmic reticulum ATPase OS=Homo sapiens GN=VCP PE=1 SV=4  
 Cell division control protein 48 OS=Saccharomyces cerevisiae (strain ATCC 204508 / S288c) GN=CDC48 PE=1 SV=3

Needed for following interaction(s):

|            |         |            |           |     |     |             |
|------------|---------|------------|-----------|-----|-----|-------------|
| yeast      | genetic | TERA_HUMAN | BLM_HUMAN | VCP | BLM | CDC48_YEAST |
| SGS1_YEAST |         |            |           |     |     |             |

Length sequence 1: 806  
 Length sequence 2: 835  
 Sequence #1: TERA\_HUMAN  
 Sequence #2: CDC48\_YEAST  
 Length #1: 834  
 Length #2: 834  
 Matrix: BLOSUM62  
 Gap open: 2.0  
 Gap extend: 1.0  
 Length: 834  
 Identity: 577/834 (69.18%)  
 Similarity: 699/834 (83.81%)  
 Gaps: 40/834 (4.80%)  
 Score: 3058.00

|             |    |                                                    |    |
|-------------|----|----------------------------------------------------|----|
| TERA_HUMAN  | 2  | ASGADSKGDD-LSTAILKQKNRPNRLIVDEAINEEDNSVVSLSQPKMDEL | 49 |
| CDC48_YEAST | 11 | ASGVDPREEDKTATAILRRKKKDNMLLVDDAINDNSVIAINSN-TMDKL  | 59 |
| TERA_HUMAN  | 50 | QLFRGDTVLLKGGKRRREAVCIVLSDDTCSDEKIRMNRVVRNLRVRLGDV | 99 |

|             |     |                                                       |     |
|-------------|-----|-------------------------------------------------------|-----|
| CDC48_YEAST | 60  | ELFRGDTVLVKGGKRRKDTVLIVLIDDELEDGACRINRVVRNLRIRLGLD    | 109 |
| TERA_HUMAN  | 100 | ISIQPCPDVKYKGRHIVLPIDDTVEGITGNLFVEVLYKPYFLEAYRPIRKG   | 149 |
| CDC48_YEAST | 110 | VTIHPCPDIKYATRISVLP IADTIEGITGNLFDVFLKPYFVEAYRPRVKG   | 159 |
| TERA_HUMAN  | 150 | DIFLVRGGMRAVEFKVVTDPSPYCI VAPD TVIHCEGEP I KREDEEESLN | 199 |
| CDC48_YEAST | 160 | DHFVVRGGMRQVEFKVVDVEPEEYAVVAQDTIIHWBEGEPINREDEENNMN   | 209 |
| TERA_HUMAN  | 200 | EVGYDDIGGCRKQLAQIKEMVELPLRHPALFKAIGVKPPRGILLYGPPGT    | 249 |
| CDC48_YEAST | 210 | EVGYDDIGGCRKQMAQIREMVELPLRHPQLFKAIGIKPPRGVLMYGPPT     | 259 |
| TERA_HUMAN  | 250 | GKTLIARAVANETGAFFFLINGPEIMSKLAGESESNLRKAFEEAEKNAPA    | 299 |
| CDC48_YEAST | 260 | GKTLMARAVANETGAFFFLINGPEVMKMGAGESESNLRKAFEEAEKNAPA    | 309 |
| TERA_HUMAN  | 300 | IIFIDEIDAIAPKREKTHGEVRRIVSOLLTMDGLKQRAHVIVMAATNR      | 349 |
| CDC48_YEAST | 310 | IIFIDEIDSIAPKRDKTNGEVERRVVSQLTMDGMKARSNVVVIAATNR      | 359 |
| TERA_HUMAN  | 350 | PNSIDPALRRFRGRFDREVDIGIPDATGRLEILQIHTKNMKLADDVDLEQV   | 399 |
| CDC48_YEAST | 360 | PNSIDPALRRFRGRFDREVDIGIPDATGRLEVLRIHTKNMKLADDVDLEAL   | 409 |
| TERA_HUMAN  | 400 | ANETHGHVGDALALCSEALQAIRKKMDLIDL-EDETIDAEMVNSLAVT      | 448 |
| CDC48_YEAST | 410 | AAETHGYVGADIASLCEAAMQIREKMDLIDLDEDE-IDAEVLDSLGV       | 458 |
| TERA_HUMAN  | 449 | MDDFRWALSQSNPSALRETVE-VPQVTWEDIGGLEDVKRELQELVQYVP     | 497 |
| CDC48_YEAST | 459 | MDNFRFALGNSNPSALRETVVESV-NVTWDDVGLDEIKBELKETVEYVP     | 507 |
| TERA_HUMAN  | 498 | EHPDKFLKFGMTPSKGVLFYGPPEGKTL LAKAIANECQANFISIKGP      | 547 |
| CDC48_YEAST | 508 | LHPDQYTKFGLSPSKGVLFYGPPTGKTL LAKAVATEV SANFISVKGPEL   | 557 |
| TERA_HUMAN  | 548 | LTMWFGSEANVREIFDKARQAAPCVLFFDELDSIAKARGGNIGDGGGAA     | 597 |
| CDC48_YEAST | 558 | LSMWYGESESNIRIDIFDKARAAAPT VVFLDELDSIAKARGGSLGDAGGAS  | 607 |
| TERA_HUMAN  | 598 | DRVINQILTEMDGMSTKKNVFIIGATNRPDIIDPAILRPGRLDQLIYIPL    | 647 |
| CDC48_YEAST | 608 | DRVVNQLLTEM DGMNAKKNVFIIGATNRPDIIDPAILRPGRLDQLIYVPL   | 657 |
| TERA_HUMAN  | 648 | PDEKSRVAILKANLRKSPVAKVDLEF--LAKMTNGFSGADLTEICQRAC     | 695 |
| CDC48_YEAST | 658 | PDENARLSILNAQLRKTPL--EPGLELTAIAKATQGFSGADLLYIVQRAA    | 705 |
| TERA_HUMAN  | 696 | KLAIRESIESEIRR---ERE-R-----Q-TNPSA-MEVE-EDDPVPEIR     | 732 |
| CDC48_YEAST | 706 | KYAIKDSIEAH-RQHEAEKEVKVEGEDVEMTDEGAKAEQEPVDPVPIYIT    | 754 |
| TERA_HUMAN  | 733 | RDHFEEAMRFARRSVSDNDIRKYEMFAQTLLQQSRG-FGSFRF---PSG--   | 776 |
| CDC48_YEAST | 755 | KEHFAEAMKTAKRVSDAELRRYEAYSQMQKASRGQFSNFNFNDAPLGT      | 804 |
| TERA_HUMAN  | 777 | ----NQGGAGPSQSGGGTGGSVYTEDNDDLY 805                   |     |
| CDC48_YEAST | 805 | ATDNANSNNSAPS-GAGAAF-GS-NAEE-DDDLY 834                |     |

Name 1: CDK2\_HUMAN  
 Name 2: CDK1\_YEAST

Cyclin-dependent kinase 2 OS=Homo sapiens GN=CDK2 PE=1 SV=2  
 Cyclin-dependent kinase 1 OS=Saccharomyces cerevisiae (strain ATCC 204508 / S288 c) GN=CDC28 PE=1 SV=1

Needed for following interaction(s):

|       |            |            |             |      |       |          |
|-------|------------|------------|-------------|------|-------|----------|
| yeast | physical   | CDK2_HUMAN | PTTG1_HUMAN | CDK2 | PTTG1 | CDK1_YEA |
| ST    | SECU_YEAST |            |             |      |       |          |

| yeast                                                                                                            | genetic | CDK2_HUMAN                                              | PTTG1_HUMAN | CDK2  | PTTG1 | CDK1_YEAST |
|------------------------------------------------------------------------------------------------------------------|---------|---------------------------------------------------------|-------------|-------|-------|------------|
| SECU_YEAST                                                                                                       |         |                                                         |             |       |       |            |
| Length sequence 1:                                                                                               |         | 298                                                     |             |       |       |            |
| Length sequence 2:                                                                                               |         | 298                                                     |             |       |       |            |
| Sequence #1:                                                                                                     |         | CDK2_HUMAN                                              |             |       |       |            |
| Sequence #2:                                                                                                     |         | CDK1_YEAST                                              |             |       |       |            |
| Length #1:                                                                                                       |         | 306                                                     |             |       |       |            |
| Length #2:                                                                                                       |         | 306                                                     |             |       |       |            |
| Matrix:                                                                                                          |         | BLOSUM62                                                |             |       |       |            |
| Gap open:                                                                                                        |         | 2.0                                                     |             |       |       |            |
| Gap extend:                                                                                                      |         | 1.0                                                     |             |       |       |            |
| Length:                                                                                                          |         | 306                                                     |             |       |       |            |
| Identity:                                                                                                        |         | 192/306 (62.75%)                                        |             |       |       |            |
| Similarity:                                                                                                      |         | 241/306 (78.76%)                                        |             |       |       |            |
| Gaps:                                                                                                            |         | 27/306 (8.82%)                                          |             |       |       |            |
| Score:                                                                                                           |         | 1050.00                                                 |             |       |       |            |
| CDK2_HUMAN                                                                                                       |         | 1 M--E--NFQKVEKIGEGTYGVVYKA---R-NKLTGE-VVALKKIRLDTET    |             |       |       | 41         |
| CDK1_YEAST                                                                                                       |         | 1 MSGELANYKRLEKVGEGTYGVVYKALDLRPGQ--GQRVVALKKIRLESED    |             |       |       | 48         |
| CDK2_HUMAN                                                                                                       |         | 42 EGVNSTAIREISLLKELNHPNIVKLLDVIHTE-NKLYLVFEFLHQDLKKF   |             |       |       | 90         |
| CDK1_YEAST                                                                                                       |         | 49 EGVNSTAIREISLLKELKDDNIVRLYDIVHSDAHKLYLVFEFLDLDLKRY   |             |       |       | 98         |
| CDK2_HUMAN                                                                                                       |         | 91 MDASALTGIP--LPL----IKSYLFQLLOGLAFCHSHRVLHRLDKPONLL   |             |       |       | 134        |
| CDK1_YEAST                                                                                                       |         | 99 ME-----GIPKDQPLGADIVKKFMMQLCKGAIYCHSHRILHRLDKPONLL   |             |       |       | 143        |
| CDK2_HUMAN                                                                                                       |         | 135 INTEGAIKLADFGGLARAFVVPVRYTYHEVVTLWYRAPEILLGCKYYSTAV |             |       |       | 184        |
| CDK1_YEAST                                                                                                       |         | 144 INKDGNLKLGDFGLARAFVPLRAYTHEIVTLWYRAPEVLLGKQYSTGV    |             |       |       | 193        |
| CDK2_HUMAN                                                                                                       |         | 185 DIWSLGCIFAEMVTRRALFPGDSEIDQLFRIFRTLGTDPDEVVWPGVTSMP |             |       |       | 234        |
| CDK1_YEAST                                                                                                       |         | 194 DTWSIGCIFAEMCNRKPIFSGDSEIDQIFKIFRVLGTPNEAIWPDIVLPL  |             |       |       | 243        |
| CDK2_HUMAN                                                                                                       |         | 235 DYKPSFPKWARQDFSKVVPPLDEDRSLLSQMLHYDP-NKRISA-KAALA   |             |       |       | 282        |
| CDK1_YEAST                                                                                                       |         | 244 DFKPSFPQWRRKDLVQVPSLDPRGIDLLDKLLAYDPIN-RISARRAI-    |             |       |       | 291        |
| CDK2_HUMAN                                                                                                       |         | 283 HPFFQD 288                                          |             |       |       |            |
| CDK1_YEAST                                                                                                       |         | 292 HPYFQE 297                                          |             |       |       |            |
| -----                                                                                                            |         |                                                         |             |       |       |            |
| Name 1:                                                                                                          |         | FOXF1_HUMAN                                             |             |       |       |            |
| Name 2:                                                                                                          |         | HCMI1_YEAST                                             |             |       |       |            |
| Forkhead box protein F1 OS=Homo sapiens GN=FOXF1 PE=2 SV=2                                                       |         |                                                         |             |       |       |            |
| Forkhead transcription factor HCMI1 OS=Saccharomyces cerevisiae (strain ATCC 2045 08 / S288c) GN=HCMI1 PE=1 SV=3 |         |                                                         |             |       |       |            |
| Needed for following interaction(s):                                                                             |         |                                                         |             |       |       |            |
| yeast                                                                                                            | genetic | PTTG1_HUMAN                                             | FOXF1_HUMAN | PTTG1 | FOXF1 | SECU_YEAST |
| HCMI1_YEAST                                                                                                      |         |                                                         |             |       |       |            |
| Length sequence 1:                                                                                               |         | 379                                                     |             |       |       |            |
| Length sequence 2:                                                                                               |         | 564                                                     |             |       |       |            |
| Sequence #1:                                                                                                     |         | FOXF1_HUMAN                                             |             |       |       |            |
| Sequence #2:                                                                                                     |         | HCMI1_YEAST                                             |             |       |       |            |
| Length #1:                                                                                                       |         | 576                                                     |             |       |       |            |
| Length #2:                                                                                                       |         | 576                                                     |             |       |       |            |
| Matrix:                                                                                                          |         | BLOSUM62                                                |             |       |       |            |
| Gap open:                                                                                                        |         | 2.0                                                     |             |       |       |            |
| Gap extend:                                                                                                      |         | 1.0                                                     |             |       |       |            |
| Length:                                                                                                          |         | 576                                                     |             |       |       |            |
| Identity:                                                                                                        |         | 168/576 (29.17%)                                        |             |       |       |            |
| Similarity:                                                                                                      |         | 217/576 (37.67%)                                        |             |       |       |            |
| Gaps:                                                                                                            |         | 269/576 (46.70%)                                        |             |       |       |            |
| Score:                                                                                                           |         | 560.00                                                  |             |       |       |            |
| FOXF1_HUMAN                                                                                                      |         | 1 MSSAPEKQQPPHGGGGGGGGGAAMDP-ASS--GPSKAKK----T----      |             |       |       | 39         |

|                                                                                              |         |                                                     |             |       |       |            |
|----------------------------------------------------------------------------------------------|---------|-----------------------------------------------------|-------------|-------|-------|------------|
| HCMI1_YEAST                                                                                  | 49      | MKEV-NK-RPSH-----PLSPDHSSPIAPSKAKRQRSDTCARS         | 84          |       |       |            |
| FOXF1_HUMAN                                                                                  | 40      | NAG-----I-----RR--PE---KPPYSYIA-LIVMAI-QSSPTKRLT    | 70          |       |       |            |
| HCMI1_YEAST                                                                                  | 85      | N-GNLTLEEILQSLERRRINGELAKKPPYSY-ATLICLAIQSQEGK-LT   | 131         |       |       |            |
| FOXF1_HUMAN                                                                                  | 71      | LSEIYQFLQSRFPFFFRGSYQ---GWKNSVRHNLSLNECFIKLKPGLGRPG | 117         |       |       |            |
| HCMI1_YEAST                                                                                  | 132     | LSQIYHWIHVHFPYK---QKDaswQNSIRHNLSLNDAFIKTEKSC--DG   | 176         |       |       |            |
| FOXF1_HUMAN                                                                                  | 118     | KGHYWTIDPASE--FMFEEGSFRRRPRG--F-RRKQAL-KPMY----S-   | 156         |       |       |            |
| HCMI1_YEAST                                                                                  | 177     | KGHFWEVRPGAETKF-F-KG---EN-RGYEFVKDSLQDIGK--YFEIDST  | 218         |       |       |            |
| FOXF1_HUMAN                                                                                  | 157     | M--M---NGLGFN-HLPD-----TYG-F-----Q-GSAGGL--S-----C  | 181         |       |       |            |
| HCMI1_YEAST                                                                                  | 219     | LDELEQVESGEG-NDLDPDEEREBAEGKFPSEIEIQLNSSPILRVSQLHHI | 267         |       |       |            |
| FOXF1_HUMAN                                                                                  | 182     | P---PNSLAL---EGGL-GM--M--NGHLPGNVDMAL-PSHSV--P-H    | 215         |       |       |            |
| HCMI1_YEAST                                                                                  | 268     | PQLKTDNSV-LNPHE-NLESMRNMIEN-DV-NNID--SLEPPY-VMKKYH  | 310         |       |       |            |
| FOXF1_HUMAN                                                                                  | 216     | ----LPS--NG-GHSYMGCC--GG-AAAGEYPHDSVSP---A-SP----   | 247         |       |       |            |
| HCMI1_YEAST                                                                                  | 311     | TSLGLPLSVNAKDHFQAGVKNNNITQANRF----NTLPITSAKSPQNF    | 355         |       |       |            |
| FOXF1_HUMAN                                                                                  | 248     | -----LLP-----TGAGVMEPHAV-YSGSAAAWP----PSASA         | 276         |       |       |            |
| HCMI1_YEAST                                                                                  | 356     | KYFTSFNSNFEDLSPLRSNVGAGSLDLP--LPYS-----PLKLYDQKNL   | 397         |       |       |            |
| FOXF1_HUMAN                                                                                  | 277     | AL----NSGASYIKQQ-PLSPCNPAANPLS-GS--LST----HS--LEQ-  | 311         |       |       |            |
| HCMI1_YEAST                                                                                  | 398     | ALMSKPPSQSQYSNSQLP--P--P---PSSHGSDLLKTPKMRHSDGLEKT  | 440         |       |       |            |
| FOXF1_HUMAN                                                                                  | 312     | -----P-----YLH--QN-SH--N--APAEL-QGI--P-RY-----      | 331         |       |       |            |
| HCMI1_YEAST                                                                                  | 441     | PSRLISTPKDGNSILRKWQTPSHLFEDLYCSP--LFRAIETPIRYITTPG  | 488         |       |       |            |
| FOXF1_HUMAN                                                                                  | 332     | ---HSQ--SPSMCDRK---EFVF-S-FNA-MASSSM-----HS----A--  | 359         |       |       |            |
| HCMI1_YEAST                                                                                  | 489     | GTLETQISP---RKSSAPD-VLTSATNSKFASSGLFGVDVYVWKRATE    | 533         |       |       |            |
| FOXF1_HUMAN                                                                                  | 360     | ---GGG---S---Y-YHQOVTYQD 373                        |             |       |       |            |
| HCMI1_YEAST                                                                                  | 534     | KISDGNNTTDSNQKHHPHYHNHPS-ND 558                     |             |       |       |            |
| -----                                                                                        |         |                                                     |             |       |       |            |
| Name 1:                                                                                      |         | CLIP4_HUMAN                                         |             |       |       |            |
| Name 2:                                                                                      |         | NIP80_YEAST                                         |             |       |       |            |
| CAP-Gly domain-containing linker protein 4 OS=Homo sapiens GN=CLIP4 PE=1 SV=1                |         |                                                     |             |       |       |            |
| Protein NIP100 OS=Saccharomyces cerevisiae (strain ATCC 204508 / S288c) GN=NIP10 0 PE=1 SV=2 |         |                                                     |             |       |       |            |
| Needed for following interaction(s):                                                         |         |                                                     |             |       |       |            |
| yeast                                                                                        | genetic | PTTG1_HUMAN                                         | CLIP4_HUMAN | PTTG1 | CLIP4 | SECU_YEAST |
| NIP80_YEAST                                                                                  |         |                                                     |             |       |       |            |
| Length sequence 1:                                                                           |         | 705                                                 |             |       |       |            |
| Length sequence 2:                                                                           |         | 868                                                 |             |       |       |            |
| Sequence #1:                                                                                 |         | CLIP4_HUMAN                                         |             |       |       |            |
| Sequence #2:                                                                                 |         | NIP80_YEAST                                         |             |       |       |            |
| Length #1:                                                                                   |         | 957                                                 |             |       |       |            |
| Length #2:                                                                                   |         | 957                                                 |             |       |       |            |
| Matrix:                                                                                      |         | BLOSUM62                                            |             |       |       |            |
| Gap open:                                                                                    |         | 2.0                                                 |             |       |       |            |
| Gap extend:                                                                                  |         | 1.0                                                 |             |       |       |            |
| Length:                                                                                      |         | 957                                                 |             |       |       |            |
| Identity:                                                                                    |         | 250/957 (26.12%)                                    |             |       |       |            |
| Similarity:                                                                                  |         | 356/957 (37.20%)                                    |             |       |       |            |
| Gaps:                                                                                        |         | 403/957 (42.11%)                                    |             |       |       |            |
| Score:                                                                                       |         | 663.00                                              |             |       |       |            |

|             |     |                                                       |     |
|-------------|-----|-------------------------------------------------------|-----|
| CLIP4_HUMAN | 3   | IEDLPDFPL---EG--NPL--F-----GYPF-IFSASDTPVI-F          | 33  |
| NIP80_YEAST | 46  | IE-L-DKPLGKNDGSANGIRYFDIDLKKNANGGY-YGLFCKKDT--LQF     | 90  |
| CLIP4_HUMAN | 34  | SISAAMPSCDFEFSFFDPNDA-----SCQEI---L---FD--P-K         | 64  |
| NIP80_YEAST | 91  | -YK---PDDDEHSLNNGNAAQETIKNLQVKCESLASKLNKIKIENHELK     | 135 |
| CLIP4_HUMAN | 65  | TSV---S--E--LFA-ILR--QWVQVQ-QNIDIIGNEILKRGK-NVN--     | 100 |
| NIP80_YEAST | 136 | TSVEKLSSTNETVLLSKISRDLKLVKELKVEN---GN--MKTHLDNFNHL    | 179 |
| CLIP4_HUMAN | 101 | -D-RDG-LT-DM---TLLHYTCKSGAH---GIGDVT-----AVK----      | 130 |
| NIP80_YEAST | 180 | LDASDSVMAPDLDKGTLL---RS--HLLQGLLD-QTKLSYDKAMKVQED     | 223 |
| CLIP4_HUMAN | 131 | -FA--TQLID----LG---ADISLRSRWTNMALHYAAFYDVPPEL-IRVI    | 169 |
| NIP80_YEAST | 224 | LLEENTQLLEENAVLSKKSISDLGLQLQQTN-NTI---G--DL-ALQIEA-   | 265 |
| CLIP4_HUMAN | 170 | LKTSKPKD-VD-ATCSDFN--FGTALHIAAYN-----LCAGAVK---L-     | 206 |
| NIP80_YEAST | 266 | -Q-SKSSNIVDKLT-ND-NILL-TS-NIKALNNELEELQA-KEKLDENLR    | 308 |
| CLIP4_HUMAN | 207 | -----LEQG----AN--PAFRNDKQIPADV-VPD--PVDMPLEMAA        | 241 |
| NIP80_YEAST | 309 | ITYEQLEQELRLQLSNLQSALENEK-EI-AGTYIEENSRLKATLESIE-A    | 355 |
| CLIP4_HUMAN | 242 | ATA-K----EIK----Q--M----LL-----D--AVP----LS-----      | 258 |
| NIP80_YEAST | 356 | KTSHKFSQLELKVNTLQEELYQNKLLKFFQIYEPFAQPHLAALSSQLQY     | 405 |
| CLIP4_HUMAN | 259 | -CN-I-SK--AMLPNYD-HVTGKAMTSLGLKLGDRV-VIAGQKVG---      | 298 |
| NIP80_YEAST | 406 | LAEVIESENFQKLENIIEIHIILK-VLSSISYAL--HIYTI---K-NTPDH   | 448 |
| CLIP4_HUMAN | 299 | LRF CGTT-E-F-----A--SGQWAGIE-LDEPEGKNNNGSVGKVQ--YFK-C | 336 |
| NIP80_YEAST | 449 | LE---TTLQCFKVNIAPI-S-MWLS-EFL---QRKFS-S--K-QETAFSIC   | 486 |
| CLIP4_HUMAN | 337 | APKYGI----FAPLSK-ISKAKGRRKNITHTP--STKAAVPLIRSQKIDV    | 379 |
| NIP80_YEAST | 487 | --QF-LEDNKF--LDKDVTLI---LK-ILH-PILET--TVP-----KL-L    | 518 |
| CLIP4_HUMAN | 380 | AHV-T-SKVN---TGL-MTSKSDSASESTLSL---PP--G-EELKTVTE     | 416 |
| NIP80_YEAST | 519 | AFLRTNSNFNDNT-LCLIG---SLYERSLSLIARIDKLGIGKEE---ISK    | 561 |
| CLIP4_HUMAN | 417 | KDVAL-LGSVSSC---SS--T---S-SLEH-RQSYP-----KK-----Q     | 444 |
| NIP80_YEAST | 562 | QDNRLF--YPSCDITLSSILTILFSDAL-FLRQDYKRISLKKLEVVFFQ     | 608 |
| CLIP4_HUMAN | 445 | NAISS---NKKTM-SKSPS--LS---SRAS--AGLNSSATSTANNSSRC-E   | 482 |
| NIP80_YEAST | 609 | -GIESLLEN-ITIFPEQPSQOTSSESQCNIKEG-NFS-NSLLSD-RLNE     | 653 |
| CLIP4_HUMAN | 483 | GE-LRLGERVLVVGQR-----LGT-IR-FFG-----T--TNFAPGYWY      | 515 |
| NIP80_YEAST | 654 | -ENIRLKE-VLV--QKENMLTELETKIKIIIGRDLERKTLEENIKT---L    | 696 |
| CLIP4_HUMAN | 516 | GIELEKPHGKNDGSGVGVQYFS-CSPRYGIFAPPSPRVQRVTD-SLDTLSE   | 563 |
| NIP80_YEAST | 697 | KVEL---NNKNEENCCKTEILNKLKEE-N-F---NLVNRKLNEMEL-KLYQ   | 737 |
| CLIP4_HUMAN | 564 | ISSNKQ-NHSPYGF-RRSFSTTS-ASS--Q-KE-INRRNAFSSK-AALR     | 605 |
| NIP80_YEAST | 738 | IKDNNTLNKIY--LDREKVDNRVNLVSEIMELRETI--RRQ-IKEQKRVSID  | 783 |
| CLIP4_HUMAN | 606 | RSW-SSTPTAGGIEGS--VK--L-HEGSQVLL-TSSNEMGTVRVYGPTE     | 648 |
| NIP80_YEAST | 784 | FSWLDELPA--VENKQPFKEHINH--S---LDTLGIEM--FNFVS-T--     | 820 |
| CLIP4_HUMAN | 649 | ASGIWLGLEL-RS-AGK----KNDGS-VG--DKRYFTCK-PNHGVLVR-P    | 687 |

|                                                                                     |             |                                                     |       |       |             |
|-------------------------------------------------------------------------------------|-------------|-----------------------------------------------------|-------|-------|-------------|
| NIP80_YEAST                                                                         | 821         | -SRI-LDLKLDQPLAEDELWHERDHSYISYL-KR----KRKN----IRLK  | 859   |       |             |
| CLIP4_HUMAN                                                                         | 688         | SR--VTY                                             | 692   |       |             |
| NIP80_YEAST                                                                         | 860         | SQNVVVTY                                            | 866   |       |             |
| -----                                                                               |             |                                                     |       |       |             |
| Name 1: ESPL1_HUMAN                                                                 |             |                                                     |       |       |             |
| Name 2: ESPL1_YEAST                                                                 |             |                                                     |       |       |             |
| Separin OS=Homo sapiens GN=ESPL1 PE=1 SV=3                                          |             |                                                     |       |       |             |
| Separin OS=Saccharomyces cerevisiae (strain ATCC 204508 / S288c) GN=ESPL1 PE=1 SV=2 |             |                                                     |       |       |             |
| Needed for following interaction(s):                                                |             |                                                     |       |       |             |
| yeast genetic                                                                       | PTTG1_HUMAN | ESPL1_HUMAN                                         | PTTG1 | ESPL1 | SECU_YEAST  |
| ESPL1_YEAST                                                                         |             |                                                     |       |       |             |
| yeast physical                                                                      | ESPL1_HUMAN | PTTG1_HUMAN                                         | ESPL1 | PTTG1 | ESPL1_YEAST |
| ST                                                                                  | SECU_YEAST  |                                                     |       |       |             |
| Length sequence 1: 2120                                                             |             |                                                     |       |       |             |
| Length sequence 2: 1630                                                             |             |                                                     |       |       |             |
| Sequence #1: ESPL1_HUMAN                                                            |             |                                                     |       |       |             |
| Sequence #2: ESPL1_YEAST                                                            |             |                                                     |       |       |             |
| Length #1: 2381                                                                     |             |                                                     |       |       |             |
| Length #2: 2381                                                                     |             |                                                     |       |       |             |
| Matrix: BLOSUM62                                                                    |             |                                                     |       |       |             |
| Gap open: 2.0                                                                       |             |                                                     |       |       |             |
| Gap extend: 1.0                                                                     |             |                                                     |       |       |             |
| Length: 2381                                                                        |             |                                                     |       |       |             |
| Identity: 613/2381 (25.75%)                                                         |             |                                                     |       |       |             |
| Similarity: 962/2381 (40.40%)                                                       |             |                                                     |       |       |             |
| Gaps: 1033/2381 (43.39%)                                                            |             |                                                     |       |       |             |
| Score: 1895.00                                                                      |             |                                                     |       |       |             |
| ESPL1_HUMAN                                                                         | 17          | KEAEELLPALKEFLS-NPPAGFPSSRSDAERRQACDAILRACNQQLTAKL  | 65    |       |             |
| ESPL1_YEAST                                                                         | 4           | KQ-EE--P-LNE-ISPNTP--M-TSKS-----YLL---NDTL-SKV      | 32    |       |             |
| ESPL1_HUMAN                                                                         | 66          | ACPRHLGSLLELAELACDGYLVSTPQRPPPLYLERILFVLLRNAAQ--GS  | 113   |       |             |
| ESPL1_YEAST                                                                         | 33          | ---HH--S-----G---QT--RP---LTS---VLSGDASSNSIG-       | 55    |       |             |
| ESPL1_HUMAN                                                                         | 114         | PEATLRLAOPHLACLQV----CSR--EAAPQDYEA--ARGS-FSLL--    | 151   |       |             |
| ESPL1_YEAST                                                                         | 56          | ---I-LA--MHNNIIRDFTKIASNNIDLAIEDITVDHSLNSIYSLKLS    | 98    |       |             |
| ESPL1_HUMAN                                                                         | 152         | ---WKG-AEALLERRAAFAARL---KALSFLVLLLEDESTPCEVPH-FASP | 193   |       |             |
| ESPL1_YEAST                                                                         | 99          | HMMW-GHINSTVKQHLMIIVKLNINNALG-LA----SS--EIIFLF-NE   | 138   |       |             |
| ESPL1_HUMAN                                                                         | 194         | TACRAVAHQFLDASGHGL-N--EAD-A---D-FLDDL--LSRHVI--RA   | 231   |       |             |
| ESPL1_YEAST                                                                         | 139         | T-----NLFQA--HSLKNILLADFSTWNDYYLSNLKILALQIILKRRK    | 178   |       |             |
| ESPL1_HUMAN                                                                         | 232         | LVGERGSSGLLSPQRALCLELLEHCRRCFWSRHHDK--AISAVE---     | 276   |       |             |
| ESPL1_YEAST                                                                         | 179         | LVDE-----YL-PH-----ILEL-----F--S--HDKRYLLK--DPNL    | 204   |       |             |
| ESPL1_HUMAN                                                                         | 277         | KAHSYLRNTN--LA--PSLQL-CQ-L-GVKLLQ-VGE-EGP--QAVAKLL  | 315   |       |             |
| ESPL1_YEAST                                                                         | 205         | KAHA-L--TKIVLSFF-SVTTSCKVFLGLKFLQYIKQFKLPFKKFISNIT  | 250   |       |             |
| ESPL1_HUMAN                                                                         | 316         | IKA-SA-VLSKS-ME-APSPPLRALY-ESCQFFLS-G-L-ERGTKRRYRL  | 357   |       |             |
| ESPL1_YEAST                                                                         | 251         | VECFSKNLLHKNYLEMGPN---K-IYLSN--FYLSYSMLYD-G-----L   | 287   |       |             |
| ESPL1_HUMAN                                                                         | 358         | DAILSLFAFLGGYCSLLQ-QLRDDGVYGGSSKQQQSFLQMY--F-QG-LH  | 402   |       |             |
| ESPL1_YEAST                                                                         | 288         | DKIM-LLDIL-SYEETTEVQ-R--AI---KSKKE--FNE-YCNMSENRL-  | 325   |       |             |
| ESPL1_HUMAN                                                                         | 403         | LY---TV-----VYD---FAQ--GCQIVDLADLTQ-LVDSCKSTVVW-M   | 437   |       |             |
| ESPL1_YEAST                                                                         | 326         | LWSCISVDDLNVILENATNFLQNKG-KHIS-ATL-KCLV--C----LWST  | 366   |       |             |

|             |      |                                                    |      |
|-------------|------|----------------------------------------------------|------|
| ESPL1_HUMAN | 438  | LEALEGL-SGQE-LT--DHGMTASY-TSNLAYSFYSHKLYAE-ACA-IS  | 480  |
| ESP1_YEAST  | 367  | IR-LEGLPKNKDILRQFD--CTVIYINSNK-SI--ND--ESAAALLS    | 406  |
| ESPL1_HUMAN | 481  | EPLCQHLGLVKPGTYPEVPEKLRHC--FRLQVESLKKLGKQAGCKMV-   | 527  |
| ESP1_YEAST  | 407  | E-L--LGVL--S--EI-----CIDYK--EP-KRL--S--NIIS        | 430  |
| ESPL1_HUMAN | 528  | ILWLAA-L-QPCSPHEMAEPTVFWVRVKMDAARAGDKELQLKTLRDSLGS | 575  |
| ESP1_YEAST  | 431  | VLFNASVLFK--S--H--SF-L-LK--TA--NLEIS-NVL--ISN      | 460  |
| ESPL1_HUMAN | 576  | WDPETLA--LLREELQAYKAV-RADTGOER-----FNIICDLL--E-    | 612  |
| ESP1_YEAST  | 461  | -DSKT-SHRTILKFE----KFISSAQSAQKIEIFSCLPNVYC-MLRNDT  | 503  |
| ESPL1_HUMAN | 613  | LS---PE--ETPAGAWARA-THVELAQVLCYHDFQTQNTCSALDAIREA  | 656  |
| ESP1_YEAST  | 504  | LSFVF-DFCQ--NAFIHCFTRL-KITKFI--EF--SN-SS-E-I--M    | 537  |
| ESPL1_HUMAN | 657  | LQLL--DSVR--PEAQAR-DQLLDDKAQALLWLVICTLEAKMQEGI-ER  | 699  |
| ESP1_YEAST  | 538  | LSVLYGNSSIENIP-SE-NWSQL----SR--M-IF-CSL--R--GIFDL  | 572  |
| ESPL1_HUMAN | 700  | DRRAQAPGNLEFEFVN--D----LN-YEDKIQEDRFLYSNIAFNLAADAA | 742  |
| ESP1_YEAST  | 573  | D----P--L-ELN-NTFDKHLHLNKYE--LL-IRIVY--L-LNL--D--  | 603  |
| ESPL1_HUMAN | 743  | QSKCLDQALALWKEKLTGKQAPAV-RCLQOT--AASLQILAALYQL--VA | 787  |
| ESP1_YEAST  | 604  | MSKHLTNTLS--K--ITK--L-YINKWLQKSDKAE-RI-SS-FEMDFV-  | 642  |
| ESPL1_HUMAN | 788  | KPMQALEVLLLRIVSERLKDHSKAAGSSCHITQLLLTLCG-PSYAQLHL  | 836  |
| ESP1_YEAST  | 643  | K-M--L--LCVLF--NNF-D--KL--S--I-E--LSL-CIKS--K---   | 668  |
| ESPL1_HUMAN | 837  | EAAASSLKHLDQTTDTYLL--LSL-TCD--L-LRSQLYWTHQKVTKGVS  | 879  |
| ESP1_YEAST  | 669  | EKYYSI--VPY-ADNYLLEAYLSLYMIDDALMMKNQL---QK-T--MN   | 708  |
| ESPL1_HUMAN | 880  | LLLSVLRDPALQKSSKAWYLLRVQVLQVAAYLSLPSNLSHSLWE-QLC   | 928  |
| ESP1_YEAST  | 709  | --LST--A-----K---IE-QAL-LHAS--SL--INV-H-LWSDLT     | 735  |
| ESPL1_HUMAN | 929  | A-Q--GWQT-----PEIALID--SHKL-LRSIILLMGSDILSTQKAA    | 965  |
| ESP1_YEAST  | 736  | AFQIYFG-KTLPAMKPE--LFDINNDHNLPM-S---LY--I--K-V     | 769  |
| ESPL1_HUMAN | 966  | VETSFLDYGENLVQKQVQLSEVLSCSEKLVCHLGRGVS-SEAKAF-CLE  | 1013 |
| ESP1_YEAST  | 770  | I--LL--N-I-K--IFNE--SAKL--NI-KAGNVIS-A-VIDC--      | 797  |
| ESPL1_HUMAN | 1014 | ALKLTTKQLIPRQCALFLVLKGELELARNDIDLCO-SDLQOVFLLESCT  | 1062 |
| ESP1_YEAST  | 798  | --R--KAQ--NLALSL-LK--K--KN--KLSQGS--R-LALLKSLS     | 827  |
| ESPL1_HUMAN | 1063 | EFGVTVHLDVSKVKHLQKQQAQVPCPPQLPEEELFLRGPALVELVATV   | 1112 |
| ESP1_YEAST  | 828  | -F-SFFQ-L--I-KIHIRIG--SAR-DC--EFYSKEL-SR----IISDL  | 860  |
| ESPL1_HUMAN | 1113 | AKEPGPIAPSTNSSPVLKTKPQIPNFLSHSPTCDCSLCASPVLV-AVCL  | 1161 |
| ESP1_YEAST  | 861  | --EE--PII-----VYRC--L-HFL-H-----RYY--MITEQCL       | 885  |
| ESPL1_HUMAN | 1162 | RWVLVTAGVRLAMGHQAQGLDLLQVVLKGCPEAAERLTQALQASLNHKTP | 1211 |
| ESP1_YEAST  | 886  | Q--NITLG-K-A--NKA--FDYDLA-----E-AD-IT--SL--T-      | 910  |
| ESPL1_HUMAN | 1212 | PSLVPSLLDEILAQAYTLLEAGLNQPSNESLQKVLQSG--L-K-FVAAR  | 1257 |
| ESP1_YEAST  | 911  | --MF--LYDN--KEF--VKLE--Q--SL--VLYFGDQLEKTF----     | 938  |
| ESPL1_HUMAN | 1258 | IPHLEPWRASLLLIWALTKLGL--SCCTTQLFASSGWQPPLIKSVPG    | 1304 |

|             |      |                                                    |      |
|-------------|------|----------------------------------------------------|------|
| ESP1_YEAST  | 939  | LPNL--WK-----L-HLGDIDDSIC--L--SE--YMP--KNV--       | 965  |
| ESPL1_HUMAN | 1305 | SEPSKTQG--QK-RSGRGRQKLSAPLRLNNTSOKGL-EGR-GLPCTPKP  | 1349 |
| ESP1_YEAST  | 966  | --INRVHNMWQKVMSS--Q-LEEDPF-F--KGMFESTLIGP-SSLP     | 1001 |
| ESPL1_HUMAN | 1350 | PDRIRQAGPHVFTVFEEVCPTESEKPEVQAPRVQQRVQTRLKVNFSDDS  | 1399 |
| ESP1_YEAST  | 1002 | ---V-----IPSTM--P--N--NILKTP--SKH-STGLKL--C-DS     | 1027 |
| ESPL1_HUMAN | 1400 | DLEDVPSAEAWLAEEPKRRTASRGRGRARGLSLKTDVAVPGSAPGNP    | 1449 |
| ESP1_YEAST  | 1028 | ----PRSS-S-MT--P-----RGK-NIRQ-----KFDR-IA--A----   | 1049 |
| ESPL1_HUMAN | 1450 | GLNGRSRRAKKVASRHCEERRPQRASDQARPGEIMRTIPEEEL-T-DNW  | 1497 |
| ESP1_YEAST  | 1050 | -I--S--KL-----K--QMK--ELLESL--KLDTLDN-             | 1070 |
| ESPL1_HUMAN | 1498 | RKMSFEILRGSDGEDSASGKTPAPGPEAASGEWEL-LRLDSSKKKLPSP  | 1546 |
| ESP1_YEAST  | 1071 | HELS-KI--S--SLS-SLT-----LTI-L-SN---ITS-            | 1092 |
| ESPL1_HUMAN | 1547 | CPDKES--D--KDLGPRRLRPSAPVATGL--STLDSICDSLSV-AFR    | 1586 |
| ESP1_YEAST  | 1093 | IHNAESSLITNFSLTDL-PR-HM--PL--LFDKVLNNI-DKNKYREFR   | 1133 |
| ESPL1_HUMAN | 1587 | GISHCPPSGLYAHLCRFLALCLGHRDP--YATAFLVTEVSITCRHQLLT  | 1634 |
| ESP1_YEAST  | 1134 | -VS--S--L--IA-----PNNIST--ITE--SI-----             | 1150 |
| ESPL1_HUMAN | 1635 | HLHRQLSKAQKHRGSL-EIADQLQGLSLQEMPGD-VPL-ARIQLFSFRA  | 1681 |
| ESP1_YEAST  | 1151 | ---R-VSAAQK--DLME-SN-L-NINVITI--DFCPIITGNL--LLS-K- | 1184 |
| ESPL1_HUMAN | 1682 | LESGHFPQPEKESFQERLALIPSGVTVCVLALATLQPGTVGNTLLLTR-L | 1730 |
| ESP1_YEAST  | 1185 | LE---PR-RKR--RTHLRL-P-----L--IR---SN---SRDL        | 1207 |
| ESPL1_HUMAN | 1731 | EKDSPPVSVQIP--TGQNKHLRSVLNEFDIAIQAKKE--NS-SCT-DKR  | 1774 |
| ESP1_YEAST  | 1208 | --DE--VHLSFPEAT--KKL-L-SIINESN--QTTSEVETNKIK-TREER | 1246 |
| ESPL1_HUMAN | 1775 | E-WWTGRALDHRMEVLIASLEKSVLGCW--KGLLLP--SS--EEP      | 1813 |
| ESP1_YEAST  | 1247 | KSWWTTRYDLDRMQQLLNNIENS--WFNGVQGFSPPEVVDNSLFEK-    | 1291 |
| ESPL1_HUMAN | 1814 | GPAQEASRLQELL-QDC-GWK-Y--P-----DRTLLKIMLSGAGALTP   | 1851 |
| ESP1_YEAST  | 1292 | --FKD--KFYEILHQNLPKRKLYGNPAMFIKVED-WVIELFLK----LNP | 1332 |
| ESPL1_HUMAN | 1852 | Q--D--IQALAY-----GLCPTQPERA-QE-----L--LNEAV        | 1877 |
| ESP1_YEAST  | 1333 | QEIDFLSKMEDLIYFVLDILLFHG---E-ENAYDEIDFMSLHVQLEEQI  | 1377 |
| ESPL1_HUMAN | 1878 | GRLQGLTVPSNS--HLVLVDKDLQKL-PWESMPS-LQALPVRTLPSF--  | 1921 |
| ESP1_YEAST  | 1378 | KKYRA-TMTTNSIFHTFLVSSSCH-LFPWECL-SFLKDLISITRVPSYVC | 1424 |
| ESPL1_HUMAN | 1922 | --RFLLS-YSIKEYGASPVLSQGV--DPR-STFYVLNPHN-NLSSTEE   | 1963 |
| ESP1_YEAST  | 1425 | LNK-LLSRF---HY-QLP-L-Q-VTIED-NIS--MILNP-NGDLSRTES  | 1461 |
| ESPL1_HUMAN | 1964 | QFRANFSS--EAGWR--G--VVGEVPRPEQVQEALTK--H-DLYIYAGH  | 2003 |
| ESP1_YEAST  | 1462 | KFKGMFQKIIDA--KPSSQLVMNE--KPE--EETLLKMLQNSNLFVYIGH | 1505 |
| ESPL1_HUMAN | 2004 | GAGARFLDGAVALRLSCRAVA--LLFGCSAALAVRGNLEGAGIVLKYI   | 2050 |
| ESP1_YEAST  | 1506 | GGGEQYVRSKEI-K-KCTKIAPSFLL-GCSSAAMKYGKLEPTGTIYTYL  | 1552 |
| ESPL1_HUMAN | 2051 | MAGCPLFLGNLWDVTDRIIDRYTEALLQ--GW-----LGAGPGAPL-L-  | 2090 |
| ESP1_YEAST  | 1553 | LGGCPMVLGNLWDVTDKIDKFSEELFEKMGFRCNTDDLN-G-NS-LSVS  | 1599 |

ESPL1\_HUMAN 2091 YYVNRQARQAPRLKYLGAAPAIAYGLP---VS 2118  
 |.|:::|....|:|.|.|||||.|||.|||  
 ESP1\_YEAST 1600 YAVSKSRGVCHLRYLNGAAPVIYGLPIKFVVS 1630  
 -----  
 Name 1: 1433E\_HUMAN  
 Name 2: 1433E\_DROME  
  
 14-3-3 protein epsilon OS=Homo sapiens GN=YWHAE PE=1 SV=1  
 14-3-3 protein epsilon OS=Drosophila melanogaster GN=14-3-3epsilon PE=1 SV=2  
  
 Needed for following interaction(s):  
 fly genetic RASK\_HUMAN 1433E\_HUMAN KRAS YWHAE RAS1\_DROME  
 1433E\_DROME  
  
 Length sequence 1: 255  
 Length sequence 2: 262  
 Sequence #1: 1433E\_HUMAN  
 Sequence #2: 1433E\_DROME  
 Length #1: 263  
 Length #2: 263  
 Matrix: BLOSUM62  
 Gap open: 2.0  
 Gap extend: 1.0  
 Length: 263  
 Identity: 219/263 (83.27%)  
 Similarity: 238/263 (90.49%)  
 Gaps: 12/263 (4.56%)  
 Score: 1111.00  
  

|             |     |                                                     |     |
|-------------|-----|-----------------------------------------------------|-----|
| 1433E_HUMAN | 1   | MDDREDLVYQAKLAEQAERYDEMVESMKKVAGMDVELTVEERNLLSVAYK  | 50  |
| 1433E_DROME | 1   | MTERENNVYKAKLAEQAERYDEMVEAMKKVASMDVELTVEERNLLSVAYK  | 50  |
| 1433E_HUMAN | 51  | NVIGARRASWRIISSIEQKEENKGGEDKMKMIREYR-QMVETELKLICCD  | 99  |
| 1433E_DROME | 51  | NVIGARRASWRIISIEQKEENKGAEEKLEMIKTYRGQ-VEKELRDICSD   | 99  |
| 1433E_HUMAN | 100 | ILDVLDKHLIPAANTGESKVFYFKMKG DYHRYLAEFATGNDRKEAAENSL | 149 |
| 1433E_DROME | 100 | ILNVLEKHLIPCATSGESKVFYFKMKG DYHRYLAEFATGSDRDKAAENSL | 149 |
| 1433E_HUMAN | 150 | VAYKAASDIAMTELPPTHPIRLGLALNFSVFYYEILNSPDRACRLAKAAF  | 199 |
| 1433E_DROME | 150 | IAYKAASDIAMNDLPPTHPIRLGLALNFSVFYYEILNSPDRACRLAKAAF  | 199 |
| 1433E_HUMAN | 200 | DDAIAELDTLSEESYKDSLIMQLLRDNLTLWTSMDQ-----GDGEE      | 241 |
| 1433E_DROME | 200 | DDAIAELDTLSEESYKDSLIMQLLRDNLTLWTSMDQAEEVDPNAGDGEP   | 249 |
| 1433E_HUMAN | 242 | QNKEALQDVEDEN 254                                   |     |
| 1433E_DROME | 250 | --KEQIQDVEDQD 260                                   |     |

  
 -----  
 Name 1: RS16\_HUMAN  
 Name 2: RS16\_YEAST  
  
 40S ribosomal protein S16 OS=Homo sapiens GN=RPS16 PE=1 SV=2  
 40S ribosomal protein S16 OS=Saccharomyces cerevisiae (strain ATCC 204508 / S288c) GN=RPS16A PE=1 SV=2  
  
 Needed for following interaction(s):  
 yeast genetic RASK\_HUMAN RS16\_HUMAN KRAS RPS16 IRA2\_YEAST  
 RS16\_YEAST  
  
 Length sequence 1: 146  
 Length sequence 2: 143  
 Sequence #1: RS16\_HUMAN  
 Sequence #2: RS16\_YEAST  
 Length #1: 146  
 Length #2: 146  
 Matrix: BLOSUM62

Gap open: 2.0  
 Gap extend: 1.0  
 Length: 146  
 Identity: 94/146 (64.38%)  
 Similarity: 117/146 (80.14%)  
 Gaps: 3/146 (2.05%)  
 Score: 497.00  
  

|            |     |                                                     |     |
|------------|-----|-----------------------------------------------------|-----|
| RS16_HUMAN | 1   | MPSKGPLQSVQVFRKKTATAVAHCKRGNGLIKVNGRPLEMIEPRTLQYK   | 50  |
| RS16_YEAST | 1   | M-SAVP--SVQTFGKKSATAVAHVHAKGKGLIKVNGSPITLVEPEILRFK  | 47  |
| RS16_HUMAN | 51  | LLEPVLLLGKERFAGVDIRVRVKGGGHVAQIYAIRQSISKALVAYYQKYV  | 100 |
| RS16_YEAST | 48  | VYEPLLLVGLDKFNSNIDIRVRVTGGGHVSQYVYAIRQAIKGLVAYHQKYV | 97  |
| RS16_HUMAN | 101 | DEASKKEIKDILIQYDRTLVLVADPRRCESKFFGGGARARYQKSYR      | 146 |
| RS16_YEAST | 98  | DEQSKNELKKAFTSYDRTLIIADSRPEPKKFGGKARSRFQKSYR        | 143 |

  
 -----  
 Name 1: GSK3A\_HUMAN  
 Name 2: RIM11\_YEAST  
  
 Glycogen synthase kinase-3 alpha OS=Homo sapiens GN=GSK3A PE=1 SV=2  
 Serine/threonine-protein kinase RIM11/MSD1 OS=Saccharomyces cerevisiae (strain ATCC 204508 / S288c) GN=RIM11 PE=1 SV=1  
  
 Needed for following interaction(s):  
 yeast physical GSK3A\_HUMAN RASK\_HUMAN GSK3A KRAS RIM11\_YE  
 AST IRA2\_YEAST  
  
 Length sequence 1: 483  
 Length sequence 2: 370  
 Sequence #1: GSK3A\_HUMAN  
 Sequence #2: RIM11\_YEAST  
 Length #1: 401  
 Length #2: 401  
 Matrix: BLOSUM62  
 Gap open: 2.0  
 Gap extend: 1.0  
 Length: 401  
 Identity: 210/401 (52.37%)  
 Similarity: 274/401 (68.33%)  
 Gaps: 71/401 (17.71%)  
 Score: 1066.00  
  

|             |     |                                                      |     |
|-------------|-----|------------------------------------------------------|-----|
| GSK3A_HUMAN | 82  | AGTSFPPPGVKLGRD--SGK-VTTVVA----TLGQGP-ERSQEVAY-TDI   | 122 |
| RIM11_YEAST | 5   | SNNS---P--NLSNNIVS-KQV--YYAHPPTI--DPNDFVQ- ISFPT-T   | 42  |
| GSK3A_HUMAN | 123 | KVIGNGSFGVVYQAR-LAETRELVAIKKVLQDKRFRKNRELQIMRKLDFHCN | 171 |
| RIM11_YEAST | 43  | EVVGHGSGFVVV-ATVIQETNEKVAIKKVLQDKRFRKNRELEIMKMLSHIN  | 91  |
| GSK3A_HUMAN | 172 | IVRLRYFFYSSGEK--KDELYLNLVLEYPVETVY-RVARHFTKAKLTIPI   | 218 |
| RIM11_YEAST | 92  | IIDLKYFFY---ERDSQDEIYLNLILEYMPQSLYQRL-RHFVHQRT-PM    | 135 |
| GSK3A_HUMAN | 219 | --LYVKVYMYQLFRSLAYIHS-QGVCHRDIKPNLLVDPDT-AVLKLCDF    | 264 |
| RIM11_YEAST | 136 | SRLEIKYMFQLFKSLNLYLHFFANVCHRDIKPNLLVDPETWS-LKLCDF    | 184 |
| GSK3A_HUMAN | 265 | GSAKQLVR-GEPNVSYICSRYYRAPELIFGATDYTSSIDVWSAGCVLAEAL  | 313 |
| RIM11_YEAST | 185 | GSAKQL-KPTEPNVSYICSRYYRAPELIFGATNYTNQIDIWSSGCVMAEL   | 233 |
| GSK3A_HUMAN | 314 | LLGQPIFPDGSQVLDVEIKVLTPTREQIREMNPNYTEFKFPQIKAHP      | 363 |
| RIM11_YEAST | 234 | LLGQPMFPGESGIDQVLEIKILGTPSKQEICSMNPNYMEHKFPQIKPIP    | 283 |
| GSK3A_HUMAN | 364 | WTKVFK---SRTPEAIALCSSLLEYTPSSRPLSPLA-CAHS-FFDELRC    | 408 |
| RIM11_YEAST | 284 | LSRVFKKEDDQT-VEFLA---DVLKYDPLERFNAQLCQLC--SPYFDELK-  | 326 |

```

GSK3A_HUMAN      409 L--G--TQLPNN-RPLPPL-F--NFSAGELSIQP-SLNAI---LIPPHLR      446
RIM11_YEAST      327 LDDGKINQITTDLK-L--LEFDENVELGHLS--PDELSVVKKLYP---K      368
-----
GSK3A_HUMAN      447 S          447
RIM11_YEAST      369 S          369
-----
Name 1: PEX13_HUMAN
Name 2: PEX13_YEAST

Peroxisomal membrane protein PEX13 OS=Homo sapiens GN=PEX13 PE=1 SV=2
Peroxisomal membrane protein PAS20 OS=Saccharomyces cerevisiae (strain ATCC 2045
08 / S288c) GN=PEX13 PE=1 SV=1

Needed for following interaction(s):
yeast genetic RASK_HUMAN      PEX13_HUMAN      KRAS      PEX13      IRA2_YEAST
PEX13_YEAST

Length sequence 1:      403
Length sequence 2:      386
Sequence #1: PEX13_HUMAN
Sequence #2: PEX13_YEAST
Length #1: 445
Length #2: 445
Matrix: BLOSUM62
Gap open: 2.0
Gap extend: 1.0
Length: 445
Identity: 149/445 (33.48%)
Similarity: 213/445 (47.87%)
Gaps: 147/445 (33.03%)
Score: 615.00

PEX13_HUMAN      1 MASQPPPPPPKWPETRRIPGAG-PGPGGPTFQ-SA-DLGP TLMT-----      41
PEX13_YEAST      1 MSSTAVPRPKPWET----SASLEEP-----QRNAQSLS-AMMTSNQQDS      39

PEX13_HUMAN      42 RP-----GQPALTRVPPPILPRP----SQQT-G-SSSV-----NT----      70
PEX13_YEAST      40 RPTEESNNSNSA-SESAPVLRPRAALNSSGTYGESNTIPGIYGNNSNYGI      88

PEX13_HUMAN      71 -F--RPAYS--S-F-SS-G-YGAYGNISFYG-GY-SPYSY--GYN-GLGYN      106
PEX13_YEAST      89 PYDNNP-YSMNSIYGNISIGRYG-YGGSYYGNNYGS-F-YGGGYGAGAGYG      134

PEX13_HUMAN      107 RLRVDDLPPSRFVQQAEESRGAQSIESIVHA---FASVSMMDATFSA      153
PEX13_YEAST      135 ---MNN--GSG-L--G-ESTKATFQLIESLIGAVTGFA---QMLESTYMA      172

PEX13_HUMAN      154 VYNSFRAVLVDVANHFSRLK--I-HFTKVFSAFALVRTI--RYLYRRLQ- RM      198
PEX13_YEAST      173 THNSFFTMTISVAEQFGNLKEMLGSF---FGFIAIMKFLKKILYRATKGR-      218

PEX13_HUMAN      199 LGL--R-----RGSSEN---EDL--WAESEGTVACLAEDRAATSAAK-SW-      234
PEX13_YEAST      219 LGIPPKNFAESESGSKNKLIEDFOKFNDS-GTI---NSNEK-ATRRKISWK      263

PEX13_HUMAN      235 PIFLFF--AVILGGPYL----IWKLLSTHSDEVTDSDINWAS---G-E--D      272
PEX13_YEAST      264 PL-LFFFLMAV-FGFPYLLNKFITK-LQT-SG--T--IR-ASQNGNGSEPID      304

PEX13_HUMAN      273 -DHV-VARAEDYFAAVSE--E-EISFRAGDMLNLA--LKEQQPKV-R-G--      312
PEX13_YEAST      305 PSKLEFARALYDF--VPENPEMEVALKKG-D-L-MAILSKKDP-LGRDSDW      349

PEX13_HUMAN      313 WLLASLDGQTTLGIPANYKILGKRKRGRKTVSESSKVSQQQSFNT      357
PEX13_YEAST      350 WKVVRTKNG-NIGYIPNYIEII-KR--RKKIE--HVDDETR--TH      386
-----
Name 1: DPOD1_HUMAN

```

```

Name 2: DPOD_YEAST

DNA polymerase delta catalytic subunit OS=Homo sapiens GN=POLD1 PE=1 SV=2
DNA polymerase delta catalytic subunit OS=Saccharomyces cerevisiae (strain ATCC
204508 / S288c) GN=POL3 PE=1 SV=3

Needed for following interaction(s):
yeast genetic DPOD1_HUMAN      MUS81_HUMAN      POLD1      MUS81      DPOD_YEAST
MUS81_YEAST

Length sequence 1:      1107
Length sequence 2:      1097
Sequence #1: DPOD1_HUMAN
Sequence #2: DPOD_YEAST
Length #1: 1165
Length #2: 1165
Matrix: BLOSUM62
Gap open: 2.0
Gap extend: 1.0
Length: 1165
Identity: 566/1165 (48.58%)
Similarity: 759/1165 (65.15%)
Gaps: 155/1165 (13.30%)
Score: 2856.00

DPOD1_HUMAN      4 KRRP---GPG--P-G----VPP----K-RARGGLW--DDDD--APR-PSQ      33
DPOD_YEAST      27 KRQSIDHGVGSEPVSTIEIIPSDSFRKYNISG--FKAKDIDLMTQLEST      74

DPOD1_HUMAN      34 FEEDLALMEEMAEHRLQEQEEELQSVLEGVADQVPPSAIDPRWLRLPT      83
DPOD_YEAST      75 FEQDVS---QM--EHDMDAQEEHDLSS-FE-----R-----KK-L-PT      104

DPOD1_HUMAN      84 PPALDPQTEPL--I-FQOLEIDHYVGPA-QVPVGGPPPSRGSVFVLRAGF      129
DPOD_YEAST      105 D--FDP--S--LYDISFQQ--ID-----AEQSVLNGIKDENTST-VVRF      141

DPOD1_HUMAN      130 VTDEGFSVCCIHGFAPYFYTPAPPFGPEHMGDLQRELN-LA--ISRDS      176
DPOD_YEAST      142 VTSEGHSLVLCNVTGFKNYLYVPA-PN-SSD-AND-QEQINKFVHYLN---      184

DPOD1_HUMAN      177 RGGRELT-GPAVLAVELCSRESMFGYHGHPSPFLRITVALPRLVAPARR      225
DPOD_YEAST      185 ----E-TFDHAIDSIYVSKQSIWGSYSGDTKLPFWKIYVYTPHMVNKLR      229

DPOD1_HUMAN      226 LLEQG-I--R--VAGLGTFSFAPYEANVDFEIRFMVDTDIVGCNWLLEPA      270
DPOD_YEAST      230 AFERGHLSFNSWFSN-GTTT---YD-NIAYTLRLMVDGIVGMSWITLPK      274

DPOD1_HUMAN      271 GKYLRLKE---KATQCQLEADVLSVSVHPPEGFWRQIAPLRLVLSFDI      317
DPOD_YEAST      275 GKYSM-I-EPNNRVSSCQLEVSINYNRLIAHPAEGDWSHTAPLRIMSF      322

DPOD1_HUMAN      318 ECAGRKGIFPEPERDPVQIQCS-LGLRWGEPEPFLRLALTLRRCAPILGA      366
DPOD_YEAST      323 ECAGRIYVVFPEPEYDPVIQIANVVSIA-GAKKPFIRNVFTLNTCSPITGS      371

DPOD1_HUMAN      367 KVQSYEKEEDLLQAWSTFIRI-MDPDVTITGNIQNFDLPYLISRAQTLKV      415
DPOD_YEAST      372 MIFSHATEEEMLSNWRNF-I-KVDPDVIIGYNTTNFDIPYLLNRAKLV      420

DPOD1_HUMAN      416 QTFPFLGRVAGLCSNIRDSSFQSKQTGRRDTKVVMV-GRVQMDMLQVLL      464
DPOD_YEAST      421 NDFPYFGRKLTVKQEIKEVSVFSSKAYGTRETKNVN-IDGRLQLDLLQFIQ      469

DPOD1_HUMAN      465 REYKLRSYTLNAVSPHFLGEQKEDVQH-SIITDQLQNGD-QTRRRLAVYC      512
DPOD_YEAST      470 REYKLRSYTLNAVSAHFLGEQKEDV-HYSIISDLQNG-DSETRRRLAVYC      517

DPOD1_HUMAN      513 LKDAYLPLRLLERLMVLVNAVEMARVTGVPLSYLLSRGQVKVVSQLLRQ      562
DPOD_YEAST      518 LKDAYLPLRLEKLMALVNYTEMARVTGVPFSYLLARGQIKVVSQVLRFR      567

DPOD1_HUMAN      563 AMHEGL--LMPVVKSEGGED-YTGATVIEPLKGYDVPIATLDFSSLYPS      609

```

```

DP0D_YEAST      568 CL-E-IDTIVIPNMQSQASDDQYEGATVIEPIRGYDVP IATLDFNSLYPS      615
DP0D1_HUMAN    610 IMMAHNLCYTTLLRPQTAQKLG--TEDQFIRTPGTGDEFVKTTSVRKGLLP      657
DP0D_YEAST      616 IMMAHNLCYTTLCNKATVERLNLKIDED-YVITPNGDYFVTTKRRRIGILP      664
DP0D1_HUMAN    658 QILENLLSARKRAKAEAKETDPLRRQVLDRQLALQVANSVYGFQTAQ      707
DP0D_YEAST      665 IILDELISARKRAKDLRDEKDPFKRDVNLGRQLALKISANSVYGFQTAQ      714
DP0D1_HUMAN    708 VGKLPCLLEISQSVTGFGRQMIKTKQLVESKYTVENGYSTSAKVYVYDGT      757
DP0D_YEAST      715 VGKLPCLAISSSVTAYGRMTMLKTKTAVQEKYCIKNGYKHDVVYVYDGT      764
DP0D1_HUMAN    758 SVMCRFGVSSVAEAMALGREAADVWSGHFPPSPIRLEFEKVFYFPYLLISK      807
DP0D_YEAST      765 SVMVKGFTTDLKEAMD LGTEAAKYVSTLFKHPINLEFEKAYFPYLLINK      814
DP0D1_HUMAN    808 RYAGLLFSSRPDAHDRMDCKGLEAVRRDNCPLVA--NLVTASLRRLID      854
DP0D_YEAST      815 RYAG-LFWTNPDKFDKLDQKGLASVRRDSCSLVSIVMNKV---LKKILIE      860
DP0D1_HUMAN    855 RDPEGAVAHQDVISDLLCNRIDISQLVITKELTRAASDYAGKQAH-VEL      903
DP0D_YEAST      861 RNVDGALAFVRETINDILHNRVDISKLIISK--T-LAPNYTNPQPHAV-L      906
DP0D1_HUMAN    904 AERMKRDRPGSAPSLGDRVPYVVIISA-AGVAAVMKSEDPFLFVLEHSLPI      952
DP0D_YEAST      907 AERMKRRE-GVGNVGDVYVVIIGGNDK-L--YNRAEDPLFVLENNIQV      952
DP0D1_HUMAN    953 DTQYYLEQQLAKPLLRIFEPILGEGRAEAVLLRGDHTRCKTV-L-TG--K      998
DP0D_YEAST      953 DSRYYLTNQLQNP IISIVAPIIGD-K-QA---NGMFV-VKSIKINTGSQK      996
DP0D1_HUMAN    999 VGGLLAFAKR-RNC--CIG-CRTVLSHQGAVCEFCQPRESELYQKEVSH-      1043
DP0D_YEAST      997 -GGLMSFIKKVEACKSCKGFLR---KGBGPLCSNCLARSGELYIKAL-YD      1041
DP0D1_HUMAN    1044 LNALEERFSRLWTQCQRCQGLSHEDVICTSRDCPIFYMRKVKRKDLEDQ-      1092
DP0D_YEAST      1042 VRDLEEKYSRLWTQCQRCAGNLHSEVLCSNKNCDIFYMRVVKVKELQEKV      1091
DP0D1_HUMAN    1093 EQLLRRFPGPPPEAW      1107
DP0D_YEAST      1092 EQ-LSK-----W      1097

```

Name 1: BOPl\_HUMAN  
Name 2: ERB1\_YEAST

Ribosome biogenesis protein BOPl OS=Homo sapiens GN=BOPl PE=1 SV=2  
Ribosome biogenesis protein ERB1 OS=Saccharomyces cerevisiae (strain ATCC 204508 / S288c) GN=ERB1 PE=1 SV=1

Needed for following interaction(s):

| yeast | physical    | BOPl_HUMAN | MUS81_HUMAN | BOPl | MUS81 | ERB1_YEA |
|-------|-------------|------------|-------------|------|-------|----------|
| ST    | MUS81_YEAST |            |             |      |       |          |

Length sequence 1: 746  
Length sequence 2: 807  
Sequence #1: BOPl\_HUMAN  
Sequence #2: ERB1\_YEAST  
Length #1: 860  
Length #2: 860  
Matrix: BLOSUM62  
Gap open: 2.0  
Gap extend: 1.0  
Length: 860  
Identity: 353/860 (41.05%)  
Similarity: 496/860 (57.67%)  
Gaps: 169/860 (19.65%)  
Score: 1744.00

```

BOPl_HUMAN      1 MAGSRGAGRTA-AP-SVRPEKR-RSEPELEPEPEPEPLLLCTSP--SHS      45
ERB1_YEAST      2 MA--KN-NKTTEAKMS---KKRAASE-ESDVE-EDEDKLLSVDGLIDAEA      43
BOPl_HUMAN     46 TGSDSGVSDSE-ES-VFSGLE-DSGS-----DSSEDD-D-E-----GDEE      80
ERB1_YEAST     44 SESDE--DDDEYESAV-E--EKESSSDKEAQDSDSDSDAELNKLLEAEE      88
BOPl_HUMAN     81 GEDGALD-D--EGHSGIKKTE--EQ--VQAST--PCPR--TEMA--SA      116
ERB1_YEAST     89 G-DGEEDYDSSE-FS--DDTTSLTDRLSGVKLTQIVD-PNIYSKYADGSD      133
BOPl_HUMAN    117 R-IGDE----Y-AEDSSDEEDIRNTVGNVPLEWYDDFPFHVGYDLDGRRIY      160
ERB1_YEAST    134 RIIKPEINPVYDSD--SDAE-TQNTIGNIPLSAYDEMPHIGYDINGKRIM      181
BOPl_HUMAN    161 KPLRTRDELQFLDKMDDPDYWRT-VQDPMTGRDLRLTDEQVALVRRLQ-      208
ERB1_YEAST    182 RPAK-GSALDQLLDSIELPEGW-TGLLDKNSGSSNLTKELELISKIQR      229
BOPl_HUMAN    209 SGQFGDVGFNPEYPAVDFFS--GDVMIHPVTNRPADKRSFIPSLVEK-E-      254
ERB1_YEAST    230 NEQTD--SINPYEPLIDWFTRHEEVM--PLTAVPEPKRRFVPS---KNEA      273
BOPl_HUMAN    255 K-VSRMVHAIKMG-WIQPR-----RPRDPTPSF-YDLWAQE-DPNAVLGR      295
ERB1_YEAST    274 KRVMKIVRAIREGRIIPPKKLEKMEKEKIEYQYDLWDGSDSTETN----D      319
BOPl_HUMAN    296 HKMHVPAKPLALPGHAESYNPPPEYLLSEEERLAWEQEPGERKLSFLPR      345
ERB1_YEAST    320 HVMHLRAPKLPPTNEESYNPPEEYLLSPEEKEAWENTYSERERNFIPQ      369
BOPl_HUMAN    346 KFPSLRVAVPAYGRFIQERFERCLDLYLCPRQRKMRVNVDPEDLIPKLP      395
ERB1_YEAST    370 KYSALRKVPYGESIRERFERSLDLYLAPRVKKNLNI DPNSLIPPELSP      419
BOPl_HUMAN    396 RDLQFPF-TCQALVYRGHSDLVRLCSVSPGGQWLVS GSDGSLRLWEVAT      444
ERB1_YEAST    420 KDLRPFPIRC-STIYAGHKGVRLTSDPSGLWLATGSDGTVRVWEILT      468
BOPl_HUMAN    445 ARCV-RT--V-----PVGGV-VKSVAVNPSPA---VCLVAAAV-EDSV-L      480
ERB1_YEAST    469 GREVYRRTLIDDEENP--DYHIECIEWNPD-ANNGI-L-AVAVGE-NIHL      512
BOPl_HUMAN    481 LLNPALG-DRLVA--GST---DQL-LSAF--VPP-----E      506
ERB1_YEAST    513 IVPPIFGYD--IENNGTKIEDGFYDFTFGTVKKS NLEVNENGDGEDGE      560
BOPl_HUMAN    507 -EP--PL--QPARWLEASE-E-ERQVGLRLRI-CHGKPVTVQVTHWGR-G      546
ERB1_YEAST    561 NESAKNAVKKQVAQWNKPSQKLEKDI-C-ITISCK-KTVKKSLSWH-RKG      606
BOPl_HUMAN    547 DYLAVALAT-Q---GHTQVLIHQLSRRRSQSPFRSHGQVQRV--A-FHP      589
ERB1_YEAST    607 DYF--V--TVQPSDGNSTVLIHQVSKHLTQSPFKKSKG-I--IMDAKFHP      649
BOPl_HUMAN    590 ARPFLLVASQRSVRLYHLLRQE-LTKKLMNPCKWVSSSLAVHPAGDNVICG      638
ERB1_YEAST    650 FKPQLFVCSQRYVRIYD-LSQQILVKKLLPGARWLKIDIHPRGDNLIAS      698
BOPl_HUMAN    639 SYDSKLVWFDL DL-STKPYRMLRHKKALRAVAFHPRYPLFASGSDDGVS      687
ERB1_YEAST    699 SFDKRVLWHDLDLAST-PYKTLRYHEKAVRSVNFHKKLPLFSSAADDGTI      747
BOPl_HUMAN    688 IVCHGMVYNDLLQNPLLVKVLKGH-VLTRDLGVLDVIFHPTQPWFVSS      736
ERB1_YEAST    748 HVFHATVYDDMMKNPMIVPLKKTGHKVI-NSLGLVDAIWHPREAWLFS      796
BOPl_HUMAN    737 GADGTVRLFT      746
ERB1_YEAST    797 GADNTARLWT      806

```

Name 1: PP2AB\_HUMAN





| BIM1_YEAST                                                                                                               | 278 GFEMNDGEDELNDKNLGEHGTVP--NQGGY                      | 305                                             |
|--------------------------------------------------------------------------------------------------------------------------|---------------------------------------------------------|-------------------------------------------------|
| -----                                                                                                                    |                                                         |                                                 |
| Name 1: MRCKA_HUMAN                                                                                                      |                                                         |                                                 |
| Name 2: HSL1_YEAST                                                                                                       |                                                         |                                                 |
| Serine/threonine-protein kinase MRCK alpha OS=Homo sapiens GN=CDC42BPA PE=1 SV=1                                         |                                                         |                                                 |
| Probable serine/threonine-protein kinase HSL1 OS=Saccharomyces cerevisiae (strain ATCC 204508 / S288c) GN=HSL1 PE=1 SV=1 |                                                         |                                                 |
| Needed for following interaction(s):                                                                                     |                                                         |                                                 |
| yeast                                                                                                                    | genetic                                                 | PTTG1_HUMAN MRCKA_HUMAN PTTG1 CDC42BPA SECU_YEA |
| ST                                                                                                                       | HSL1_YEAST                                              |                                                 |
| Length sequence 1:                                                                                                       | 1732                                                    |                                                 |
| Length sequence 2:                                                                                                       | 1518                                                    |                                                 |
| Sequence #1:                                                                                                             | MRCKA_HUMAN                                             |                                                 |
| Sequence #2:                                                                                                             | HSL1_YEAST                                              |                                                 |
| Length #1:                                                                                                               | 2051                                                    |                                                 |
| Length #2:                                                                                                               | 2051                                                    |                                                 |
| Matrix:                                                                                                                  | BLOSUM62                                                |                                                 |
| Gap open:                                                                                                                | 2.0                                                     |                                                 |
| Gap extend:                                                                                                              | 1.0                                                     |                                                 |
| Length:                                                                                                                  | 2051                                                    |                                                 |
| Identity:                                                                                                                | 526/2051 (25.65%)                                       |                                                 |
| Similarity:                                                                                                              | 836/2051 (40.76%)                                       |                                                 |
| Gaps:                                                                                                                    | 855/2051 (41.69%)                                       |                                                 |
| Score:                                                                                                                   | 1694.00                                                 |                                                 |
| MRCKA_HUMAN                                                                                                              | 1 MSGEV-RLRQLEQFILDG-PAQ-TNGQCFSVETLLDILICLYDCNNSPL     | 47                                              |
| HSL1_YEAST                                                                                                               | 1 MTGHVSKTSHVPK----GRPSSLAK-KA-AKRAMAKV-----NSNP-       | 35                                              |
| MRCKA_HUMAN                                                                                                              | 48 RR-----EKNILEYL-EWA-K---P-FT-SKV--K-QMLRHRED----F    | 77                                              |
| HSL1_YEAST                                                                                                               | 36 KRASGHLER-VVQSVND-ATKRLSQPDSTVS-VATKSSKRKSR-DTVGPW   | 81                                              |
| MRCKA_HUMAN                                                                                                              | 78 EIL-KVIGRGAFGEVAVVKL-KNAD--KVFAMKIL-----             | 108                                             |
| HSL1_YEAST                                                                                                               | 82 K-LGKTLGKGSGR---VRLAKNMETQLAAIKIVPKKAFVHCSNNGTV      | 127                                             |
| MRCKA_HUMAN                                                                                                              | 109 -NKW--EML-KRAET---ACFRE-----ERDVLVNGDNKWITT         | 139                                             |
| HSL1_YEAST                                                                                                               | 128 PNSYSSMVTSNVSSPSIAS-REHSNHSQTNPYGIEREIVI---MKLIS-   | 172                                             |
| MRCKA_HUMAN                                                                                                              | 140 LH---YA-FQ--DDN--NLYLVMDYYV-GGDLT-LLSKFEDRLPE-DMA   | 178                                             |
| HSL1_YEAST                                                                                                               | 173 -HTNVMALFEVW-ENKSELYLVLE-YVDGGELFDYLVSK--GKLPERE-A  | 216                                             |
| MRCKA_HUMAN                                                                                                              | 179 RFYLAEMVIAIDSVHQLH-Y-V-HRDIKPDNILMD-MNGHIRLADFG-SC  | 223                                             |
| HSL1_YEAST                                                                                                               | 217 IHYFKQ--I-VEGVSCHSFNICHRDLKPENLLDKNRRIKIADFGMAA     | 263                                             |
| MRCKA_HUMAN                                                                                                              | 224 L---KLMEDGTVQSSVAVGTPDYISPEILQAMEDGKGR-Y--GPECDWW   | 266                                             |
| HSL1_YEAST                                                                                                               | 264 LELPNKLLK--T---S--CGSPHYASPEIV--M---GRPYHGGPS--DVW  | 299                                             |
| MRCKA_HUMAN                                                                                                              | 267 SLGVCMYEMLYGETPFYAESLVETYGKIMNHK-E--RFQFPAQVTDVSEN  | 313                                             |
| HSL1_YEAST                                                                                                               | 300 SCGIVLFPALLTGHLPFNDDN-IK---KLL-LKVQSGKYQMPNSLS--SE- | 341                                             |
| MRCKA_HUMAN                                                                                                              | 314 AKDLIRR-LICREHRL-GQNGIEDFKKHPFFSGI-DWDNIRNCEAPYIP   | 360                                             |
| HSL1_YEAST                                                                                                               | 342 ARDLISKILVIDPEKRITQ---E-ILKHPL---IKKYDDL----P-VN    | 378                                             |
| MRCKA_HUMAN                                                                                                              | 361 EV---SSPTDT-----SNFDVDDCLKN-SETMPP-PT-HTAFSGHHLPFV  | 400                                             |
| HSL1_YEAST                                                                                                               | 379 KVLKRMRKDNMARGKSNSDL--HLLNVS---PSIVTLHS--RGE---I    | 417                                             |
| MRCKA_HUMAN                                                                                                              | 401 GFTYTSSCVLSDRSCLRV-AGPTSLDLVNV--VQRTL--DN---NLAT    | 441                                             |
| HSL1_YEAST                                                                                                               | 418 ----DES-IL--RS-LQILWHG-VSREL-ITAKLLQKPMSEELKLFYSLLL | 457                                             |
| MRCKA_HUMAN                                                                                                              | 442 EAYERR--IKRLEQEKLERSRKLQESTQ-TV-Q-ALQY-S-TVD--GFLT  | 482                                             |

|             |                                                         |      |
|-------------|---------------------------------------------------------|------|
| HSL1_YEAST  | 458 Q-YKQRHSIS-LSSSS-E-NKK--SATESSVNEPRIEYASKTANNTG-L-  | 499  |
| MRCKA_HUMAN | 483 ASKDLKIKNKEEIEKLRKQVTESSHLEQQLEEANA---VRQELDDAFRQ   | 529  |
| HSL1_YEAST  | 500 RSENNDVKTL-HSLE-IHSED-T-ST-VNQN---NAITGVNTEI-NA--P  | 538  |
| MRCKA_HUMAN | 530 IKAYEK-Q--IKTLQO-EREDLNK---E---L-----V-QA-SERL-KNQ  | 561  |
| HSL1_YEAST  | 539 VLA-QKSQFSINTLSQPE-SD---KAEABAVTLPPAIPIFNASSSRIFRN- | 583  |
| MRCKA_HUMAN | 562 S-KELKDAHCQRKLAHQEFMEINERLTEL--HTQKQKLARHVRDKKEEVD  | 608  |
| HSL1_YEAST  | 584 SYTSI-SSR-SRR-SLR--LS-NSRLS-LSASTSRETV--H--D--NEMP  | 620  |
| MRCKA_HUMAN | 609 LVMQ--KVESLRQELRRTERAKKELEVHTEALAAEASKD-RK-L-REQ-S  | 652  |
| HSL1_YEAST  | 621 L-PQLPKSPS-RYSLSR--RA-----IH---ASPSTKSIHKLSLRKNIA   | 657  |
| MRCKA_HUMAN | 653 EHY-SKQ-LENELEGLKQKQISYSPGVCISIEHQEITK--LK-TDLEKKS  | 697  |
| HSL1_YEAST  | 658 ATVAARRTLQNSAS--K-RSL-Y-----SL---QSIKRSRLNLDL---L   | 692  |
| MRCKA_HUMAN | 698 IFYEEEL-SKREGIHANE-IKNLKKELH--DSEGO-QLAL-NKEIMI---  | 738  |
| HSL1_YEAST  | 693 VF-DDPLPSKPKP---ASENV-N-KSEPHSLESDFEILCD-QILFGNA    | 734  |
| MRCKA_HUMAN | 739 LKDK-LEKTRRESQSEREFESEFKQQYEREKVVLTTE--EN-KKLTSEL   | 783  |
| HSL1_YEAST  | 735 L-DRILE-----E-EE-DNE-K---ERD---TQRQRQNDTK--SSA      | 763  |
| MRCKA_HUMAN | 784 DKLT-TLYENLSIHNNQLEEEVKDLADKESVAHWEAQITEIIQWVSDEK   | 832  |
| HSL1_YEAST  | 764 D--TFTI-SGVST-NK--ENE---G--PE---YP---TKI-----EK     | 788  |
| MRCKA_HUMAN | 833 DARGYLQALAS-KMTEEALRNSSLGTRATDMPWKMRRFAKLDMASARLE   | 881  |
| HSL1_YEAST  | 789 N-Q-F-N-M-SYKPS--NMS-G--LSSFP--I--FEK-E-NT---       | 815  |
| MRCKA_HUMAN | 882 LQSA-LDAEIRAKQ-AIQEEL-NKVKAS-NIITECKL-K-DS---EKKNL  | 922  |
| HSL1_YEAST  | 816 LSSSYLE-EQPKRAAL-SDITN---SFN---KMNKQEGMRIEKK-I      | 853  |
| MRCKA_HUMAN | 923 ELLSEIEQLIKDTEELR-SE-KGIEHQDSQHSFLAFLNT-PTDALDQFER  | 969  |
| HSL1_YEAST  | 854 Q---R-EQLQKND--RPSPLKPIHQE---LR-VNSLP-N--DQ-GK      | 887  |
| MRCKA_HUMAN | 970 SPST--PASKGRRTVDSTPL-S-VHT--PTLR-KKGCPS--T--G--     | 1005 |
| HSL1_YEAST  | 888 -PSLSLDP---RRNI-SQPVNSKVESLLOGLKFKKE-PASHWHTHERGSL  | 930  |
| MRCKA_HUMAN | 1006 FPPKRKTHQFFVKSFTTPKCHQCTSLMVLIRQGCSCVEVCGFSCHI--T  | 1053 |
| HSL1_YEAST  | 931 F---MSEH---VED-EKPVK---AS---D-V---SIE---SSYVPLT     | 957  |
| MRCKA_HUMAN | 1054 CVNKAPTTC--P-VPPE-QT--KGP-LGIDPQKGIGTA--Y-----     | 1085 |
| HSL1_YEAST  | 958 TV--A-TSSRDPVLAESSTIQK-PMLSL-PSSFNTSMTFKNLSQILAD    | 1002 |
| MRCKA_HUMAN | 1086 EG---HVRIP---K-----PAGVKKGWQRA-LAIV--CDFKLFLYDIA   | 1119 |
| HSL1_YEAST  | 1003 DGDDKHLVSPQNSRSVAMSHP--LRK--QSAKISLTPRSNLNANL-SVK  | 1047 |
| MRCKA_HUMAN | 1120 --EGKASQP-SVVISQVIDMRDEEFSVSSVLASDVIHASRKDIPC-IFRV | 1165 |
| HSL1_YEAST  | 1048 RNQG--S-PGS-YLSN--DL-D-----GI---SDMTFA--MEIPTNTF-- | 1078 |
| MRCKA_HUMAN | 1166 TA-S-QLSASNNKCSILMLADTENEK-N---KWVGVS-ELHKILK----  | 1204 |
| HSL1_YEAST  | 1079 TAQAIQL--MNN-----DTDNNKINTSPK-ASSFTKE--KVIKSAAY    | 1115 |
| MRCKA_HUMAN | 1205 --KNKFR-DRS-V-YVPKEAYDSTLPLIKTTQAAAI-IDHERIALGNEEG | 1248 |
| HSL1_YEAST  | 1116 ISKEK-EPDNDSTNYIP-D-Y--TIP--NTYDEKAINI-FED-A-PSDEG | 1155 |

```

MRCKA_HUMAN      1249 -LFVVHVTKDEIIRVGDNK-KIHQ--IELIPNDQLVA---VIS-GRN-RH      1289
HSL1_YEAST       1156 SL---NTSSSE---SDSRASVHRKAVS-I---DTM-ATTNVLTPATNVR-      1193

MRCKA_HUMAN      1290 VRLF--PMSALDG--RET--DFY-K--LS-ETKGCQTVTSGKVRHGALTC      1329
HSL1_YEAST       1194 VSLYWNNS--GIPRETTEEILSKLRLSPENPS-NT-----H-----      1228

MRCKA_HUMAN      1330 LCVAM-KRQVLCYELFQSKTR-HRKFKIEIQVFNVQWMAIFSEQLCVGFQ      1377
HSL1_YEAST       1229 ---MQKR-----F-SSTRGSR---D-S---NA--LGI-SQSL---Q      1252

MRCKA_HUMAN      1378 SGFLRYPPLNGEGNPYSMLHSND-HTLSFIAHQPMDAICAVEISSKEYLLC      1426
HSL1_YEAST       1253 SMF-K-DL--E-----EDQDGH-T-S---Q-AD-I--LE-SS---M-      1276

MRCKA_HUMAN      1427 FNSIGIYTDCCRQRQELMWPANPSSCCYNAPYLSVYSENAVDF-IFDV      1475
HSL1_YEAST       1277 --S---YS---KR-R-----PSE-ES--VN-P-----KQR-VTMLFD-      1299

MRCKA_HUMAN      1476 NSMEWIQTLPKVRPLNNEGSLNLLG-L--E-TIRLIYFKNKMA-EGDE      1520
HSL1_YEAST       1300 EEEE--ES---KKV-----GG---GKIKEEHT-KL---DNKISEESSQ      1330

MRCKA_HUMAN      1521 LVVP--ETSDNSRKQMRVNRINN-KRRYSFRVPEEERMQRREMLRDEMR      1567
HSL1_YEAST       1331 LVLPPVVE-----KKE---NANNTENNYS-KIPKPSI-----KVTKDTAM-      1366

MRCKA_HUMAN      1568 NKILSNPTNFNHIAHMGPGDGIQLKDLPMN---PRP-QESRT--V--F      1608
HSL1_YEAST       1367 -E--SN-TQ-TH-TKK-P-----ILKSV-QNVEVEEAPSSDKKNWFVKLF      1403

MRCKA_HUMAN      1609 SG-SVSIPSITK-SRPEPGRSMS---AS--SGLSA--RSSA--Q--NGSA      1645
HSL1_YEAST       1404 QNFS-SHNATKASKNHV-TNISFDDAHMLT-LNEFNKNSIDYQLKN---      1447

MRCKA_HUMAN      1646 L--K--R---E----FSGGSYSAK-RQPMP-S-SEGSLSSGGMDQGS-DAP      1682
HSL1_YEAST       1448 LDHKFGRKRVVEYDCKFVKGNFKFKIK--ITSTPNASSVIT--VVK-----      1488

MRCKA_HUMAN      1683 ARDFDGEDSDSPRHSTASN--SSNLSSPPSPAPRKTSLSLSESTDR--G-      1728
HSL1_YEAST       1489 -R-----S-KH---SNTSSN-----KAF-EKFND-DVERVIRNAGR      1517

MRCKA_HUMAN      1729 S      1729
HSL1_YEAST       1518 S      1518

```

```

-----
Name 1: SNW1_HUMAN
Name 2: PRP45_YEAST

SNW domain-containing protein 1 OS=Homo sapiens GN=SNW1 PE=1 SV=1
Pre-mRNA-processing protein 45 OS=Saccharomyces cerevisiae (strain ATCC 204508 /
S288c) GN=PRP45 PE=1 SV=2

Needed for following interaction(s):
yeast      physical      SNW1_HUMAN      BLM_HUMAN      SNW1      BLM      PRP45_YE
AST      SGS1_YEAST

Length sequence 1:      536
Length sequence 2:      379
Sequence #1: SNW1_HUMAN
Sequence #2: PRP45_YEAST
Length #1: 517
Length #2: 517
Matrix: BLOSUM62
Gap open: 2.0
Gap extend: 1.0
Length: 517
Identity: 165/517 (31.91%)
Similarity: 244/517 (47.20%)
Gaps: 177/517 (34.24%)

```

```

Score: 665.00

SNW1_HUMAN      34 LVSSRREPPPYGYRKGWIPRLLEDFGDGGAFPEIHVAQYPLDMGRKKKMS      83
PRP45_YEAST     1 MFSNRL-PPP---K-----H-SQ-----GR---VS      17

SNW1_HUMAN      84 NALAIQVDSEGKIKYDAIARQGO-SKDKVIYSKYTDLVPKEVMNAD-D-P      130
PRP45_YEAST     18 TALS---SD-RVE-PAILTD-QIAKN-V---KLDDFIPKRQSNFELSVP      56

SNW1_HUMAN      131 DLQRPDE-EAIKEITEKTRVALEKS-VSQKVAAMPVRAADKLA---PA      174
PRP45_YEAST     57 -L--PTKAE-IQECTART-----KSYI-QR---L-VNA--KLANSNNRA      89

SNW1_HUMAN      175 QYIRY-TPSQQVA---FNSGAKQVRVIRMVEMOKDPMPEPRFKINKKIPR      220
PRP45_YEAST     90 S-SRYVTETHQAPANLLLN--SHH-IEVVSQMDPL-LPRF-VGKK-AR      132

SNW1_HUMAN      221 ---GP-PSPP-APVMH---SPSR-KMTVKEQQEWKIPPCISNWKNAKGYT      261
PRP45_YEAST     133 KVVAPTEENDEVVPLHMDGSDNRGE---ADPNEWKIPAAVSNWKNPNGYT      179

SNW1_HUMAN      262 IPLDKRL--AADGRGLQTVHINENFAKLAELIADRKAREAVEMRAQVE      309
PRP45_YEAST     180 VALERRVVKALDNE-N--INDGFMKLSEALENADKKARQ--EIRSKME      224

SNW1_HUMAN      310 -RKMAQKEKE---KHEEKLREMAQKARERRAGIKTHVEKEDGEARERDEI      355
PRP45_YEAST     225 LKRLAM-EQEMLAK-ESKLELSQRARYHN-G--T---PQTG-A-----I      260

SNW1_HUMAN      356 RHDRRKRQHDRNLSRAAPDKRSK-LQRNENRDISE-VIALGVPNPRTSN      403
PRP45_YEAST     261 --VKPK-KQ---TSTVA---RLKELAYSQGRDSEKII-LGAAK-RSEQ      298

SNW1_HUMAN      404 -EVQYDQRLFNQSKGMDSGFA-GGEDEIY-N-VYDQAWRGKDMAQSIYR      449
PRP45_YEAST     299 PDLQYDSRFF--TRGANAS-AKRHEDQVYDNPLFVQ-----QDI-ESIIK      339

SNW1_HUMAN      450 PSKNLKDMDYGDLEARIKTNRFVDPK-EFSGSDRRQRGREGPVQF---E      495
PRP45_YEAST     340 -T-NYEK-L---D-EA-V--N--V--KSE--GAS---GSHGPIQFTKAE      369

SNW1_HUMAN      496 EDPFGLDKFLEEAKQHG      512
PRP45_YEAST     370 SD---DK--SD--NYG      378

```

```

-----
Name 1: PTN13_HUMAN
Name 2: Q8I120_CAEEI

Tyrosine-protein phosphatase non-receptor type 13 OS=Homo sapiens GN=PTN13 PE=1
SV=2
Protein C09D8.1c, confirmed by transcript evidence OS=Caenorhabditis elegans GN=
ptp-3 PE=1 SV=1

Needed for following interaction(s):
worm      genetic      RASK_HUMAN      PTN13_HUMAN      KRAS      PTPN13      LET60_CAEEI
Q8I120_CAEEI

Length sequence 1:      2485
Length sequence 2:      1216
Sequence #1: PTN13_HUMAN
Sequence #2: Q8I120_CAEEI
Length #1: 1899
Length #2: 1899
Matrix: BLOSUM62
Gap open: 2.0
Gap extend: 1.0
Length: 1899
Identity: 475/1899 (25.01%)
Similarity: 716/1899 (37.70%)
Gaps: 855/1899 (45.02%)
Score: 1502.00

```

|              |      |                                                        |      |
|--------------|------|--------------------------------------------------------|------|
| PTN13_HUMAN  | 735  | MEKLDLSYIKKEE-LPKLHNTYVYGASE-KETEEFLKVCQRLT-E-YGVHF    | 780  |
| Q8I120_CAEEL | 1    | MEE-D-----EAL--LLKEFESSEVEET-----TTV-EP-TSDPFQ---      | 33   |
| PTN13_HUMAN  | 781  | HRVHPEKKSQTGILLGVCSK-GVLVFEVHNGVRTLVLRFPWRETKKISFS     | 829  |
| Q8I120_CAEEL | 34   | DSI-----S-T-I--S-C-KYGI-----INN-LEAL-L-----NKVA-S      | 58   |
| PTN13_HUMAN  | 830  | --KKKITLQNTSDGIKHG-FQTDN--SKICQYLLH--LCSYQHKFQLQM      | 871  |
| Q8I120_CAEEL | 59   | GWKYHVS--NT-DNVKDAWFRLDNATSRICG--HIGALVG--PPTNVRV      | 100  |
| PTN13_HUMAN  | 872  | RARQSNQDA--Q-DIERASFRSLNLQ-AES--VRGFNMGRAISTGSLASS     | 915  |
| Q8I120_CAEEL | 101  | EA-TSNSTAVVQWD-----FES--QKADSFVVK-Y-M-H--EPG-----      | 131  |
| PTN13_HUMAN  | 916  | TLNKLAVRPLSVQAEILK-RLSCELSLYQPLQNSSKEKNDKASWEEKPR      | 964  |
| Q8I120_CAEEL | 132  | --N-----R--MDTE--KWK-----QL-----PVV-SI-----DK-----ENPK | 153  |
| PTN13_HUMAN  | 965  | EMS-KSYHDLQASLY-PHR-----KNVIVNME-P--PPQTVAAELVGK       | 1002 |
| Q8I120_CAEEL | 154  | RFAVVS--DLN-A--HKPYAFCLAVKN--NRQGPCSDPP-TVLESV-T       | 193  |
| PTN13_HUMAN  | 1003 | PSHQMSRSDAESLAGVT-KLNNKSVASL-----NRSPERRKHESDSSSIE     | 1047 |
| Q8I120_CAEEL | 194  | PTY-M---VQNLR-VLWKTSS--SV-QLTWEYN-GP--R-----NV-        | 223  |
| PTN13_HUMAN  | 1048 | DPGQAYVLGMTMHSSGSSQVPLKEN-DVLHKRWISIVSSP-----E-        | 1088 |
| Q8I120_CAEEL | 224  | --G-FYV--N-H-TGR-KDYV---NHE-LQEK-T-MSTPGFGQDVDEK       | 257  |
| PTN13_HUMAN  | 1089 | -RE-I-TLVNLKDKAYGL--GFQII--GGEK-MGRDLGLGIFISSVAPGG     | 1130 |
| Q8I120_CAEEL | 258  | HREYLWT--NLRPHMYTIHVGVRTLPPGARKYWPQ-EV-VTITD--PTG      | 301  |
| PTN13_HUMAN  | 1131 | P--AD---L-D--GCLKPGDRLISVNSVSLE-G-VSHHAAIEIL--QN-A     | 1167 |
| Q8I120_CAEEL | 302  | PPFVDPVKLVDSGG-TQPGQQMIRLTATEEYGPISHY-WI-ILVPAVNS      | 348  |
| PTN13_HUMAN  | 1168 | PEDVTLVISQPKEKISKVPSTPVHLTNEMKNMKSSYMQDSAIDSSSKD       | 1217 |
| Q8I120_CAEEL | 349  | TEV--V-----NLD-----PIEL--E-----KA-----TA-E---K-        | 367  |
| PTN13_HUMAN  | 1218 | HHWSRGTL-RHISENSFGPSGGLREGSLSSQDSRTEASLSQSQVNGFFA      | 1266 |
| Q8I120_CAEEL | 368  | ---RAQLARSLSV-S--PS--KK--L---KR--KA---SEV-----         | 390  |
| PTN13_HUMAN  | 1267 | SHLGDQWQE--SQHGSPSPSVISKATEKETFTDSNQSKTKKPGISDVTDY     | 1315 |
| Q8I120_CAEEL | 391  | ---GDDS-QSASYH---P---K--EKR---ARRA-T-VPG-AYVT--        | 417  |
| PTN13_HUMAN  | 1316 | SDRGSDMDEATYSSSQDHQTPKQESSSVNTSNKMNFKTFSSPPKPGD        | 1365 |
| Q8I120_CAEEL | 418  | A-R---L-----SA-D-RV-KQQ---YR--N--N-----QP--            | 434  |
| PTN13_HUMAN  | 1366 | IFEVELAKNDNSL--GISVTGVNTSVRHGGIYVKAVIPQGAAESDGRH       | 1413 |
| Q8I120_CAEEL | 435  | -F-I-V--GDSQLYDGF--T--N-----Y-----P--LE---H            | 453  |
| PTN13_HUMAN  | 1414 | KGDRVLAVNGVSLGATHKQAVETLRNTGQVHLLLEKQGSPTSKEHVPV       | 1463 |
| Q8I120_CAEEL | 454  | -----N--L---H-----YR-----LMM---RA-FAKNDVR-             | 470  |
| PTN13_HUMAN  | 1464 | TPQCTLS-DQNAQQGP--EKVKTTQVKDYFVTEENTFEVKLFKNSSG        | 1510 |
| Q8I120_CAEEL | 471  | TKD---SFEQRA---PMSEKLSR--MYSD-SVLTE--PFTIK-----SA      | 503  |
| PTN13_HUMAN  | 1511 | L-GFSFSREDNLIPEQINASIV-RVKLFPQGPAAESGKIDVGDVI---L      | 1555 |
| Q8I120_CAEEL | 504  | LRG-A-SQKSS--P-WVGACIAFLV--LF-----S--I-VGMLICWWL       | 536  |
| PTN13_HUMAN  | 1556 | KVNGASLKGSLQEQEVISALRGTAPEVFLLLCRPPPGLVPEIDTALLTPLQ    | 1605 |

|              |      |                                                     |      |
|--------------|------|-----------------------------------------------------|------|
| Q8I120_CAEEL | 537  | RCN----K----K--SA--GRHP-----R--HGSITKV--A-LT---     | 558  |
| PTN13_HUMAN  | 1606 | SPAQVLPNSSKSSQPCVQSTST--SDENEMSDKSKKQCKSPSRSDSY     | 1652 |
| Q8I120_CAEEL | 559  | --GNIM-NGG--GGIPG--E--TSKLLSTSNFYG---RQIMNP-----Y   | 590  |
| PTN13_HUMAN  | 1653 | SDSSGSGEDDLVTAPANISNSTWSSALHQTLSNMVMSQAQSHHEAPKQED  | 1702 |
| Q8I120_CAEEL | 591  | -----E-QM-----N-GN-----H-----HMES--SM-D             | 604  |
| PTN13_HUMAN  | 1703 | TICTMFYYPQKIPNKPEFEDSNP-SPLPPDMA-PGQSQPQSESASSSSM   | 1750 |
| Q8I120_CAEEL | 605  | ---L--YP--LPT--SHSRSNFYAPVP--VAIP--SL-P--N-NGNNM    | 635  |
| PTN13_HUMAN  | 1751 | DKYHIHHSIEPTRQENWTPKNDLENHLEDFELEVELLITLIKSEK--S    | 1798 |
| Q8I120_CAEEL | 636  | TT--VSH--PA-----VPIA-ELANHIE--RLR-----MNNAGFQS      | 665  |
| PTN13_HUMAN  | 1799 | LGF-TV-TKGNQRIGCYVHDVIQDPAKSDGRL-KPGDRLIKVNDDTDTNM  | 1845 |
| Q8I120_CAEEL | 666  | -EFESLET-G-QHF-TWEH-----SSAD--MNK--H--K-----N-      | 690  |
| PTN13_HUMAN  | 1846 | THDAVNLLRAA-SKTVRLVIGRVLE-LPRIPMLPHLLPDITLTCNKEEL   | 1893 |
| Q8I120_CAEEL | 691  | RY--A-NV--AAYDHS-RVLLSNV-EGYP--GM-----DY-INAN---    | 720  |
| PTN13_HUMAN  | 1894 | GFSLCGGHDLSLYQVVIISDINPRS-VAAIEGNL-QLL-DVIHYVNGVSTQ | 1940 |
| Q8I120_CAEEL | 721  | -Y-V---DG-----Y--D-KPRSYIAT-QGPLPETFSF--F-----WR    | 747  |
| PTN13_HUMAN  | 1941 | GMTLEEVNRALDMSLPSVLKATRNLDLPPVPSKRSVSA---PKSTKG     | 1986 |
| Q8I120_CAEEL | 748  | -MVWEE-----QSV-TIVM-LT-N-L-----EERSRVKCDQYWP-S-RG   | 779  |
| PTN13_HUMAN  | 1987 | NGSYVSGSCSQPALTPNDSFS-TVAGEEINEIS-YPKGKCYTYQIK--GS  | 2032 |
| Q8I120_CAEEL | 780  | TATY--G-----D-IEVTL-ESVH-LAHYTM-R--TMRLKVMGE        | 811  |
| PTN13_HUMAN  | 2033 | PNLTLPE-SYIQEDDIY---D---DSQEA-VIQSLLDVDEEAQNL       | 2072 |
| Q8I120_CAEEL | 812  | PEV--REIKHLQ---YTAWPDHGVDP-HPTPFLI--FL---KRVKT-     | 846  |
| PTN13_HUMAN  | 2073 | LNENNAAG--YS-CGPGTLKMGKLSERTEDT---DCDGSPLPE---Y     | 2112 |
| Q8I120_CAEEL | 847  | LNPND-AGPII-SHCSAG-I--G-----RT-GAFIVIDC---ML-ERLRY  | 881  |
| PTN13_HUMAN  | 2113 | FTEATKMGCEEY-CEEKVSE-S-LIQKPEK--TDD---DEITWGN       | 2154 |
| Q8I120_CAEEL | 882  | --D---NTVDIYGCVTALRAQRSYMVQ-TEEQYIFIHDAVLDAVNSGST   | 924  |
| PTN13_HUMAN  | 2155 | ELPIERTNHEDSKDHSFLTNDLAVLPVVKVLPSPKTYGAN-LKSVIRV    | 2203 |
| Q8I120_CAEEL | 925  | EVPASRL-HQ-----H--L-H--ILS--Q--PS-----ADQL-S---     | 947  |
| PTN13_HUMAN  | 2204 | LRGLLDQGISPELENLQELK-PLDQCLIGQTKENRRKNRYKNILPYDAT   | 2252 |
| Q8I120_CAEEL | 948  | --G-ID--M---EFRHLTLKWTNRCVTANLVPNRKPNRMLSAVPPDSN    | 989  |
| PTN13_HUMAN  | 2253 | RV-----PLG-DEGG-YINASFIKIPVG-KEEFVYIACQGLPT--TVGD   | 2292 |
| Q8I120_CAEEL | 990  | RVIMRLLP-GAD-GSDYINASWID--GYKERGAYIATQA--PTNETAAD   | 1032 |
| PTN13_HUMAN  | 2293 | FWQMIWEQKSTVIAMM--TQVEGEKIKQRYWPNILGKT-TMVSNRLRL    | 2339 |
| Q8I120_CAEEL | 1033 | FWRAIWEHNSPIIAMLVRTNE-RGQE-QCSDYWP--L-ETGVQV--M-L   | 1074 |
| PTN13_HUMAN  | 2340 | ALVR-M-Q-QLKGFVVRAMTLEDIQTREVRHI-S-HLNFTAWPD---HD   | 2380 |
| Q8I120_CAEEL | 1075 | -VVEPMAEYDMKHYHLREFRISDINTREVRTVRQPH--FMEWPVVGKPH-  | 1120 |
| PTN13_HUMAN  | 2381 | TPSQPDDLLTFISYMRH-IH-R---SGPIIT-HCSAGIGRSGTLICIDVV  | 2424 |
| Q8I120_CAEEL | 1121 | T-A--DHFLDFVTQV--HNTYAQFGCTGP-ITVHCCSAGRTAVFIALSII  | 1165 |

|                                                                                  |         |                                                     |            |       |      |            |
|----------------------------------------------------------------------------------|---------|-----------------------------------------------------|------------|-------|------|------------|
| PTN13_HUMAN                                                                      | 2425    | LG-LISQD-LD-FDISDLVRCMLRQRHGMVQTE-DQYIFCYQVILY-VL   | 2468       |       |      |            |
| Q8I120_CAEEL                                                                     | 1166    | LDRMRAEHVVDFV--T-TVKLLRTERQNMIQ-EPEQYHFLY-LAAEYEL   | 1209       |       |      |            |
| -----                                                                            |         |                                                     |            |       |      |            |
| Name 1: GSTCD_HUMAN                                                              |         |                                                     |            |       |      |            |
| Name 2: OMS1_YEAST                                                               |         |                                                     |            |       |      |            |
| Glutathione S-transferase C-terminal domain-containing protein OS=Homo sapiens G |         |                                                     |            |       |      |            |
| N=GSTCD PE=1 SV=2                                                                |         |                                                     |            |       |      |            |
| Methyltransferase OMS1, mitochondrial OS=Saccharomyces cerevisiae (strain ATCC 2 |         |                                                     |            |       |      |            |
| 04508 / S288c) GN=OMS1 PE=1 SV=1                                                 |         |                                                     |            |       |      |            |
| Needed for following interaction(s):                                             |         |                                                     |            |       |      |            |
| yeast                                                                            | genetic | GSTCD_HUMAN                                         | RASK_HUMAN | GSTCD | KRAS | OMS1_YEAST |
| IRA2_YEAST                                                                       |         |                                                     |            |       |      |            |
| Length sequence 1: 633                                                           |         |                                                     |            |       |      |            |
| Length sequence 2: 471                                                           |         |                                                     |            |       |      |            |
| Sequence #1: GSTCD_HUMAN                                                         |         |                                                     |            |       |      |            |
| Sequence #2: OMS1_YEAST                                                          |         |                                                     |            |       |      |            |
| Length #1: 700                                                                   |         |                                                     |            |       |      |            |
| Length #2: 700                                                                   |         |                                                     |            |       |      |            |
| Matrix: BLOSUM62                                                                 |         |                                                     |            |       |      |            |
| Gap open: 2.0                                                                    |         |                                                     |            |       |      |            |
| Gap extend: 1.0                                                                  |         |                                                     |            |       |      |            |
| Length: 700                                                                      |         |                                                     |            |       |      |            |
| Identity: 171/700 (24.43%)                                                       |         |                                                     |            |       |      |            |
| Similarity: 275/700 (39.29%)                                                     |         |                                                     |            |       |      |            |
| Gaps: 327/700 (46.71%)                                                           |         |                                                     |            |       |      |            |
| Score: 473.00                                                                    |         |                                                     |            |       |      |            |
| GSTCD_HUMAN                                                                      | 18      | FSHQTEGCIPLH-----TSVTLFLL-SYCDCKIFKICLVVTKEVS-R-D   | 59         |       |      |            |
| OMS1_YEAST                                                                       | 7       | F--PT--CL--LHHIRQPASRSL-LLES--Q-R--R-SLSFT---SYKYN  | 40         |       |      |            |
| GSTCD_HUMAN                                                                      | 60      | SSLRLDDLIQDVEIQIISRQELPPIVQNCCLPAVVERSDNFCRAGLAVVL  | 109        |       |      |            |
| OMS1_YEAST                                                                       | 41      | SSHI-DD--D--K--SKKKL----KN-----VFQMNSN--R-----VI    | 65         |       |      |            |
| GSTCD_HUMAN                                                                      | 110     | RHIQKSYEADPLKKELLELLGFKKTKLKACAE--VSQW---TRLCE---   | 151        |       |      |            |
| OMS1_YEAST                                                                       | 66      | RK--QKTKE-E-LAKE--R---FEEQ-LRS-PNRFV-RWGAIAR-SEKFS  | 102        |       |      |            |
| GSTCD_HUMAN                                                                      | 152     | --LT---IPLA--IENFL-----RE--SSDQPPTIPVEILQ-LEKKLS    | 184        |       |      |            |
| OMS1_YEAST                                                                       | 103     | KGMTKYMIG-AYVI--FLIYGLFFTKKLFADK-----E-LERLLKK-Q    | 141        |       |      |            |
| GSTCD_HUMAN                                                                      | 185     | EPVRVHND-DKLR-RQKLK-Q-QKADGVGPPPLTK-GKAKSKVHTQETSEG | 229        |       |      |            |
| OMS1_YEAST                                                                       | 142     | EEGNA-NEYEALRIKE-LGKGLRRRD---EL-KLEEYK-KM--QE--EG   | 179        |       |      |            |
| GSTCD_HUMAN                                                                      | 230     | LDSSKSLELKVA-F--SKLTVQEE--PA--TTN--REPSHIRKA----K   | 266        |       |      |            |
| OMS1_YEAST                                                                       | 180     | IENFD---DIRVQNFQNKL--NEQILPARDTTNFYQE----KANEYDK    | 219        |       |      |            |
| GSTCD_HUMAN                                                                      | 267     | ASDLPPLEHV-FAEG-----L--YFTLADIVL-LPC-----IHHFLVIIS  | 302        |       |      |            |
| OMS1_YEAST                                                                       | 220     | AINME--ERVIFL-GKRRKWLKMKH-CQGD-VLEVSCGTGRNI-KYL-DMS | 262        |       |      |            |
| GSTCD_HUMAN                                                                      | 303     | R----KF---SEKLVFPLASWYQRIQE-VPGVKTAASKCGIQFLHLPK    | 344        |       |      |            |
| OMS1_YEAST                                                                       | 263     | RINSITFLDSSSENME---I-T-HKKFREKFP--K--YKK--VAFV-VGK  | 300        |       |      |            |
| GSTCD_HUMAN                                                                      | 345     | LLTTSTEQHPNLCVPGVEEQSDPLFIGGPRPTMAKLMKKGIE--VMFSP   | 392        |       |      |            |
| OMS1_YEAST                                                                       | 301     | -----AE--NL--V-DLAEK-----G-KPSLEN--EK--ENQVKYD-     | 326        |       |      |            |
| GSTCD_HUMAN                                                                      | 393     | HPCPTWTLDWNVLPAAVSPKEGKM-S-SDRALRKQQQLNLLVYVVTNQ-A  | 439        |       |      |            |
| OMS1_YEAST                                                                       | 327     | -----TI---V--EAF---G-LCSHED-PV-K--ALNN--F---GKLL    | 351        |       |      |            |
| GSTCD_HUMAN                                                                      | 440     | KPGDRIVDFCSGGGHVIVLAH-MLPSCQVTLIENKELSL-IRAKKRSDE   | 487        |       |      |            |

|                                                                                  |         |                                                      |             |      |       |             |
|----------------------------------------------------------------------------------|---------|------------------------------------------------------|-------------|------|-------|-------------|
| OMS1_YEAST                                                                       | 352     | KP-----D-----GRI-ILLEHGR--G-QYDFI-NK-I-LDNRAERR---   | 381         |      |       |             |
| GSTCD_HUMAN                                                                      | 488     | LGLSNIWFIQANMEYFTG-MFNIGVALHACG-VA--TDM-VIEHCIKTRA   | 532         |      |       |             |
| OMS1_YEAST                                                                       | 382     | --L-NTW-----GCRWNLD--L---GEVLDSDLELVEE--K-R-         | 409         |      |       |             |
| GSTCD_HUMAN                                                                      | 533     | SFV-TCPCCYGFIQNTSKFNFPKSE-QFKK-TLSYKEHMILCRFADQTAV   | 579         |      |       |             |
| OMS1_YEAST                                                                       | 410     | THLGT-TWC---I--VAK-R--KGDVK-KKDELGFVE----KYL-QSSI    | 443         |      |       |             |
| GSTCD_HUMAN                                                                      | 580     | QLPPQRRLL--IGKQCMLVDLDRARAAEECGYSVQVISMPEPESCSPP--KN | 625         |      |       |             |
| OMS1_YEAST                                                                       | 444     | ----RKRMESEFEKK-----D-DMA-SKKE-----LEP--VPPVSKS      | 471         |      |       |             |
| -----                                                                            |         |                                                      |             |      |       |             |
| Name 1: HXD4_HUMAN                                                               |         |                                                      |             |      |       |             |
| Name 2: LIN39_CAEEL                                                              |         |                                                      |             |      |       |             |
| Homeobox protein Hox-D4 OS=Homo sapiens GN=HOXD4 PE=2 SV=3                       |         |                                                      |             |      |       |             |
| Homeobox protein lin-39 OS=Caenorhabditis elegans GN=lin-39 PE=2 SV=1            |         |                                                      |             |      |       |             |
| Needed for following interaction(s):                                             |         |                                                      |             |      |       |             |
| worm                                                                             | genetic | RASK_HUMAN                                           | HXD4_HUMAN  | KRAS | HOXD4 | LET60_CAEEL |
| LIN39_CAEEL                                                                      |         |                                                      |             |      |       |             |
| Length sequence 1: 255                                                           |         |                                                      |             |      |       |             |
| Length sequence 2: 253                                                           |         |                                                      |             |      |       |             |
| Sequence #1: HXD4_HUMAN                                                          |         |                                                      |             |      |       |             |
| Sequence #2: LIN39_CAEEL                                                         |         |                                                      |             |      |       |             |
| Length #1: 254                                                                   |         |                                                      |             |      |       |             |
| Length #2: 254                                                                   |         |                                                      |             |      |       |             |
| Matrix: BLOSUM62                                                                 |         |                                                      |             |      |       |             |
| Gap open: 2.0                                                                    |         |                                                      |             |      |       |             |
| Gap extend: 1.0                                                                  |         |                                                      |             |      |       |             |
| Length: 254                                                                      |         |                                                      |             |      |       |             |
| Identity: 98/254 (38.58%)                                                        |         |                                                      |             |      |       |             |
| Similarity: 119/254 (46.85%)                                                     |         |                                                      |             |      |       |             |
| Gaps: 60/254 (23.62%)                                                            |         |                                                      |             |      |       |             |
| Score: 404.00                                                                    |         |                                                      |             |      |       |             |
| HXD4_HUMAN                                                                       | 1       | MVMS-SYMVNSKYVD-PK-FPPCEEYLQGGYLGEQGADYGG-GAQG---    | 43          |      |       |             |
| LIN39_CAEEL                                                                      | 1       | MTTSTS--PSS--TDAPRATAP-ES-SSSSSSSSSSSSTSSVSGASGIPS   | 44          |      |       |             |
| HXD4_HUMAN                                                                       | 44      | -ADFQPP-GLY-P-RPD--FGEQPFQGS--GPGPGS--A--LPARGHQE    | 81          |      |       |             |
| LIN39_CAEEL                                                                      | 45      | SSELSSSTIG-YDPMTASAALSAH-F-GSYDPTSSSQIASYF-ASSOGL-   | 89          |      |       |             |
| HXD4_HUMAN                                                                       | 82      | PGGPGGHYAAP--GEP--C--PAPPAP-PP-APLPGARAYSQSDPKQPPS   | 123         |      |       |             |
| LIN39_CAEEL                                                                      | 90      | -GGP--QY--PILGDQSLCYNPVSVTSTHHDWKHLEGDDDDKDDKKGIS    | 134         |      |       |             |
| HXD4_HUMAN                                                                       | 124     | G--TAL-KQP--AVVYPWMKKVHVNSVNPNTYGT---GEPKRSRTAYTRQQ  | 165         |      |       |             |
| LIN39_CAEEL                                                                      | 135     | GDDDDMDKNSGGA-VYPWMTRVH--ST---TGGSRGE-KRQRTAYTRNQ    | 176         |      |       |             |
| HXD4_HUMAN                                                                       | 166     | VLELEKEFHFNRYLTRRRRIEIAHTLCLSERQIKIWFQNRMMKWKDHK-    | 214         |      |       |             |
| LIN39_CAEEL                                                                      | 177     | VLELEKEFHTHKYLTRKRRIEVAHSLMLTERQVQIWFQNRMMKHKENKD    | 226         |      |       |             |
| HXD4_HUMAN                                                                       | 215     | LPNT                                                 | 218         |      |       |             |
| LIN39_CAEEL                                                                      | 227     | KPMT                                                 | 230         |      |       |             |
| -----                                                                            |         |                                                      |             |      |       |             |
| Name 1: RAD52_HUMAN                                                              |         |                                                      |             |      |       |             |
| Name 2: RAD52_YEAST                                                              |         |                                                      |             |      |       |             |
| DNA repair protein RAD52 homolog OS=Homo sapiens GN=RAD52 PE=1 SV=1              |         |                                                      |             |      |       |             |
| DNA repair and recombination protein RAD52 OS=Saccharomyces cerevisiae (strain A |         |                                                      |             |      |       |             |
| TCC 204508 / S288c) GN=RAD52 PE=1 SV=2                                           |         |                                                      |             |      |       |             |
| Needed for following interaction(s):                                             |         |                                                      |             |      |       |             |
| yeast                                                                            | genetic | BLM_HUMAN                                            | RAD52_HUMAN | BLM  | RAD52 | SGS1_YEAST  |

RAD52\_YEAST

Length sequence 1: 418  
 Length sequence 2: 471  
 Sequence #1: RAD52\_HUMAN  
 Sequence #2: RAD52\_YEAST  
 Length #1: 540  
 Length #2: 540  
 Matrix: BLOSUM62  
 Gap open: 2.0  
 Gap extend: 1.0  
 Length: 540  
 Identity: 179/540 (33.15%)  
 Similarity: 256/540 (47.41%)  
 Gaps: 191/540 (35.37%)  
 Score: 704.00

```

RAD52_HUMAN      1 MSGTEEAILGGRD-SHPAAGGGSVLCFGQCQYTAEEYQAIQ-KALRQLRG      48
RAD52_YEAST      1 MN---E-IM-DMDEKKP-----V-FG--NH-SED---IQTK-LDKKLG      30
RAD52_HUMAN     49 PEYISSRMAG-GGQKVCYIEGHRVINLANEMFGYNGWAHSITQ-QNV--D      94
RAD52_YEAST     31 PEYISKRV-GFGTSRIAYIEGWRVINLANQIFGYNGW--S-TEVKSVVID      76
RAD52_HUMAN     95 FVDLNNKFYVGVG-AFVVRVQLKDGSHYEDVGYG-V-SEGLKSK-ALSLE     140
RAD52_YEAST     77 FLDERQKGFSG-CTAIVRVTLTSGTYREDIGYGTVENE--RRKPA-AFE     122
RAD52_HUMAN    141 KARKEAVTDGLKRALRSFGNALGNCILDKDYLRSLNKL----P----RQL     182
RAD52_YEAST    123 RAKSAVTDALKRSLRFGNALGNCLYDKDFLAKIDKVKFDPDPDFDENNL     172
RAD52_HUMAN    183 --PLEVDLTKAKRQD-L-EPSVEEARYNSCRPNMALGHPQLQQV--TSP-     225
RAD52_YEAST    173 FRPTD-EISESSRTNLTLE-NQEQQQY----PNK--RRQLTKVTNTNPD     213
RAD52_HUMAN    226 -----SR--PSHAVIPADQDCSSRSLSSS--A-VES-EATHQ-         256
RAD52_YEAST    214 STKNLVKIENTVSRGTPMMAA-PA--EANSKN-SSNKDSDLKSLDASKQD     259
RAD52_HUMAN    257 R-KLRQKQL--QQQFRE---RM-----EKQQVRV---S-T-----     281
RAD52_YEAST    260 QDDLDDSLMFSDDFQDDDLINMGNNTNSVLTTEKDPV-VAKQSPTASSN     308
RAD52_HUMAN    282 PSAE-----K--S-----EAA--P--PAPPVTHSTPV--TVSE         306
RAD52_YEAST    309 PEAEQITFVTAKAATSQVQNERIYIGEEISIFDFPKYQAQSIKIRH-T-VDTQTSK 356
RAD52_HUMAN    307 --P--LL-EK-----D-----FLA--GVTQELIKTLEDNSEKAVVTP--     336
RAD52_YEAST    357 HIPASVLKDKTMTTARDSVYEKF-APKG--KQL--SMK--NNDK-ELGPHM     399
RAD52_HUMAN    337 -D-AGDGVVKKPSSR-ADPAQTSDTLALNNQMVTQNR-TPHS-VCHQKPKQA     381
RAD52_YEAST    400 LEGAGNQV--P--RETTPIKTNAT-AP--PAAAAPRFAPPKVVH--PNG     440
RAD52_HUMAN    382 KSGSWDLQTYSA--DQRTTGNWESHK-KSQDMKKRKYDPS      418
RAD52_YEAST    441 -NGA--V---PAVPQQRSTRR-EVGRPKINPLHARK--PT      471
  
```

-----  
 Name 1: IF4A1\_HUMAN  
 Name 2: IF4A\_YEAST

Eukaryotic initiation factor 4A-I OS=Homo sapiens GN=EIF4A1 PE=1 SV=1  
 ATP-dependent RNA helicase eIF4A OS=Saccharomyces cerevisiae (strain ATCC 204508 / S288c) GN=TIF1 PE=1 SV=3

Needed for following interaction(s):  
 yeast genetic PTEN\_HUMAN IF4A1\_HUMAN PTEN EIF4A1 TEPl\_YEAST  
 IF4A\_YEAST

Length sequence 1: 406

Length sequence 2: 395  
 Sequence #1: IF4A1\_HUMAN  
 Sequence #2: IF4A\_YEAST  
 Length #1: 408  
 Length #2: 408  
 Matrix: BLOSUM62  
 Gap open: 2.0  
 Gap extend: 1.0  
 Length: 408  
 Identity: 269/408 (65.93%)  
 Similarity: 331/408 (81.13%)  
 Gaps: 25/408 (6.13%)  
 Score: 1369.00

```

IF4A1_HUMAN      9 SRDNG-PDGMEPEGVIESNWEIVDSFDDMNLSESLLRGIYAYGFEEKPSA     57
IF4A_YEAST      2 S-E-GITD-IE-ESQIQTNVDKVVYKFFDDMELDENLLRVGFVGFEEPSA     47
IF4A1_HUMAN     58 IQQRAILPCIKGYDVIAQAQSGTGKTTATFAISILQQLIQLDLKATQALVLA     107
IF4A_YEAST     48 IQQRAIMPIIEGHDVLAQAQSGTGKTFGFSIAALQRIDTSVKAPQALMLA     97
IF4A1_HUMAN    108 PTRELAQQIQKVVVMALGDYMGASCHACIGGTN-VR-AEVQKLQMEAPHII     155
IF4A_YEAST     98 PTRELALQIQKVVVMALAFHMDIKVHACIGGTSFVEDAE--GLR-DA-QIV     143
IF4A1_HUMAN    156 VGTPGRVFDMLN---RRYLSPKYIKMFVLDEADEMLSRGFKDQIYDIFQK     202
IF4A_YEAST    144 VGTPGRVFD---NIQRRRFRFTDK-IKMPILDEADEMLSSGFKEQIYQIFTL     190
IF4A1_HUMAN    203 LNSNTQVVLLSATMPSDVLEVTKKFMRPDIRILVKKEELTLEGIRQFYIN     252
IF4A_YEAST    191 LPPTTQVVLLSATMPNDVLEVTKFMRNPVRLVKKDELTLLEGIKQFYVN     240
IF4A1_HUMAN    253 VEREEWKDLTLC--DLYETLTIQAVIFINTRRQVDWLTEKMHAR-D-FT     298
IF4A_YEAST    241 VEEEEYKYE--CLTDLYDSISVTVQAVIFCNTRRQVEELTKL--RNDKFT     286
IF4A1_HUMAN    299 VSAMHGDMQKQKRDVIMREFRSGSSRVLITDILLARGIDVQQVSLVINYD     348
IF4A_YEAST    287 VSAIYSDLPQQQERDTIMKEFRSGSSRILISTDILLARGIDVQQVSLVINYD     336
IF4A1_HUMAN    349 LPTNRENYIHRIGRGRFGRKGVAINMVTEEDKRTLRDIETFYNTSIEEM     398
IF4A_YEAST    337 LPANKENYIHRIGRGRFGRKGVAINFVNTEDVGMARELEKIFYSTQIEEL     386
IF4A1_HUMAN    399 PLNVADLI      406
IF4A_YEAST    387 PSDIATLL      394
  
```

-----  
 Name 1: FBX18\_HUMAN  
 Name 2: SRS2\_YEAST

F-box only protein 18 OS=Homo sapiens GN=FBX018 PE=1 SV=2  
 ATP-dependent DNA helicase SRS2 OS=Saccharomyces cerevisiae (strain ATCC 204508 / S288c) GN=SRS2 PE=1 SV=2

Needed for following interaction(s):  
 yeast genetic BLM\_HUMAN FBX18\_HUMAN BLM FBX018 SGS1\_YEAST  
 SRS2\_YEAST  
 yeast physical BLM\_HUMAN FBX18\_HUMAN BLM FBX018 SGS1\_YEA  
 ST SRS2\_YEAST

Length sequence 1: 1043  
 Length sequence 2: 1174  
 Sequence #1: FBX18\_HUMAN  
 Sequence #2: SRS2\_YEAST  
 Length #1: 1356  
 Length #2: 1356  
 Matrix: BLOSUM62  
 Gap open: 2.0  
 Gap extend: 1.0  
 Length: 1356

Identity: 348/1356 (25.66%)  
Similarity: 510/1356 (37.61%)  
Gaps: 619/1356 (45.65%)  
Score: 967.00

|             |     |                                                     |     |
|-------------|-----|-----------------------------------------------------|-----|
| FBX18_HUMAN | 75  | MAKSNS-----VGO-DSCQDSEGMIFPAESSCALPQEGSAGPGSPGSA    | 117 |
| SRS2_YEAST  | 1   | MS-SNNDLWLHLVLSQLNT-Q-QRAALF--DYTRGL-QV-IAGPGT-G--  | 40  |
| FBX18_HUMAN | 118 | PPSRKRSWSSEESNQATGTRSRWDGVSKKAPRHLSVP----CTR-PREA   | 162 |
| SRS2_YEAST  | 41  | ----K-----TKVL-TSR--VAYLILHHIHP-PRDIIVTFTFNKA       | 72  |
| FBX18_HUMAN | 163 | RQEAEDSTSRLSAE--SGETDQDAGDVGPDPIPDYSYGLGLTLPQEQALS  | 210 |
| SRS2_YEAST  | 73  | ANEMKE--RLQ-EMLRG-----AG-V--N-I--SEL-LIGTF-----     | 99  |
| FBX18_HUMAN | 211 | H-ICSLPSEVL-RHVFAFLPVEDLYWNLSLVCHLWREIISDPLFIPWKKL  | 258 |
| SRS2_YEAST  | 100 | HSIC-L--KILYR--FGHL-V-DL--QKD-----WR-II-D-----EK-   | 126 |
| FBX18_HUMAN | 259 | YHRYLMNEEQAVSKVDGILSNCGIEKESDLCVNLIR-YTAT-T-K---C   | 302 |
| SRS2_YEAST  | 127 | -----E-----IDVILDDM-IEKVPD---Q-IRDYASSITRKVNLC      | 157 |
| FBX18_HUMAN | 303 | SPSV--DPERVLWLSLRDHP-----L-----LPEAEACV-RQHLPLD     | 335 |
| SRS2_YEAST  | 158 | MPSKNGD-E---WTI--HPKLIKQISKLSNAIILPE-EYILDSNH--D-   | 197 |
| FBX18_HUMAN | 336 | YAAAGGVNIWALVAAVVLLSSSVN--DIQRLL--F-CL-R-RPSSTV--   | 375 |
| SRS2_YEAST  | 198 | -AALG--YFYQIQYQSE--LSKK-NTLDFDLDLMTFRLLTRVRVLSNIKH  | 241 |
| FBX18_HUMAN | 376 | TMPD-VTET--LYCIAVL-LYAMREKGIN--ISNR---I----HYNIF-Y  | 411 |
| SRS2_YEAST  | 242 | VLVDEFQDTNGIQ-LDLMFLFA--KG-NHHLS-RGMTTVGDDPQSYAF    | 285 |
| FBX18_HUMAN | 412 | --CL--YLQE--NSC-TQ-AT--KVKEE-PSVWPGKKTIIQL-THE----  | 444 |
| SRS2_YEAST  | 286 | RNALAHNFL-EMGRKCPIEYSTIILV-ENYRS---SQK-I-LNTSEILIT  | 328 |
| FBX18_HUMAN | 445 | QQLILNHK-ME---PL-Q-V---VKIM---A-F--AGTGTSTLVK-      | 475 |
| SRS2_YEAST  | 329 | QQ---N-KGRQNRAPLRAQFDLDFPPV-YMNFPAFYLEA---PS-LVRE   | 368 |
| FBX18_HUMAN | 476 | --YAEKWSQSRFLYVTFNK-SI----AKQAERVPSPNVICKTFHSMAY--  | 516 |
| SRS2_YEAST  | 369 | LLYL-K-ALPN-LF-TFNDFAILVRQRRIKRI-ESALT-E--HRIPYKI   | 410 |
| FBX18_HUMAN | 517 | --GHIGRKY-QSKK-K--LNLFKL--TP-----FMVNSVL--AEGKG---  | 548 |
| SRS2_YEAST  | 411 | IRGH---SFWDSKETRAMLNLLKLFSPNDKHAILA-SLLYPARGLGPAT   | 456 |
| FBX18_HUMAN | 549 | G-FIR-A--KL--V-C-KTLENFFASADEELTIDHVPWIWCKNSQQQR-V  | 588 |
| SRS2_YEAST  | 457 | GEKIKNALDTLATDVSCFQILKDI--SS-KKIMLD-IP--TK--G-RSV   | 496 |
| FBX18_HUMAN | 589 | -----MVE-----QSEKLVNGV-----L-EAS--R--LW-DNMRK--     | 611 |
| SRS2_YEAST  | 497 | IADFISMIENCQLLLQSTLLGGLSDFDKLYELSGLYEYLYDKGKKND     | 546 |
| FBX18_HUMAN | 612 | -LGECTE----EA-H---QMTHDGY-LKLWLQSKPSLASFD-----AI--  | 644 |
| SRS2_YEAST  | 547 | QL-EKSEPNLLNARKHKNIELLKN-YFLAL--LSK-SESS-DKEKNEAIKA | 590 |
| FBX18_HUMAN | 645 | FVDEAQDCTPAIMNIVLSQPQCGK--I---F---V-GD--PHQQIYTRFG  | 682 |
| SRS2_YEAST  | 591 | ATDEAE---P-IENKVIT-P--KEYLRNFFNSLSLHSDAAEEEEESENKD  | 633 |
| FBX18_HUMAN | 683 | A-V---NALF-TVPHT-HVIFYLTQSFRRGVE--IAYV-GAT--ILDVCK  | 720 |
| SRS2_YEAST  | 634 | AKIKREKNG-FVTI-STIH-----GAK-GLEWVVFIPGCEEIIP-C-     | 672 |
| FBX18_HUMAN | 721 | RV-R--KK--TLVGGNH-QSGIRGDA--KGQVALLSRTNANVFDE-----  | 757 |

|                                                                                                                         |            |                                                     |             |       |        |          |
|-------------------------------------------------------------------------------------------------------------------------|------------|-----------------------------------------------------|-------------|-------|--------|----------|
| SRS2_YEAST                                                                                                              | 673        | -VFNDDKKDESEDEEEDQENSKKASPK-KTRVLS-VEDSI-DEERRMF    | 718         |       |        |          |
| FBX18_HUMAN                                                                                                             | 758        | --A-VR-----VT-EG-EFP---SRIHL---IGGIKSFGLD--RI       | 784         |       |        |          |
| SRS2_YEAST                                                                                                              | 719        | FVAQTRAKYLLYLSNVTVTVEDVDRPRIASRF-LTTDL--IKAMS-DSQKL | 764         |       |        |          |
| FBX18_HUMAN                                                                                                             | 785        | ID---I---W-IL-LQP--EEERRKQ-NL-VI-KD--KFI--RR---W    | 812         |       |        |          |
| SRS2_YEAST                                                                                                              | 765        | FESTNSIKKLYRILNKKPPAEDD--KLFSLDQLRKDYNQFIENRRERMIW  | 812         |       |        |          |
| FBX18_HUMAN                                                                                                             | 813        | --VH-KE--G--FS-----G-FKRYVTAEDK-ELEAK--I---AVVEK    | 842         |       |        |          |
| SRS2_YEAST                                                                                                              | 813        | QGIQMNDVYGIQLSRNKLGSVSDF-TSAADQLRLETQNSIFPQKKLIEK   | 861         |       |        |          |
| FBX18_HUMAN                                                                                                             | 843        | -----Y--NIRI--PELVQRI--E--KCH--I-EDLDFA-EYILGT      | 871         |       |        |          |
| SRS2_YEAST                                                                                                              | 862        | SRPSKINGNYAPKSRVKSP--KRYAPETTSFHSPTKKKV-YAPQYV-ST   | 907         |       |        |          |
| FBX18_HUMAN                                                                                                             | 872        | --V-----HKA--KGLEF---D-TVHVLDDFVKVP--CARHNLP-QLP    | 903         |       |        |          |
| SRS2_YEAST                                                                                                              | 908        | TNVPSRQEFHSSTGKNIPFLRREDRSI---TD-IS-PRSSSTR-SLKGASP | 951         |       |        |          |
| FBX18_HUMAN                                                                                                             | 904        | HFRVES-FSEDEWNLLYVAVTRAK-KRLIMTKSLENI--LTLAGEYFLQA  | 949         |       |        |          |
| SRS2_YEAST                                                                                                              | 952        | N-KT-SHMSDD---LMRPSPTR-KDK--V-TR---NIHFAT-AGT-F-RI  | 986         |       |        |          |
| FBX18_HUMAN                                                                                                             | 950        | ELT-SNV--L-----K-----T-----GVVRCVVG--Q-----CNN      | 970         |       |        |          |
| SRS2_YEAST                                                                                                              | 987        | E-TQSNVDELHPPEYSNKSQSLTSSEFSGFSACSNSDQPTNLIEDINN    | 1035        |       |        |          |
| FBX18_HUMAN                                                                                                             | 971        | AIPV-----D-TV-----L---TMKKL-PITYSNRKENKGGYLCHS      | 1001        |       |        |          |
| SRS2_YEAST                                                                                                              | 1036       | ELDLSDEELLNDISIERRELLGSKKT-KKIKPKT-RNRKSKRGDKV--K   | 1081        |       |        |          |
| FBX18_HUMAN                                                                                                             | 1002       | CAEQRIGPL-A-F-----LTA-----SPEQVRAMERTVEN--IVLPRH    | 1035        |       |        |          |
| SRS2_YEAST                                                                                                              | 1082       | -VEEVI-DLKSEFEEDDSRNTTAAELHNPD-----DTTVDNRPPII---S  | 1121        |       |        |          |
| FBX18_HUMAN                                                                                                             | 1036       | EALLFL 1041                                         |             |       |        |          |
| SRS2_YEAST                                                                                                              | 1122       | NA-KFL 1126                                         |             |       |        |          |
| -----                                                                                                                   |            |                                                     |             |       |        |          |
| Name 1: IF4E3_HUMAN                                                                                                     |            |                                                     |             |       |        |          |
| Name 2: IF4E_YEAST                                                                                                      |            |                                                     |             |       |        |          |
| Eukaryotic translation initiation factor 4E type 3 OS=Homo sapiens GN=EIF4E3 PE=2 SV=4                                  |            |                                                     |             |       |        |          |
| Eukaryotic translation initiation factor 4E OS=Saccharomyces cerevisiae (strain ATCC 204508 / S288c) GN=CDC33 PE=1 SV=1 |            |                                                     |             |       |        |          |
| Needed for following interaction(s):                                                                                    |            |                                                     |             |       |        |          |
| yeast                                                                                                                   | physical   | MUS81_HUMAN                                         | IF4E3_HUMAN | MUS81 | EIF4E3 | MUS81_YE |
| AST                                                                                                                     | IF4E_YEAST |                                                     |             |       |        |          |
| Length sequence 1: 224                                                                                                  |            |                                                     |             |       |        |          |
| Length sequence 2: 213                                                                                                  |            |                                                     |             |       |        |          |
| Sequence #1: IF4E3_HUMAN                                                                                                |            |                                                     |             |       |        |          |
| Sequence #2: IF4E_YEAST                                                                                                 |            |                                                     |             |       |        |          |
| Length #1: 226                                                                                                          |            |                                                     |             |       |        |          |
| Length #2: 226                                                                                                          |            |                                                     |             |       |        |          |
| Matrix: BLOSUM62                                                                                                        |            |                                                     |             |       |        |          |
| Gap open: 2.0                                                                                                           |            |                                                     |             |       |        |          |
| Gap extend: 1.0                                                                                                         |            |                                                     |             |       |        |          |
| Length: 226                                                                                                             |            |                                                     |             |       |        |          |
| Identity: 78/226 (34.51%)                                                                                               |            |                                                     |             |       |        |          |
| Similarity: 114/226 (50.44%)                                                                                            |            |                                                     |             |       |        |          |
| Gaps: 67/226 (29.65%)                                                                                                   |            |                                                     |             |       |        |          |
| Score: 354.00                                                                                                           |            |                                                     |             |       |        |          |
| IF4E3_HUMAN                                                                                                             | 26         | AAPEPPLGLQLLSA-LQPEPGGV--PLHSSWTFWLDRLSLPGAT-AAECA- | 70          |       |        |          |
| IF4E_YEAST                                                                                                              | 21         | ATPK-TV-LSD-SAHF--D---VKHPLNTKWTLYWTK--P-AVDKSE-SW  | 58          |       |        |          |

|             |     |                                                    |     |
|-------------|-----|----------------------------------------------------|-----|
| IF4E3_HUMAN | 71  | SN-LKKIYT-VQTQVIFWSVYNNIP-PVTSPLRCS-YHLMRGERRPLWE  | 116 |
| IF4E_YEAST  | 59  | SDLLRPV-TSFQTVVEFWAIQNIPEP-HELPLK-SDYHVRNDRVPEWE   | 105 |
| IF4E3_HUMAN | 117 | EESNAKGGVW--KMKVPK--DSTSTVVKEL--LLATIGEQT-DCAAADD  | 159 |
| IF4E_YEAST  | 106 | DEANAKGKWSFQLR-GKGAD-IDELW--LRTLAVIGE--TID---EDD   | 146 |
| IF4E3_HUMAN | 160 | -EVIGVSV-SVRDR-EDVVQVW--NVNAS--L-V-GE-ATVLEKIYELLP | 199 |
| IF4E_YEAST  | 147 | SQINGV-VLSIR-KGNGKALWTKSEDKPELLRIGGKFKQVL-KLTD--D  | 191 |
| IF4E3_HUMAN | 200 | -HITFKAVFYKPHHEEHAFEGGRGKH                         | 224 |
| IF4E_YEAST  | 192 | GHLEF---F--PHSS--A--NGR--H                         | 206 |

Name 1: CLK2\_HUMAN  
Name 2: KNS1\_YEAST

Dual specificity protein kinase CLK2 OS=Homo sapiens GN=CLK2 PE=1 SV=1  
Dual specificity protein kinase KNS1 OS=Saccharomyces cerevisiae (strain ATCC 204508 / S288c) GN=KNS1 PE=1 SV=2

Needed for following interaction(s):  
yeast genetic RASK\_HUMAN CLK2\_HUMAN KRAS CLK2 IRA2\_YEAST  
KNS1\_YEAST

Length sequence 1: 499  
Length sequence 2: 737  
Sequence #1: CLK2\_HUMAN  
Sequence #2: KNS1\_YEAST  
Length #1: 695  
Length #2: 695  
Matrix: BLOSUM62  
Gap open: 2.0  
Gap extend: 1.0  
Length: 695  
Identity: 208/695 (29.93%)  
Similarity: 322/695 (46.33%)  
Gaps: 237/695 (34.10%)  
Score: 874.00

|            |     |                                                     |     |
|------------|-----|-----------------------------------------------------|-----|
| CLK2_HUMAN | 2   | P-HPRRY-H-----SS-----E-R--GS--RGSYREHYRSR--KH---    | 27  |
| KNS1_YEAST | 75  | PLRPRQHQQHQLFLDNENAIELDEEPRINTTINNS--NNHNSRVEDAD    | 123 |
| CLK2_HUMAN | 28  | -----KRR--R-SRS-----WSSSS---DR--TRRR-----RREDS-Y    | 51  |
| KNS1_YEAST | 124 | DIIFIKEQPIQFS-SPLILP-SSSSINNINNIVTSNPNPGCGTAATSNSTY | 171 |
| CLK2_HUMAN | 52  | HVRSRSSY-DDRS-S-DRRV-YDRRYCGSYRRNDY-S-RDRGDAYY----  | 91  |
| KNS1_YEAST | 172 | -ITTPKFKFKQRTISLP-QLPLSK--L-SYQSN-YFNVPDQNTNAIVPRVT | 215 |
| CLK2_HUMAN | 92  | DTDYR--H---S---YEYQRE-N---S-S-YRS---Q-RS---SRR      | 116 |
| KNS1_YEAST | 216 | QTENELLHLTGCAKTLGKNAVNLTIAHSTSPF-SNPPAQIASLPQSNL    | 264 |
| CLK2_HUMAN | 117 | KHRRRRRRS-RTF-SRSSSQH-SSRAKS-VEDDAEGHLIYHVGDWL--Q   | 160 |
| KNS1_YEAST | 265 | K--KQIGSSLRKFTSNGSSESASSN--KSNFKTDKDGHYVYQEND-IFGS  | 309 |
| CLK2_HUMAN | 161 | -ERYEIV-STLGEFTFGRVQCVDRH-RGGARVALKIKNVEKYKEAARL    | 207 |
| KNS1_YEAST | 310 | GGRF-VVKDLLGQGTGFKVLKCIDNKYEPN-YVAVKIVRAVDYREAAKT   | 357 |
| CLK2_HUMAN | 208 | EINVLEKI-NEKDPDNK-NLCVQMF-DWFVDYGHMC-ISFELLGLSTFDF  | 253 |
| KNS1_YEAST | 358 | ELRILQTLN-NDPQGFQ-CL-LLRECFDYKNHICLVT-DLYGRSIYDF    | 403 |
| CLK2_HUMAN | 254 | LKDNNYLP-YP-IHQVRHMAFQLCQAVKFLHD-NKLTHTDLKPENILFVN  | 300 |

|            |     |                                                     |     |
|------------|-----|-----------------------------------------------------|-----|
| KNS1_YEAST | 404 | MCSNG-IARFPGSH-IQAIARQLIRSVCFHLHDLG-IIHTDLKPENIL-I- | 448 |
| CLK2_HUMAN | 301 | SD--Y--E---L-T-YNLEKKRDE----RSV-KSTAVRVVDFGSATFDH   | 335 |
| KNS1_YEAST | 449 | CDETHIAQKLPKLTQVSLSKRRREASKGRKILKNPEIKIIDFGSAIF-H   | 497 |
| CLK2_HUMAN | 336 | -EHHSTIVSTRHYRAPEVILELQVSPQCDVWSIGCIIFEYVYVGTFLFQTH | 384 |
| KNS1_YEAST | 498 | YEYHPPVISTRHYRAPEIVLGLGWSFPDCDIWSIACVLVELVIGESLYPIH | 547 |
| CLK2_HUMAN | 385 | DNREHLAMMERILG-PIPS----RMIRKTR-K-----Q---KYFYR      | 416 |
| KNS1_YEAST | 548 | ENLEHMAMMQRINGTPFPPTDIIDKMFYKSKHKLGNSPSDLNSTVIKHFDR | 597 |
| CLK2_HUMAN | 417 | GR---LDWDE-N-----T--SAGRYVRENC-----KPLRR-Y---       | 441 |
| KNS1_YEAST | 598 | -KTLSQLQWPEKNKRGDITITEKSMKR-VLQSCDRLDIYSKVLKQDYGDS  | 645 |
| CLK2_HUMAN | 442 | LT-----SE-A---EEH-----HQL-----F-D                   | 454 |
| KNS1_YEAST | 646 | LSINWNLPPEKNWSLINSKLAWKRQTHSSSSSTTDELDKETFLFWYFID   | 695 |
| CLK2_HUMAN | 455 | LIESMLEYEPARKRLTGEALQHPFFARLRAEPPNKLWDSRD-IS        | 498 |
| KNS1_YEAST | 696 | LLRKMFEFDPKTRITAKDALDHEWF-NL-----GIL-D---DGIA       | 730 |

Name 1: PTPA\_HUMAN  
Name 2: PTPA1\_YEAST

Serine/threonine-protein phosphatase 2A activator OS=Homo sapiens GN=PPP2R4 PE=1 SV=3  
Serine/threonine-protein phosphatase 2A activator 1 OS=Saccharomyces cerevisiae (strain ATCC 204508 / S288c) GN=RRD1 PE=1 SV=1

Needed for following interaction(s):  
yeast genetic PTPA\_HUMAN BLM\_HUMAN PPP2R4 BLM PTPA1\_YEAST  
SGS1\_YEAST

Length sequence 1: 358  
Length sequence 2: 393  
Sequence #1: PTPA\_HUMAN  
Sequence #2: PTPA1\_YEAST  
Length #1: 373  
Length #2: 373  
Matrix: BLOSUM62  
Gap open: 2.0  
Gap extend: 1.0  
Length: 373  
Identity: 150/373 (40.21%)  
Similarity: 204/373 (54.69%)  
Gaps: 80/373 (21.45%)  
Score: 707.00

|             |     |                                                    |     |
|-------------|-----|----------------------------------------------------|-----|
| PTPA_HUMAN  | 12  | SSEEA--PPATQNFIIIPKKEIHTVPDMGKWKRSQAYADYIGFILTLNEG | 59  |
| PTPA1_YEAST | 2   | SLDRVDWPHAT--FSTPVKRIF---D-----TQTTLD---F-----Q--  | 30  |
| PTPA_HUMAN  | 60  | KGKLLTFEYRVSEMWNEVHEEKEQAQKQSVS-C-DECIPLPRAGHCAPSE | 107 |
| PTPA1_YEAST | 31  | --SSLAI-HRI-K-YH-LH--K-YTT--LISHCSD---PDP---H-ATAS | 62  |
| PTPA_HUMAN  | 108 | AIEKLV-ALLNLTDR---WIDETPPVDQPSRFGNKAYRTWYAKLDEEAEN | 153 |
| PTPA1_YEAST | 63  | SI-AMVNGLMGVLDKLAHLIDETPPLPGRPRYGNLACREWHHKLDERLPQ | 111 |
| PTPA_HUMAN  | 154 | -LVATVVPST--HLAAAVPEVAVYLKESVGNSTRIDYGTGHEAAFAFLCC | 200 |
| PTPA1_YEAST | 112 | WL-QEMLPSEYH--EVPPELQYYLGNFSGRSRLDYGTGHELSFMATVAA  | 158 |
| PTPA_HUMAN  | 201 | LCKIGV---LR-VDDQIAIVFKVFNRYLEVMRKLOKTYRMEPAGSQGVWG | 246 |
| PTPA1_YEAST | 159 | LDMLGMFPHMRGAD-----VFLLFNKYYTIMRRLILTYTLEPAGSHGVWG | 203 |



|                                                                                  |                   |                                                      |                     |
|----------------------------------------------------------------------------------|-------------------|------------------------------------------------------|---------------------|
| PTPA_HUMAN                                                                       | 247               | LDD-FQFLPFIWSS--QLID-H-PYLEPRHFVDEKA-VNENHKDYMFLE    | 290                 |
| PTPA1_YEAST                                                                      | 204               | LDDHFH-LVYILGSSQQLLDAQAP-LQPREILD-KSLVRE-YKDTNIFY-   | 248                 |
| PTPA_HUMAN                                                                       | 291               | C--ILFITEMKTGPFPAEHSNQLWNIS-AVPSWSKVNQGLIRMYKAECKLEK | 337                 |
| PTPA1_YEAST                                                                      | 249               | CQGINFINEVKMGPFEEHSPILYDIAVTVPRWSKVCKGLLKMYSVEVLKK   | 298                 |
| PTPA_HUMAN                                                                       | 338               | FPVIQHFKFGS--LLP-IHPVTSG                             | 358                 |
| PTPA1_YEAST                                                                      | 299               | FPVVQHFVFGTGFPPWVN-IQNG                              | 320                 |
| -----                                                                            |                   |                                                      |                     |
| Name 1: GEN_HUMAN                                                                |                   |                                                      |                     |
| Name 2: RAD2_YEAST                                                               |                   |                                                      |                     |
| Flap endonuclease GEN homolog 1 OS=Homo sapiens GN=GEN1 PE=1 SV=2                |                   |                                                      |                     |
| DNA repair protein RAD2 OS=Saccharomyces cerevisiae (strain ATCC 204508 / S288c) |                   |                                                      |                     |
| GN=RAD2 PE=1 SV=2                                                                |                   |                                                      |                     |
| Needed for following interaction(s):                                             |                   |                                                      |                     |
| yeast genetic                                                                    | BLM_HUMAN         | GEN_HUMAN                                            | BLM GEN1 SGS1_YEAST |
| RAD2_YEAST                                                                       |                   |                                                      |                     |
| Length sequence 1:                                                               | 908               |                                                      |                     |
| Length sequence 2:                                                               | 1031              |                                                      |                     |
| Sequence #1:                                                                     | GEN_HUMAN         |                                                      |                     |
| Sequence #2:                                                                     | RAD2_YEAST        |                                                      |                     |
| Length #1:                                                                       | 1204              |                                                      |                     |
| Length #2:                                                                       | 1204              |                                                      |                     |
| Matrix:                                                                          | BLOSUM62          |                                                      |                     |
| Gap open:                                                                        | 2.0               |                                                      |                     |
| Gap extend:                                                                      | 1.0               |                                                      |                     |
| Length:                                                                          | 1204              |                                                      |                     |
| Identity:                                                                        | 306/1204 (25.42%) |                                                      |                     |
| Similarity:                                                                      | 487/1204 (40.45%) |                                                      |                     |
| Gaps:                                                                            | 474/1204 (39.37%) |                                                      |                     |
| Score:                                                                           | 995.00            |                                                      |                     |
| GEN_HUMAN                                                                        | 1                 | MGVNDLWQILEPVKQHIPLR--NLGGKTIADVLSLWVCE-AQTVKMMGMS   | 47                  |
| RAD2_YEAST                                                                       | 1                 | MGVHSFWDIAGPTAR--PVRLESLEDKRMVAVDASIIWIYQFLKAVRDQEGN | 48                  |
| GEN_HUMAN                                                                        | 48                | VMK-PHLRNLFF-RISYLTQMDVKLVFVMEGEPKPKADVISKRNQSRYG    | 95                  |
| RAD2_YEAST                                                                       | 49                | AVKNSHITG-FFRRICKLLYFGIRPVFVFDGGVPLKRETIRQKERRQG     | 97                  |
| GEN_HUMAN                                                                        | 96                | --SSGKWSQK-----TGRSHFKSVLRECLHMLECLG---I--P---       | 127                 |
| RAD2_YEAST                                                                       | 98                | KRESAKSTARKLLALQLQNG-SN-DNV-K---NSTPSSGSSVQIFKQPDE   | 141                 |
| GEN_HUMAN                                                                        | 128               | W-V-QAAG---EAE-A-M-C--AY--L-NA-GGHVDGCLTN-DGDT----   | 158                 |
| RAD2_YEAST                                                                       | 142               | WDLDPDIPGFKYDKEDARVNSNKTFEKLMNSING--DG-LEDIDLDTINPA  | 188                 |
| GEN_HUMAN                                                                        | 159               | ---F--LYGAQTVY-----R--NFTMN-TKD-----PH-VDCYT---      | 183                 |
| RAD2_YEAST                                                                       | 189               | SAEFEELPKA-TQYLILSSRLRLKSRMRGYSKEQLETIFPNSMD-FSRFQ   | 236                 |
| GEN_HUMAN                                                                        | 184               | MSSIK-----SKL----GLDRDALVG---L--AIL--L-G--C-DY-LP    | 211                 |
| RAD2_YEAST                                                                       | 237               | IDMVKRRNFFTQKLINTTGF-QDG--GASKLNEEVINRISGQKSKEYKLT   | 283                 |
| GEN_HUMAN                                                                        | 212               | K--G-VPGVG-KE--QALKLIQIL--K--GQSLLQRF--N-----RW      | 241                 |
| RAD2_YEAST                                                                       | 284               | KTNNGWILGLGANDGSDAQKAI-VIDDKDAG-ALVKQLDSNAEDGDVLRW   | 331                 |
| GEN_HUMAN                                                                        | 242               | NETSCNSPQL-LVTKKLAHCSVCSH-PGSPKDHHER-NGCRLCKS-DKYC   | 287                 |
| RAD2_YEAST                                                                       | 332               | DDLEDNS---LKIV--R--HES--SNATTAPQ--KRSN--R--SEDBGC    | 365                 |
| GEN_HUMAN                                                                        | 288               | EPHDYEYCCPEWHRTEHDRQLSEVE--NNIK--K----KACCEGFPF      | 328                 |
| RAD2_YEAST                                                                       | 366               | D-SD-E----CEW---E-----EVELKPKNVKVFEDFLSKA--AR-LPY    | 397                 |

|                                                                                  |      |                                                      |      |
|----------------------------------------------------------------------------------|------|------------------------------------------------------|------|
| GEN_HUMAN                                                                        | 329  | -HEVI-----QEFLLNK--D----K----L-V-KV-IR-----Y--QRP    | 351  |
| RAD2_YEAST                                                                       | 398  | MGQSLNAGSKSF-LDKRHDQASPSKTTPTMRISRSVDEDDDEDYLKQIE    | 446  |
| GEN_HUMAN                                                                        | 352  | DL-LLFORFTLEKME-WPNHYACEKLLVL--LTHYDMIE-R---K---L    | 389  |
| RAD2_YEAST                                                                       | 447  | EIEMM-EAVQLSKMEKKPE--ADDKSKIAPVTSKG-TEARPPVQYGLL     | 492  |
| GEN_HUMAN                                                                        | 390  | GSR-NSNQLQPIRI--V--KTR--I-RNG--VHCFEIEWEKPEHYAMEDK   | 429  |
| RAD2_YEAST                                                                       | 493  | GAQPDS-K-QPYHVTNLNSKSESVIKRTSKTV--LS-EFRPPSQ--QEDK   | 535  |
| GEN_HUMAN                                                                        | 430  | QHGEFALLTIE-EESL-FEAY--P-----E--IVAVYQKQKLE--I--     | 463  |
| RAD2_YEAST                                                                       | 536  | --G--AILT-EGEQNLNF-ISHKIPQFDNFNENSL--LFQK-NTESNVSQ   | 576  |
| GEN_HUMAN                                                                        | 464  | KGKKQKRIKPKENNLPE-PDEVMS-FQSHMTLKPCTCEIFHKQNSKLNLSGI | 511  |
| RAD2_YEAST                                                                       | 577  | EATKEK--SP----IPEMP----SWFSS--TASQ--QLYNPYNT-TNF-V   | 610  |
| GEN_HUMAN                                                                        | 512  | SPDPTL--PQESISA-SLN---S--LL--LPKN-TPCLNAQ-EQFMSS--   | 547  |
| RAD2_YEAST                                                                       | 611  | E-DKNVRNEQES-GAETTNGKSSYELLTGL--NATEILERESEK-ESSND   | 655  |
| GEN_HUMAN                                                                        | 548  | -----LRPLAIQOI-KAV-SKSLISESSQNTSSHNI-SVIADLH---L     | 585  |
| RAD2_YEAST                                                                       | 656  | ENKDDDLVELS-EELFEDVPTKQISKEAEDN-DSRKVESINKE-HRKPL    | 702  |
| GEN_HUMAN                                                                        | 586  | STI-DWEGTSFS----NSPAIQRNTFSDHLKSEVESELSAIPDGFENIP    | 629  |
| RAD2_YEAST                                                                       | 703  | --IFDYD--FSEDEEDN--IVE-N-M--IK-EQE-EF----DTFKN--     | 732  |
| GEN_HUMAN                                                                        | 630  | EQLSCESERYTA-N--IK-KVLDE---DS-DGISPEEHLGSGIT-DLC--   | 668  |
| RAD2_YEAST                                                                       | 733  | TTLSTSAERNVAENAFVEDELFEQMKDKRD--S-DE-----VTMDIKE     | 774  |
| GEN_HUMAN                                                                        | 669  | LQDLPLKERIFTKLSY---PQD-NLQ-PDVNLKTLKLSILSVKESCIANS   | 713  |
| RAD2_YEAST                                                                       | 775  | VQEL-L-SR-F-GIPYITAPMEAEAQAEL-LQ-LN-L-V-DGIITDD-S    | 814  |
| GEN_HUMAN                                                                        | 714  | DC-----TSHLSKDLPGIPLQN--ESRDSK-ILK--G-D-----QLL      | 744  |
| RAD2_YEAST                                                                       | 815  | DVFLFGGTK-IYKNM--FHEKNYVEFYDAESILKLLGLDRKNMIELAQLL   | 861  |
| GEN_HUMAN                                                                        | 745  | QEDYKVN--TSV-PYSVSN-TVV-----KTCNVRP-PNTA-LDHSRKVD    | 782  |
| RAD2_YEAST                                                                       | 862  | GSDY-TNGLKMGMP--VSSIEVIAEFGNLK--NFKDWYNNQPF-DKRK--   | 903  |
| GEN_HUMAN                                                                        | 783  | MQTRKI--LMKK----SVCLDRHSSDE-QSAPVFGKAKYTTQR--MKH     | 822  |
| RAD2_YEAST                                                                       | 904  | QETENKFEKDLRKLNVNEIILD---DDFPSVMVY-DA-Y--MRPEVDH     | 945  |
| GEN_HUMAN                                                                        | 823  | SSQKH-----N--SSHF-K-ESG--HNKLS--PKIHKETEQCVR         | 855  |
| RAD2_YEAST                                                                       | 946  | DTTFVWVGPDLDMRLS-FMKTQLGWPEK-SDEILIP-L-IRDVNR--R     | 989  |
| GEN_HUMAN                                                                        | 856  | SYETAEE--NEESCFFDSTKSSLSLQCHKKENNS--GTCLDSPLPLRQ     | 899  |
| RAD2_YEAST                                                                       | 990  | KKKGKQKRINE--FFP--REYISG--DKKLNTSKRISTATGK---LKK     | 1028 |
| GEN_HUMAN                                                                        | 900  | RLKL 903                                             |      |
| RAD2_YEAST                                                                       | 1029 | R-KM 1031                                            |      |
| -----                                                                            |      |                                                      |      |
| Name 1: PFD6_HUMAN                                                               |      |                                                      |      |
| Name 2: PFD6_YEAST                                                               |      |                                                      |      |
| Prefoldin subunit 6 OS=Homo sapiens GN=PFDN6 PE=1 SV=1                           |      |                                                      |      |
| Prefoldin subunit 6 OS=Saccharomyces cerevisiae (strain ATCC 204508 / S288c) GN= |      |                                                      |      |
| YKE2 PE=1 SV=1                                                                   |      |                                                      |      |
| Needed for following interaction(s):                                             |      |                                                      |      |

```

yeast genetic RASK_HUMAN PFD6_HUMAN KRAS PFDN6 IRA2_YEAST
PFD6_YEAST

Length sequence 1: 129
Length sequence 2: 114
Sequence #1: PFD6_HUMAN
Sequence #2: PFD6_YEAST
Length #1: 136
Length #2: 136
Matrix: BLOSUM62
Gap open: 2.0
Gap extend: 1.0
Length: 136
Identity: 60/136 (44.12%)
Similarity: 76/136 (55.88%)
Gaps: 30/136 (22.06%)
Score: 249.00

PFD6_HUMAN 1 MAELIQKKLQGEVEKYQQLQKDLKSKSMGROKLEAQLTENNIVKEELALL 50
PFD6_YEAST 1 MSEL-----G--AKYQQLQNELEEFIVARQKLETQLQENKIVNEEFDQL 42

PFD6_HUMAN 51 DGSNV-VFKLLGPVL--VKQELGEARAT-VGKRLDYI-TAEIKRYESQLR 95
PFD6_YEAST 43 E-EDTPVYKLTGNVLLPVEQ--SEAR-TNVDKRFIET-EITRCEKNIR 87

PFD6_HUMAN 96 DLERQSE--QQ-R-ETLAQLQQEFQRAQAAGAPGK 128
PFD6_YEAST 88 D--KQEELEKMRSE-LIKLNN-----TAASTG-PGR 114

-----
Name 1: AP1G1_HUMAN
Name 2: AP1G1_YEAST

AP-1 complex subunit gamma-1 OS=Homo sapiens GN=AP1G1 PE=1 SV=5
AP-1 complex subunit gamma-1 OS=Saccharomyces cerevisiae (strain ATCC 204508 / S288c) GN=APL4 PE=1 SV=1

Needed for following interaction(s):
yeast genetic AP1G1_HUMAN BLM_HUMAN AP1G1 BLM AP1G1_YEAST
SGS1_YEAST

Length sequence 1: 822
Length sequence 2: 832
Sequence #1: AP1G1_HUMAN
Sequence #2: AP1G1_YEAST
Length #1: 939
Length #2: 939
Matrix: BLOSUM62
Gap open: 2.0
Gap extend: 1.0
Length: 939
Identity: 332/939 (35.36%)
Similarity: 500/939 (53.25%)
Gaps: 248/939 (26.41%)
Score: 1428.00

AP1G1_HUMAN 7 LRELIRTIRTARTQAEEREMIQECAAIRSSFREEDN-TY--RCR-NVAK 52
AP1G1_YEAST 5 LRSFIKDVIRGAKTLADERAITKQSAKIRTKLR-DDHLPHEKR-RVNIQK 52

AP1G1_HUMAN 53 LLYMHMLGYPAHFGQLECLKLIASQKFTDKRIGYLGAMLLLDERQDVHL- 101
AP1G1_YEAST 53 LLYLYILGKETHFGQVESINLIASDDFVDRKRLGYLAATLLLDESEDL-LT 101

AP1G1_HUMAN 102 LMTNCIKNDLNHSTQF-VQGLALCT-LGCMGSS-EMCRDLAGEVEKLLKT 148
AP1G1_YEAST 102 LLTNMLNNDLHHPNKYAV-SLAL-TSLGFL-SSPELARDLYPDVENIHK- 147

AP1G1_HUMAN 149 SNS---YLRKKAAL-CAVHVIRK-VPELMEMF-L-PATKNLLNEKN---H 188
AP1G1_YEAST 148 -NSRDPFLKK-ALQCAAKLIFKDV-SLLEIFNIEDITK-ILSSHSICTH 193

AP1G1_HUMAN 189 GVL--HT----SVVL--LT----EMCERSPDMLAHFRK--LVP-Q-LVR- 221

```

```

AP1G1_YEAST 194 GVLLGVTKIIQISILLIGLNRKKDB--DEDEDGI-DYSNDILSPLSLLLRD 240
AP1G1_HUMAN 222 --I-LKNLIM-S-GYSPEHDVSGISDPPFLO--VRI--LRL-LRILGR--N 259
AP1G1_YEAST 241 FFIRLEN--MNSKNIPEGYDVQGICDPFLQCEI-IYTLKLYFQV-GELLN 286
AP1G1_HUMAN 260 -DD--DSSEAMN--DILAQVATNTTETSKNVGNAILYETVLTII--MDIKSE 302
AP1G1_YEAST 287 SNNVLDYKD--NFCDLLTRIATNTDSTKNSGQAILYETVKTIFSLDL-NQ 333
AP1G1_HUMAN 303 SGLRVLAINILGRFLLNNDKNIRYVALTSLLKTV-QTDHNAVQRHRSTIV 351
AP1G1_YEAST 334 P-LRVLGINILAKFLAGKDNNTKYVSLNTLTKVVPQ-EPTAVQRHRKFI 381
AP1G1_HUMAN 352 DCLKDLDSVSKRRAMELSFALVNGNN-IRGMKELLYFL---DSCEPEFK 397
AP1G1_YEAST 382 HCLQDQTDVSIIRMALELSFAILDDSNLVE-LVNELMKFLAKQD--E-DSK 427
AP1G1_HUMAN 398 ADCASGIF----LAAEKYAPS---K--RWHIDTIRVLTAGSYVRDDAV 438
AP1G1_YEAST 428 -DLI--IYTIIDL-IDTF-DTRVVKDESWKLDVFFNILKLVGSGFINYEKI 472
AP1G1_HUMAN 439 PN--LIQLITN-SVEM--HA-YTVORLYKAI-L-G---DYSQQPLV--Q- 474
AP1G1_YEAST 473 -NDILI-IINNTS-QLSDKSEF-LRKML-TISLNGTSAEISEEN-IGWQL 516
AP1G1_HUMAN 475 VAAWCIGEYGDLLVS-GQCEE-EPEIQVTEDEVLD-IL---ESVL--ISN 516
AP1G1_YEAST 517 VLIWCIGEYGDVNLVNEGN-KNGAD-I-INESSITDYLLTLQE--LYTATN 561
AP1G1_HUMAN 517 MSTSVTRGYALTAIMKLSTRF-TC-TVNRICK-VVSIYSSIDVELQORA 563
AP1G1_YEAST 562 L--KII-NYILTAALKLSVRFHDAKNIKLRQLILS-YTDSTDSLQMKMS 607
AP1G1_HUMAN 564 VEYNALFKKYDH---MRSALLERMPVMEKVTNGPTEIVQTNGETEPAPL 610
AP1G1_YEAST 608 NQYE-IF--FNQISISVKKIILETMPKFEKIT----EE--QDNGK---A-L 644
AP1G1_HUMAN 611 ETKPPPSGPPQTSQANDLL-DLLGGNDITPVIPTAPTSKPSAGGEL--L 657
AP1G1_YEAST 645 -SKNLISN-EPV----DLSDDL-GED-S---KA-ESK-ASTGDNVKPI 680
AP1G1_HUMAN 658 DLL---GDIN-LTGAPAAAPAPASVPQISQPPFLDGLSS--QPLFNDI 700
AP1G1_YEAST 681 DILEEIFGEKNDI----AQVPKANANKEE-S-----INH-SSAVEA--N-- 715
AP1G1_HUMAN 701 AAGI--PSITAYSKNGLKIEFTFERSNTNPSV--TVITIQASNS--TELD 744
AP1G1_YEAST 716 -SGVTLP-LDA---N--KI---YDSSSLN--VYASLLS--A-NSGLAHL 750
AP1G1_HUMAN 745 MTDVFVQA-----AVPKTFQ-LQL--LSPSSSIVPAFNTGTI-T 779
AP1G1_YEAST 751 L--Y-FQAKSLISDLKTFCAVPKA-QKLTGLQLYPSSTI----NASQICK 792
AP1G1_HUMAN 780 QVIKVLNPQKQLRMRIKLTYNH-KGSAMQDLAEVN-NF 816
AP1G1_YEAST 793 QSLKISGSGK--LKLRVKLDL-HLNGSS--SI--TNEQF 824

-----
Name 1: RL35_HUMAN
Name 2: RL35_YEAST

60S ribosomal protein L35 OS=Homo sapiens GN=RPL35 PE=1 SV=2
60S ribosomal protein L35 OS=Saccharomyces cerevisiae (strain ATCC 204508 / S288c) GN=RPL35A PE=1 SV=1

Needed for following interaction(s):
yeast genetic RASK_HUMAN RL35_HUMAN KRAS RPL35 IRA2_YEAST
RL35_YEAST

Length sequence 1: 123
Length sequence 2: 120
Sequence #1: RL35_HUMAN

```

Sequence #2: RL35\_YEAST  
Length #1: 125  
Length #2: 125  
Matrix: BLOSUM62  
Gap open: 2.0  
Gap extend: 1.0  
Length: 125  
Identity: 71/125 (56.80%)  
Similarity: 93/125 (74.40%)  
Gaps: 7/125 (5.60%)  
Score: 339.00

|            |     |                                                     |     |
|------------|-----|-----------------------------------------------------|-----|
| RL35_HUMAN | 1   | MAKIKARDLRGKKKEELKQLDDLKVELSQRVAKVTGGAASKLSKIRV     | 50  |
| RL35_YEAST | 1   | MAGVKAYELRTRKSKEQLASQLVDLKKELAEKLVQKLS--RPS-LPKIKTV | 47  |
| RL35_HUMAN | 51  | RKSIARVLTVINQTKENLRKFKYKGYKPLDLRPKKTRAMRRRLNKHE-    | 99  |
| RL35_YEAST | 48  | RKSIACVLTVINEQQREAVRQLYKGGKYQPKDLRAKKTALRRALTKFEA   | 97  |
| RL35_HUMAN | 100 | ENLTKTKQQRKERL-YPLRKYAVKA                           | 123 |
| RL35_YEAST | 98  | SQV-TEK-QRKKQIAFPQRKYAICA                           | 120 |

-----  
Name 1: DDR1\_HUMAN  
Name 2: Q95ZV7\_CAEEEL

Epithelial discoidin domain-containing receptor 1 OS=Homo sapiens GN=DDR1 PE=1 SV=1  
Discoidin domain receptor protein 2, isoform a, partially confirmed by transcript evidence OS=Caenorhabditis elegans GN=ddr-2 PE=2 SV=1

Needed for following interaction(s):  
worm genetic RASK\_HUMAN DDR1\_HUMAN KRAS DDR1 LET60\_CAEEEL  
Q95ZV7\_CAEEEL

Length sequence 1: 913  
Length sequence 2: 797  
Sequence #1: DDR1\_HUMAN  
Sequence #2: Q95ZV7\_CAEEEL  
Length #1: 982  
Length #2: 982  
Matrix: BLOSUM62  
Gap open: 2.0  
Gap extend: 1.0  
Length: 982  
Identity: 330/982 (33.60%)  
Similarity: 478/982 (48.68%)  
Gaps: 271/982 (27.60%)  
Score: 1482.00

|               |     |                                                     |     |
|---------------|-----|-----------------------------------------------------|-----|
| DDR1_HUMAN    | 9   | LLLLLL-VA--SGD--A-DMKGFDPKCRYALGMQDRTPIDSDISASSS    | 52  |
| Q95ZV7_CAEEEL | 3   | LLLYLFGVTFHSENTVVALELR-----ECSHQLGMSNRKIRDEQISASSS  | 46  |
| DDR1_HUMAN    | 53  | WSD--STAARHSRL--ESSDGDGAWCPAGSV--FPKEEYLYQ----VDLQ  | 92  |
| Q95ZV7_CAEEEL | 47  | F-DLQSTGPGHARAHQES--GSGAWCPKNQINSLSK--EWLQISFSDVT-  | 90  |
| DDR1_HUMAN    | 93  | RLHLVALVGTQGRHAGGLGKEFERSYRLRYSDRG--RRWMGWKDRWQO-EV | 140 |
| Q95ZV7_CAEEEL | 91  | ---VITSVETQGRFDDGRGMEYATAFKIQYWRPSLNAWASYKDDF-ELET  | 136 |
| DDR1_HUMAN    | 141 | ISGNEDPEGVVLKDLGPPMVARLVRFYF--RADRVMSVCLRVELYGLWR   | 188 |
| Q95ZV7_CAEEEL | 137 | IPANNDTEHAIRRHLDRAIARRIRIVPVSNSSTR--TVMCRVVEVFGCPFD | 184 |
| DDR1_HUMAN    | 189 | DGLLSYTPV--GQTMYLEAV-YLND-STYDGHTVGG--LQYGGGLGQLA   | 232 |
| Q95ZV7_CAEEEL | 185 | DSLVFYFN--VDQGD--LQSGISY-HDFS-YDGNLANSPLHT--GGIGKLY | 226 |
| DDR1_HUMAN    | 233 | DGVVGLDD-FRKSQELRVWPGYDYVGVGWSNHSFSSGYVEMEFEDRLRAFQ | 281 |

|               |     |                                                      |     |
|---------------|-----|------------------------------------------------------|-----|
| Q95ZV7_CAEEEL | 227 | DGEVGNVVF-VNHH-K-W-----VGW-RRK-RNGNVKLAFEFSELNRIS    | 266 |
| DDR1_HUMAN    | 282 | AMQVHCNNMHTLGAR-LPGG-VECFRFR-RGPAMAWE-GEPMRH-NLGGNL  | 326 |
| Q95ZV7_CAEEEL | 267 | GILHTSNEFKKSAKAFSSATV--LFSINGK----DFSDTIVHFN---NP    | 307 |
| DDR1_HUMAN    | 327 | GD-----PR-ARAVSVPLGGRRVARFLQCRFL-FAG---PWLLF-SEISFI  | 365 |
| Q95ZV7_CAEEEL | 308 | EDTESEVPRWR---IPVNNRIAKVAKIR-LNF-GTDSDF-LFISEVNF     | 351 |
| DDR1_HUMAN    | 366 | SDVNNSS-PALGG--TFPPA-PWPPGPPPTNFSSLELEPRGQQPVAKA     | 411 |
| Q95ZV7_CAEEEL | 352 | S---NHTNIELLNDVVI PDSVSY-----F-SV-TE---HD-----       | 379 |
| DDR1_HUMAN    | 412 | EGSPTAILIGCLVAIILLLLLIIA---L-MLWR-LHWR-RLLS---KAER   | 452 |
| Q95ZV7_CAEEEL | 380 | DG--TS-MF-AFI-IFFFMFLIVAVIILTVLYRKREYRVKASSPSPNAKR   | 424 |
| DDR1_HUMAN    | 453 | RVLEEELTVHLSVPGDTILINNRPGPREPPYQEPFRGPNPPHSAPCVPN    | 502 |
| Q95ZV7_CAEEEL | 425 | EIL--LT---IDGNT--IKHHV---SPSTYQ--MARDN-----LQN       | 453 |
| DDR1_HUMAN    | 503 | GSALL---LSNPAYRLLLATYARPPRGP-GPPTPAWAKPTNTQ-AYSG-    | 545 |
| Q95ZV7_CAEEEL | 454 | --ALIEKMPMS-P-----IISDYAEPDISVCSVDV---A---NTPLLY-GI  | 489 |
| DDR1_HUMAN    | 546 | D--YMEPEKPGAPLLPPPQNS-VPHYAEADIVTLQGVVTGGNTYAVPALP   | 592 |
| Q95ZV7_CAEEEL | 490 | DGPY-DTQKRSNPL-----SSMV-KY--SDY-----GEVYCT-TLP       | 520 |
| DDR1_HUMAN    | 593 | PGAVGDGPPRVDFPRSRRLF-KEKLGEGQFGEVHLCVDSPODLVSLDFP    | 641 |
| Q95ZV7_CAEEEL | 521 | --EIA---R-D---KL-ICVSRIGQGEFGEVDLC-----Q---LE--      | 547 |
| DDR1_HUMAN    | 642 | LNVRKGHPLLVAVKILRPDATKNARNDL-L-KEVKIM-SRLKDPNIIRLL   | 688 |
| Q95ZV7_CAEEEL | 548 | -N-RK-----VAVKKLH--GISQA-DEFSFHREIRVLGS-LKHNVVEVV    | 586 |
| DDR1_HUMAN    | 689 | GVC-VQDDP-LCMITDYMENGLNQFLSAHQLEDKAAEGAPGDGQAAQGP    | 736 |
| Q95ZV7_CAEEEL | 587 | GVCTIQ-KPILC-IMEYMENGLKSYI---L-K--N-P-TIQTSQ--       | 621 |
| DDR1_HUMAN    | 737 | TISYPMLLHVAAQIASGMRYLATLNFVHRDLATRNCLV-GE-NFTIKIAD   | 784 |
| Q95ZV7_CAEEEL | 622 | CIS-----ICTQLAAGLAYLES CNFVHRDIAARNCLVDGEGN--VKIAD   | 663 |
| DDR1_HUMAN    | 785 | FGMSRNLVYAGDYRVRQGRAVLP IRWMAWECILMGKFTTASDVWAFGVTLW | 834 |
| Q95ZV7_CAEEEL | 664 | FGMARSLYSQEYKVEGKFLVLP IRWMAWEEALLGKFTTASDVWGFVMTW   | 713 |
| DDR1_HUMAN    | 835 | EVLMLCRAQPFQGLTDEQVIENAGEFFRDQG--RQVYLSRPPACPGLY-    | 881 |
| Q95ZV7_CAEEEL | 714 | EIFSLCSEKPYSDMTDDDDVVENL-QSMSSTGSLKQV-LSRPRMCPKSLYN  | 761 |
| DDR1_HUMAN    | 882 | ELMLRCWSRESEQRPPFSQLHRFLAEDAL-NT                     | 912 |
| Q95ZV7_CAEEEL | 762 | EQILPCWNYESSRRPFSFENVHLLH-L-Q-SLVHT                  | 791 |

-----  
Name 1: RAB9A\_HUMAN  
Name 2: YPT7\_YEAST

Ras-related protein Rab-9A OS=Homo sapiens GN=RAB9A PE=1 SV=1  
GTP-binding protein YPT7 OS=Saccharomyces cerevisiae (strain ATCC 204508 / S288c ) GN=YPT7 PE=1 SV=1

Needed for following interaction(s):  
yeast genetic PTTG1\_HUMAN RAB9A\_HUMAN PTTG1 RAB9A SECU\_YEAST  
YPT7\_YEAST

Length sequence 1: 201  
Length sequence 2: 208  
Sequence #1: RAB9A\_HUMAN  
Sequence #2: YPT7\_YEAST

Length #1: 220  
 Length #2: 220  
 Matrix: BLOSUM62  
 Gap open: 2.0  
 Gap extend: 1.0  
 Length: 220  
 Identity: 111/220 (50.45%)  
 Similarity: 148/220 (67.27%)  
 Gaps: 31/220 (14.09%)  
 Score: 564.00

|             |     |                                                     |     |
|-------------|-----|-----------------------------------------------------|-----|
| RAB9A_HUMAN | 1   | MAG-KSSLFKVILLGDGGVKGSSLMNRYVTN-KFDTQLFH-TIGVEFLNK  | 47  |
| YPT7_YEAST  | 1   | MSSRKKNILKVIILGDSGVGKTSLMHRVYV-NDKY-SQYKATIGADFLTK  | 48  |
| RAB9A_HUMAN | 48  | DLEVDGHFV-TMQIWDTAGQERFRSLRTPFYRGSDCCLLTFSDVDSQSFQ  | 96  |
| YPT7_YEAST  | 49  | EVTVDGDKVATMQVWDTAGQERFQSLGVAFYRGADCCVLVYDVTNASSFE  | 98  |
| RAB9A_HUMAN | 97  | NLSNWKKEFIYYADVKEPESFPFVILGNKIDISE-RQ-VSTEE-AQ--AW  | 141 |
| YPT7_YEAST  | 99  | NIKSWRDEFLVHANVNSPETFPFVILGNKIDAEESKIVS-EKSAQELA-   | 146 |
| RAB9A_HUMAN | 142 | CRDNGDYPIYFETSADKDATNVAAAFEE-AVRRVL---A-T---EDRSDHL | 182 |
| YPT7_YEAST  | 147 | -KSLGDIPLFLTSAKNAINVDTAFAEEIA-RSALQQNQADTEAFED--DY- | 191 |
| RAB9A_HUMAN | 183 | IQTDTVNLHRKPKPSSSC-C                                | 201 |
| YPT7_YEAST  | 192 | --NDAINI-RLDGENNSSC                                 | 208 |

Name 1: IRS1\_HUMAN  
 Name 2: IRS1\_DROME

Insulin receptor substrate 1 OS=Homo sapiens GN=IRS1 PE=1 SV=1  
 Insulin receptor substrate 1 OS=Drosophila melanogaster GN=chico PE=1 SV=1

Needed for following interaction(s):  
 fly genetic IRS1\_HUMAN PTEN\_HUMAN IRS1 PTEN IRS1\_DROME  
 Q7KMQ6\_DROME

Length sequence 1: 1242  
 Length sequence 2: 968  
 Sequence #1: IRS1\_HUMAN  
 Sequence #2: IRS1\_DROME  
 Length #1: 1306  
 Length #2: 1306  
 Matrix: BLOSUM62  
 Gap open: 2.0  
 Gap extend: 1.0  
 Length: 1306  
 Identity: 371/1306 (28.41%)  
 Similarity: 554/1306 (42.42%)  
 Gaps: 497/1306 (38.06%)  
 Score: 1300.00

|            |     |                                                     |     |
|------------|-----|-----------------------------------------------------|-----|
| IRS1_HUMAN | 1   | MASPPESDGFSDVRKVGYLKPKSMHKRFVFL--RAASEAGGPALLEYYE   | 48  |
| IRS1_DROME | 1   | MASISD-DGMA-L-S-GYLKCLKTKMKKFFVLYEETSTSA---ARLEYD   | 43  |
| IRS1_HUMAN | 49  | NEKKWRHKSSAPKRSIPLESCFNINKRADSKNKHVALYTRDEHFAIAD    | 98  |
| IRS1_DROME | 44  | TEKKFLQRAE-PKRVIIYLKNCFNINRRLDTRKRFVIVLSSRDGGFGIVL- | 91  |
| IRS1_HUMAN | 99  | SEAEQD--SWYQALLQLHNRKAGHHDGAAALGAGGGGSCSGSSGLGEAG   | 146 |
| IRS1_DROME | 92  | -ENENDLRKWLKLLVL-QR-----N---I-A---NS-NGT-----A-     | 118 |
| IRS1_HUMAN | 147 | EDLS-YGDVPPGPAFKEVWQVIL-KPKGLGQTKNLIGI---YRLCLTSKT  | 191 |
| IRS1_DROME | 119 | H--SPY-D-----HVWQVVIQK-KGISE-K--VGITGTYHCLTSKS      | 153 |
| IRS1_HUMAN | 192 | ISFV-----KL-NSE--AAAV-VLQLMNIIRRCGH-S-ENFFIEVGRSAV  | 230 |

|            |     |                                                     |      |
|------------|-----|-----------------------------------------------------|------|
| IRS1_DROME | 154 | LTFVCIGPEKTPNGEDRVASIEIL-LTIRRCGHASQPICIFYVELGRQSV  | 202  |
| IRS1_HUMAN | 231 | TGPGEFWMQVDDSVVAQNMHETILEAMRAM--SD---E-F--RP-----   | 266  |
| IRS1_DROME | 203 | LGSGDLWMETDNAAIATNMHNTILSAMSAKTESNTNLINVYQNRPDLSHE  | 252  |
| IRS1_HUMAN | 267 | --RSKSQSSSN-CSNPISVPLRRHHLNPPPSQVGLTRRSRTESITATSP   | 313  |
| IRS1_DROME | 253 | PMRKRS--SSANEASKPINVNV---IQN---SQNSLELRS-----CSSP   | 288  |
| IRS1_HUMAN | 314 | ASMVG-GKPGSFRVRASSDGEGTMSRPASVDGSPVSPSTNRTH-AHRH--  | 359  |
| IRS1_DROME | 289 | HN-YGFG-----RERC--D-----SLPTR-NGT-LSESSNQTYFGSNHGL  | 323  |
| IRS1_HUMAN | 360 | RG---SA-RLHPPLN-HRSRIP---MPASRCSPSATSPVLSSSSSTSGHG  | 401  |
| IRS1_DROME | 324 | RSNTISGIRPH-STNKHSNS-PTFTMPL-RCSESESSISVDES--DDNG   | 368  |
| IRS1_HUMAN | 402 | STSDCLFPR---RSS-ASVSGSPSDGGFISSEYSSPCD-FRSSFRSVT    | 446  |
| IRS1_DROME | 369 | SFSH--Y-RLNTRSETAI---PEEN--I---DDFASA--ELF--S-K-VT  | 402  |
| IRS1_HUMAN | 447 | PDSLGHTPPARGEEELSNYICMGKGPSTLTAP-NG-HYILSR-GGNHR    | 493  |
| IRS1_DROME | 403 | -EQ--NV-----SDE--NYIPM--NP--VN-PTDAIH---EKEKADMQR   | 433  |
| IRS1_HUMAN | 494 | CTPGTGLGTS-PALAGDEAASAADL--DNR-FRK-RTHSAGTSPTITHQK  | 538  |
| IRS1_DROME | 434 | LEDAS-LHFNFPEHASEKLAKDFLDSDNQCCRPDIRAYSIGNK--VEHLK  | 480  |
| IRS1_HUMAN | 539 | TPSQSSVASIEEYTEMPP---AYPPGGSGRRLPGHRHSAFPVTRSYPE    | 584  |
| IRS1_DROME | 481 | F-NK-RLGHLND-TGQNPNRVRAY-----S---V-GSK-SK-IP-RC---  | 512  |
| IRS1_HUMAN | 585 | EGLE-MHPL-E-RRGGH---HRPDSSTLHTDDG--Y-----MPMSPGV    | 619  |
| IRS1_DROME | 513 | D-LQRV-VLVEDNK--HEFTANRSQSS-I-TKEGTSYSSANRQKSTST-   | 555  |
| IRS1_HUMAN | 620 | AP-----VPSGRKSGDYMPM--SPKSVS-APQQII--NPIRRHPQRV     | 657  |
| IRS1_DROME | 556 | APLLSLKNQINSDRM-S-DLMEIDFS-QATNLEKQKFKINNEI---PKYI  | 599  |
| IRS1_HUMAN | 658 | DPNGYMMSPSGGCSP--DIGGGPSSSSSSNAVPSGTSYK-LWTNGVG     | 704  |
| IRS1_DROME | 600 | E-N---VF-PK---APRTD-----SSSLTLHA---TSQ-KDIF-NG--    | 627  |
| IRS1_HUMAN | 705 | GHHSHVLPHPKPPVESSGGKLLPCTG-D-YMNSPVGDSN--TSSP-SDC   | 749  |
| IRS1_DROME | 628 | ---T-----K--LNNTA---I---TSEDGYLEMKPVG--NGYT--PSSNC  | 657  |
| IRS1_HUMAN | 750 | YYGP---EDPQHKPVLS-YYSLPRSFKHTQRPGEPEEGARHQHL-RLSTS  | 794  |
| IRS1_DROME | 658 | L--PMKVE--KLK--LSDYQTAP-PL--T-ATAAP---V-HD-LNKIST-  | 691  |
| IRS1_HUMAN | 795 | SGRLLYAATAD---D--S-SSSTSSDS-LGGG-YCGAR---LE-PSLPHP  | 832  |
| IRS1_DROME | 692 | -----YNISAEKWREQPSRSEKKSNSPLNDNTF--SSKPTNVESTSKSHD  | 735  |
| IRS1_HUMAN | 833 | -H--HQV-LQPHLPKVDTAQTNSRLARPTRLSLGDPK-A--STLP-RA    | 874  |
| IRS1_DROME | 736 | VHSANQIDCE-----KV--CAQSSDKL-N-NHLA--D-KIVENNNLDIGG  | 773  |
| IRS1_HUMAN | 875 | REQQQQQPLLHPPEPKS-PGE-Y--V---NIEFGS-DQSGY--LGGPV    | 913  |
| IRS1_DROME | 774 | HEEKK---LVH-----SISSEDTQIKDKSN-DFTKFNAGYKILQ--I     | 811  |
| IRS1_HUMAN | 914 | AFHS-SPSVRCPSQL-QPAPREEETGTEEYMKMD-LGPGRRAAWQESTGV  | 960  |
| IRS1_DROME | 812 | --KSDS-SL-ISSKLYQ---K---GI--H-K-DNL---ERS--QRLT--   | 839  |
| IRS1_HUMAN | 961 | E-MGRLGPAPPGAASICRPTRAVPSSRGGDYMTQMCSQPRQSYVDTS-PAA | 1008 |
| IRS1_DROME | 840 | ESVNTI---PDNATA-----T-AV-SS-SS-LT-KFN-----INSAKPA   | 871  |

|                                                                                  |              |                                                     |             |
|----------------------------------------------------------------------------------|--------------|-----------------------------------------------------|-------------|
| IRS1_HUMAN                                                                       | 1009         | PVSYADMR-TGI--AA-E---EV-SL--P-RATMAAASSSSAASASPTGP  | 1047        |
| IRS1_DROME                                                                       | 872          | --A-ADSRSTGTDPTPNILQIKDLNFP--SSSRIS-QP---           | 907         |
| IRS1_HUMAN                                                                       | 1048         | QGAAELAHAH-SSL-LGGPQGGMSAFTRVNLSPNRRQSAKVIADPOGC    | 1095        |
| IRS1_DROME                                                                       | 908          | ----EL--HYASLDL--PH---CSG-Q-N--P-----AKYLK---RGS    | 932         |
| IRS1_HUMAN                                                                       | 1096         | RRRHSSSETFSSTP-SA-TRVGNTPFGAGAAVG-GGGGSSSSSEDVKRHS  | 1142        |
| IRS1_DROME                                                                       | 933          | R-----E---SPPVVSACPEDGNT--Y---AKIDFDQSDSSSSSSNI---- | 965         |
| IRS1_HUMAN                                                                       | 1143         | SASFEN                                              | 1148        |
| IRS1_DROME                                                                       | 966          | ---F-N                                              | 967         |
| -----                                                                            |              |                                                     |             |
| Name 1: PK3CB_HUMAN                                                              |              |                                                     |             |
| Name 2: P91634_DROME                                                             |              |                                                     |             |
| Phosphatidylinositol-4,5-bisphosphate 3-kinase catalytic subunit beta isoform OS |              |                                                     |             |
| =Homo sapiens GN=PIK3CB PE=1 SV=1                                                |              |                                                     |             |
| Phosphoinositide 3-kinase, Dp110 OS=Drosophila melanogaster GN=Pi3K92E PE=1 SV=1 |              |                                                     |             |
| Needed for following interaction(s):                                             |              |                                                     |             |
| fly                                                                              | physical     | RASK_HUMAN                                          | PK3CB_HUMAN |
| ME                                                                               | P91634_DROME |                                                     | KRAS        |
|                                                                                  |              |                                                     | PIK3CB      |
|                                                                                  |              |                                                     | RAS1_DRO    |
| Length sequence 1: 1070                                                          |              |                                                     |             |
| Length sequence 2: 1088                                                          |              |                                                     |             |
| Sequence #1: PK3CB_HUMAN                                                         |              |                                                     |             |
| Sequence #2: P91634_DROME                                                        |              |                                                     |             |
| Length #1: 1187                                                                  |              |                                                     |             |
| Length #2: 1187                                                                  |              |                                                     |             |
| Matrix: BLOSUM62                                                                 |              |                                                     |             |
| Gap open: 2.0                                                                    |              |                                                     |             |
| Gap extend: 1.0                                                                  |              |                                                     |             |
| Length: 1187                                                                     |              |                                                     |             |
| Identity: 484/1187 (40.78%)                                                      |              |                                                     |             |
| Similarity: 695/1187 (58.55%)                                                    |              |                                                     |             |
| Gaps: 255/1187 (21.48%)                                                          |              |                                                     |             |
| Score: 2354.00                                                                   |              |                                                     |             |
| PK3CB_HUMAN                                                                      | 8            | PPAMA-DILDIWAVDSQIAS--DGSIPVDFLLPTGIYIQLEV-PREA-TI  | 52          |
| P91634_DROME                                                                     | 27           | PPCMRFVS-NLW--KNEMLNWVD--L-I-CLLPNGFLLLELRVNP--ANTI | 67          |
| PK3CB_HUMAN                                                                      | 53           | SYIK-QMLWKQVHNYPMFNLLMIDSYMF--ACVNQTAVY--E--ELE--   | 93          |
| P91634_DROME                                                                     | 68           | QVIKVEVMV-NQAKQMP----L---GYVIKEACEYQ--VYGISTFNIEPY  | 106         |
| PK3CB_HUMAN                                                                      | 94           | -DETRRLCDVRPFLPVLKL-----VTR-SCDPGEKLDK-I-GVLIGKGL   | 134         |
| P91634_DROME                                                                     | 107          | TDETKRLSEVQPYFGLISLGERDTTTSFSSD-YE-L-TKMVNG-MIGT--  | 150         |
| PK3CB_HUMAN                                                                      | 135          | HEFD-SLK---DPEVNEFRKMRKF--S-E-EKILSLVGLSWMWLKQ--    | 174         |
| P91634_DROME                                                                     | 151          | -TFDHN-RTHGSPEDDFRFLYMTQCDNIELER--S---AY-TW-QQRL    | 190         |
| PK3CB_HUMAN                                                                      | 175          | TYPPEHEP-----S--IPENL--E---DKLYGGKLIVAV-HFENCQDVFS  | 211         |
| P91634_DROME                                                                     | 191          | LY--EH-PLRLANSTKMPE-LIRERHPTRTF--LIV-VKN-ENDQSTFT   | 231         |
| PK3CB_HUMAN                                                                      | 212          | FQVSPN-MN-PIKVNELAIQK--RLTIHGK-EDEVSPIYVQLVQSGRVEY  | 256         |
| P91634_DROME                                                                     | 232          | LSV--NEQDTPFSLTESTLQKMNRSQM--KMNDRTS--DYILKVSGRDEY  | 275         |
| PK3CB_HUMAN                                                                      | 257          | VFGDHPLIQFYQIRNCVMNRALPHFILVECKIKKMYEQEMIAIEAAIN-   | 305         |
| P91634_DROME                                                                     | 276          | LLGDYPLIQFLYIQEMLSDSAVNP-V-V---LQSVY-R---LESYINH    | 314         |
| PK3CB_HUMAN                                                                      | 306          | RNSSNLPL---PLPPKKT-RI---ISHVWENNPNPFQIVL--VKGNKLNTE | 346         |

|                                                                                  |      |                                                     |      |
|----------------------------------------------------------------------------------|------|-----------------------------------------------------|------|
| P91634_DROME                                                                     | 315  | HNEQAM-VTKRPLPKRKTVHLHKSISLWDMGNYFQLTLHSI-SN-VNFD   | 361  |
| PK3CB_HUMAN                                                                      | 347  | ET--VK--VHVRAGLFHGTELLC--K-TIVSSEVSGKN-D-HIWNEPL--  | 385  |
| P91634_DROME                                                                     | 362  | KTRALKVGVHV-C-LYHGDKKLAQRST--DSP-NG-NFDTFLFND-LVM   | 404  |
| PK3CB_HUMAN                                                                      | 386  | EFDINICDLPRMARLCFAVYAVLDKV-KTKKSTKTINPSKYQTIKAGK-   | 433  |
| P91634_DROME                                                                     | 405  | DFDIQMRNLRMTRLCIVIFEV-TKMSRSKSS---N-NK--DI--ALKD    | 445  |
| PK3CB_HUMAN                                                                      | 434  | VHY---PVAVNTMVDFDKQLRTGDIILHSWSSFPDELE--EMLNPMGT    | 478  |
| P91634_DROME                                                                     | 446  | VPYKNPLAWVNTTIFDHKIDILRTGRHTLYTW-TYADDIQSVEVFHPLGT  | 494  |
| PK3CB_HUMAN                                                                      | 479  | VQTPNPYTENATALHV--KFPENKQPYYPFPDKII-EKAAEIASSDSAN   | 525  |
| P91634_DROME                                                                     | 495  | IEPNRKEEC-AL-VDLTFLSSGTGTVYPS--EEVVLQYAAD--REQVN    | 538  |
| PK3CB_HUMAN                                                                      | 526  | -VSSR--GG-KKFLPV--LKEI-----LDRDPLSQLCENEMDLIWTLRQ   | 563  |
| P91634_DROME                                                                     | 539  | RL-QRQLAGPEK--PIKELKELMANYTGLDK--IYEMVQDRNAIWERRN   | 583  |
| PK3CB_HUMAN                                                                      | 564  | D-CREIFPQSLPKLLL-SIKWNKLE--DVAQLQALL-QIWP--KLPPREA  | 606  |
| P91634_DROME                                                                     | 584  | DILREL-PEEL-SILLHCVYW-K-ERDDVADMWYLLKQ-WPLISI-ER-S  | 626  |
| PK3CB_HUMAN                                                                      | 607  | LELLDFNYPDQVREYAVGLRQMSDEELSQYLLQLVQVLYEYFFL--DC    | 654  |
| P91634_DROME                                                                     | 627  | LELLDYAYPDPAVRRFAIRCLHFLKDEDLVLLQLVQAIKHESYLESDL    | 676  |
| PK3CB_HUMAN                                                                      | 655  | ALSRFLLERALGNRRIGQFLFWHLRSEVHIPAVSVQ--FGVILEAYCRGS  | 702  |
| P91634_DROME                                                                     | 677  | VV--FLLERALNRQIRIGHYFFWHLRSEMQTP--SMQTRFGLLEVLKGC   | 722  |
| PK3CB_HUMAN                                                                      | 703  | VGHMKVLSKQVEALNKLKTLNLSLIKLNVAKLNRAK-GKAMHTCLKQSAY  | 751  |
| P91634_DROME                                                                     | 723  | KHHVAPLRKQLHVLEKLLQ--GSLI--A-K---KGSKEKVKTML-QD-F   | 761  |
| PK3CB_HUMAN                                                                      | 752  | -RE----AL-SDLQSPLNP---CVILSELYV--EKCKYMSKMKPLWLVI   | 790  |
| P91634_DROME                                                                     | 762  | LRDQRNSAVFQNIQNPLNPSFRC--SG--VTPDRCKVMSKMRLLWVVF    | 806  |
| PK3CB_HUMAN                                                                      | 791  | NN-KVFGEDSVGVIFKNGDDLRODMLTLQMLRLMDLLWKEAGLDRM-LP   | 838  |
| P91634_DROME                                                                     | 807  | ENADVNASD-VHIFKNGDDLRODMLTLQMLRVMQWLKRDGMDFRMMNI-   | 854  |
| PK3CB_HUMAN                                                                      | 839  | YGCLATGDRS-GLIEVVSTSETIADIQLNSSNV-AAAAAFNKDALLNLWK  | 886  |
| P91634_DROME                                                                     | 855  | YNCSISM-EKSLGMIEVVRHAETIANIQ-KEKGMFSATSFPKGSLLSLWK  | 902  |
| PK3CB_HUMAN                                                                      | 887  | EYNS-GDDLDRAIIEFTLSCAGYCVASYVLGIGDRHSDNIMVKKTGQLFH  | 935  |
| P91634_DROME                                                                     | 903  | EHNKPADKLNKAINEFTLSCAGYCVATVYVLGVADRHSNIMVKRNGQLFH  | 952  |
| PK3CB_HUMAN                                                                      | 936  | IDFGHILGNFKSKFGIKRERVFPILTYDFIHVIQOQKTG-N-TE-K-FGR  | 981  |
| P91634_DROME                                                                     | 953  | IDFGHILGHFKEKLGVRREVRVPFVLTHDFVYVI--NK-GFNDRESKEFCH | 999  |
| PK3CB_HUMAN                                                                      | 982  | FRQCCEDAYLILRRHGNLFTLTFALMLTAGLPELTSVKDIQYLKDSLALG  | 1031 |
| P91634_DROME                                                                     | 1000 | FQELCERAFVLRKKGCLLISLFSMMISTGLPELSSSEKDLDYLRRETLVLD | 1049 |
| PK3CB_HUMAN                                                                      | 1032 | KSEEEALKQ-FKQKFDEALRESWTTKVNWMAHTVRKD               | 1067 |
| P91634_DROME                                                                     | 1050 | YTEEKA-REHFRAKFSEALANSWKTSLNASHNFNFSKN              | 1085 |
| -----                                                                            |      |                                                     |      |
| Name 1: KTHY_HUMAN                                                               |      |                                                     |      |
| Name 2: KTHY_YEAST                                                               |      |                                                     |      |
| Thymidylate kinase OS=Homo sapiens GN=DTYMK PE=1 SV=4                            |      |                                                     |      |
| Thymidylate kinase OS=Saccharomyces cerevisiae (strain ATCC 204508 / S288c) GN=C |      |                                                     |      |
| DC8 PE=1 SV=2                                                                    |      |                                                     |      |

Needed for following interaction(s):  
 yeast physical KTHY\_HUMAN BLM\_HUMAN DTYMK BLM KTHY\_YEA  
 ST SGS1\_YEAST  
 yeast genetic KTHY\_HUMAN BLM\_HUMAN DTYMK BLM KTHY\_YEAST  
 SGS1\_YEAST

Length sequence 1: 212  
 Length sequence 2: 216  
 Sequence #1: KTHY\_HUMAN  
 Sequence #2: KTHY\_YEAST  
 Length #1: 230  
 Length #2: 230  
 Matrix: BLOSUM62  
 Gap open: 2.0  
 Gap extend: 1.0  
 Length: 230  
 Identity: 104/230 (45.22%)  
 Similarity: 135/230 (58.70%)  
 Gaps: 50/230 (21.74%)  
 Score: 491.00

|            |     |                                                      |     |
|------------|-----|------------------------------------------------------|-----|
| KTHY_HUMAN | 1   | MAARRGALIVLEGVDRAGKSTQ-S---RKLVEALCAAGHRAELLRFPERS   | 46  |
| KTHY_YEAST | 1   | MMG-RGKLLILIEGLDRTGKTTQCINILYKKL-QPNC-----KLLKFPERS  | 42  |
| KTHY_HUMAN | 47  | TEIGKLLSSYLQKKS-DVEDHSVHLLFSANRWEQVPLIKEK-LSQGVTLV   | 94  |
| KTHY_YEAST | 43  | TRIGGLINEYLTDDSFQQLSDQAIHLFLFSANRWEIVDKIK-KDLLEGKNIV | 91  |
| KTHY_HUMAN | 95  | VDRYAFSGVAFTGAK-EN-FSLDWCKQPDVGLPKPDLVLFQLQ-LAD--    | 139 |
| KTHY_YEAST | 92  | MDRYVYSGVAYSAAKGTNGMDLDWCLQPDVGLLKPDLTLFLSTQDV-DNN   | 140 |
| KTHY_HUMAN | 140 | AAKRGAFGHERYENGAFQERALRCFHQLMKDITLNNKVMVDASKSI-EAVH  | 188 |
| KTHY_YEAST | 141 | AEKSG-FGDERYETVKFQEK-----VKQTFM--KLLD--KEIRKG-D      | 176 |
| KTHY_HUMAN | 189 | EDIRVLSEDAIRTATEKPLG---E-L-WK                        | 212 |
| KTHY_YEAST | 177 | ESITIV--D-V---TNK--GIQVEVALIQ                        | 198 |

Name 1: DOCK3\_HUMAN  
 Name 2: YL422\_YEAST

Dedicator of cytokinesis protein 3 OS=Homo sapiens GN=DOCK3 PE=1 SV=1  
 DOCK-like protein YLR422W OS=Saccharomyces cerevisiae (strain ATCC 204508 / S288  
 c) GN=YLR422W PE=1 SV=1

Needed for following interaction(s):  
 yeast genetic RASK\_HUMAN DOCK3\_HUMAN KRAS DOCK3 IRA2\_YEAST  
 YL422\_YEAST

Length sequence 1: 2030  
 Length sequence 2: 1932  
 Sequence #1: DOCK3\_HUMAN  
 Sequence #2: YL422\_YEAST  
 Length #1: 2312  
 Length #2: 2312  
 Matrix: BLOSUM62  
 Gap open: 2.0  
 Gap extend: 1.0  
 Length: 2312  
 Identity: 610/2312 (26.38%)  
 Similarity: 970/2312 (41.96%)  
 Gaps: 926/2312 (40.05%)  
 Score: 2116.00

|             |    |                                                    |    |
|-------------|----|----------------------------------------------------|----|
| DOCK3_HUMAN | 2  | WTPTEEEK--YGVVICSF----RGSVPQGLVLE-----IG-ETVQIL    | 36 |
| YL422_YEAST | 9  | WLPT--DRLIYGVLVKSFPLQR--YPE-LVYENSNYANVYVGAE-VYVF  | 52 |
| DOCK3_HUMAN | 37 | E-----K-CEGWY---RG-----VS---TKK---PNVKG---IFPANYIH | 63 |

|             |     |                                                     |     |
|-------------|-----|-----------------------------------------------------|-----|
| YL422_YEAST | 53  | EESVDKWK CRA-YQCLRPFFPEEFISNMNSANDVLPDVKPKVVFPRKYVH | 101 |
| DOCK3_HUMAN | 64  | L--KKAIVSN---RG-QYETVPL-----E-----DSI-V--T-EV-TA    | 91  |
| YL422_YEAST | 102 | FEAEKA-VSTMPFFKAPSAEDFKPLISKECESRSFCDSLYVSSSTDDISTG | 150 |
| DOCK3_HUMAN | 92  | ----T-----LQEWASLWK-Q---L-YV-KHKV---DL--F--Y        | 113 |
| YL422_YEAST | 151 | KPRKTPRPPFPFRYQK-RS-FKDEMGPILSLISH-VYSMYSIGEFISIY   | 197 |
| DOCK3_HUMAN | 114 | -KLRHVMNEL---ID-LR-ROLLSGLH-TQ-DQ---VR---EVKRHIT-V  | 148 |
| YL422_YEAST | 198 | RKM--I--KLYYDLDTIRFR--LSMNLTEAEKINLIRAATSL-R--TKI   | 238 |
| DOCK3_HUMAN | 149 | -R-LD--W-GNEHLGL-DLVPRK-D---FE-V---VDSQD-IS--VSDL   | 180 |
| YL422_YEAST | 239 | AKFLSSTYRKNK-L-IANSTPRNPDYPGFEGIFARDIDTGELLSYEI-D-  | 284 |
| DOCK3_HUMAN | 181 | YKMH-L-SSRSVQQS-TSQVDTMRP-----RHG--ETCRMPVPHH       | 216 |
| YL422_YEAST | 285 | -KLRTLVSS--SMLCGLTNNFPTV-PVVESDDESSNGLFGTVRSSI---   | 327 |
| DOCK3_HUMAN | 217 | FFLSLKSFTYN-TIGED---TDVFFSL---YDMREGK-QI-SERFLVRLNK | 258 |
| YL422_YEAST | 328 | -LVNLKDLAWDPSI-SDPKYQDL--SICVY-LRT-KDEVLTSEF--TMTK  | 369 |
| DOCK3_HUMAN | 259 | NGGPRNPEK-IERMCA-LFTD-LSS---KDMKRDLIVAHVIR--IG---   | 297 |
| YL422_YEAST | 370 | SS---NMESALDEIPAMLFKNILETIVHKN-K--VYLVV-VLKETIAITT  | 412 |
| DOCK3_HUMAN | 298 | RM---L--LN---DSKK-GP--P-----H-L-HYRRPYG-CA-VLSIL    | 325 |
| YL422_YEAST | 413 | ETAPEISSYNIESTESSHSPFNSSTENKIDHVKK--GLAAGVINIS      | 460 |
| DOCK3_HUMAN | 326 | DVLQ---SLTEV--KEEKDFVLKVYTC-----N-NES---E--W-SQIH   | 357 |
| YL422_YEAST | 461 | PVFKFYNGLS-VANKAQR-FNLYLYSSDSSDSQFNSSKADLWGGLI-     | 507 |
| DOCK3_HUMAN | 358 | EN-IIRKSSAK-YSA-PSA-SHGLIISL-QLLRGDMEQIRRENPMIFNRG  | 402 |
| YL422_YEAST | 508 | -NKII-KDSSEGVSNPRAVS--LSVTKEII-G--KQ-EAEK--VLSTS    | 547 |
| DOCK3_HUMAN | 403 | LA-ITRKLGFPP---DVIM--PGDIRNDLYLTLEKGFDFER-G--G-KSVQ | 441 |
| YL422_YEAST | 548 | LVPRI-RSI--PTYFYDT-MFSQAE-R--IYLNL--G---RVSLYGLPAAD | 585 |
| DOCK3_HUMAN | 442 | KNIE-VTMYV-LYADGEILKDCIS-LGSGEPNRS-SYHSFVLYHSN-SPR  | 486 |
| YL422_YEAST | 586 | TNIENVT--VQISCRNKAVKFCNKKL---E-ERSGDW-KFVSVRPNES--  | 626 |
| DOCK3_HUMAN | 487 | WGEI IKLP-IP-I--D---R---F-RGSHL--RFEFRHCSTKDKGE---  | 519 |
| YL422_YEAST | 627 | IGESIRIEGVNMMNEDETLRVLVYVYNG-FLMAKSNI-H--IKKNEIIEY  | 672 |
| DOCK3_HUMAN | 520 | KKLFGFAFSTLMRDDGTTLSDDIH-ELYVYKCDENSTFNNHALYGLPCC   | 568 |
| YL422_YEAST | 673 | RK--GTVFQ-IMSSKSVPL---IHLEL-----E-----ASYFG---      | 699 |
| DOCK3_HUMAN | 569 | KEDYNGCPNIPSSLI FQRSTKESFFISTQLSSTKLTQNVLDLALLKWKAF | 618 |
| YL422_YEAST | 700 | RR-YN-I-N-PA--I-----T--NFLV---L-QTK---NVE-----F     | 721 |
| DOCK3_HUMAN | 619 | PDRIMDVLGRLR-H--VSGEEI--VKFLQDIL---DT-L--F-VILDD-N  | 655 |
| YL422_YEAST | 722 | -DQ-----QLKEHYSVTLKQLNNVSF-KDLLKHPDTILAHYLLLESVN    | 763 |
| DOCK3_HUMAN | 656 | --TEKYG---L--LVFQSLV-FIINL-L--RD-IKY-FH--FR-----    | 683 |
| YL422_YEAST | 764 | EATDKKGPSSSLPNIVFSEFVKF-LNLMLTHQENSRYWFNRLYKVKMSKE  | 812 |
| DOCK3_HUMAN | 684 | -----PV---MDTYI--QKH--F--AG-A-----LA----YK          | 701 |
| YL422_YEAST | 813 | LECPNVAPILIKHMTT-IFDRSHSSWTRTGTAI CRTILYIIVLAIGSSHS | 861 |

|             |      |                                                     |      |
|-------------|------|-----------------------------------------------------|------|
| DOCK3_HUMAN | 702  | -EL-----IRCL-KWYM--DCSAELIRQDHIQ--E---AMRALEYL---   | 733  |
| YL422_YEAST | 862  | DMPNPFSHFFRSLHKFLMLAD---EPMADQILLIESIPSM--LETMTNH   | 906  |
| DOCK3_HUMAN | 734  | FKFIVQS--R--I-LYSRATCGMEEEE--Q--F-RS-SI-QELFQSIRF-- | 769  |
| YL422_YEAST | 907  | CK--VEDLVRFAIGLFE--CC-QEKEMNQKMSRPLSVREEEYLYNTKFN   | 951  |
| DOCK3_HUMAN | 770  | VLSLDSRNSSETLLFTQAALLNSFPTIFDEL-LQMFTVQEVAEFVRGTLGS | 818  |
| YL422_YEAST | 952  | LLKL--INKK-VL--QNYLTNT-ESV-DKLRQLQ-F-LSKTLEWL--L-T  | 988  |
| DOCK3_HUMAN | 819  | MPST-----VHIGQSMDEVKLSIARTV--DSRLFSFSE--SRR-I-LL    | 856  |
| YL422_YEAST | 989  | -PYTPGGDKCFHV-ESLRLV--NSVFITIIED---YKF-DMLQRNLIRLL  | 1030 |
| DOCK3_HUMAN | 857  | PVVL--HHIHLHLRQ-QK-ELL----ICSGILGSIF--SIVKTSLEAD-   | 895  |
| YL422_YEAST | 1031 | P-YLCKSFVHLR-RYCKKARLMRPRRVFT-ML---FPREI-PCNYIPVDS  | 1073 |
| DOCK3_HUMAN | 896  | VMEEVEMMESLDDVLLQTLTIMSKSHAQEAVRGQRCPOCTAEI-TG--    | 942  |
| YL422_YEAST | 1074 | IVND-EVVVE---VLEL--LAII-----I---C-EIT-KIASSRF       | 1102 |
| DOCK3_HUMAN | 943  | -EYVSCLLS-LLRQMC--DTHFOHLLDNFQSKDEL-KE--F-LLK-IFCV  | 983  |
| YL422_YEAST | 1103 | PSYQS--FSEII-NLCDKDTLQ---SNFYSR-QITNENVYTIKTVF-L    | 1144 |
| DOCK3_HUMAN | 984  | FRNLKMKSVFP--RDWM-VMRL-LSNIIVTV--QYL----S-SALHKN    | 1022 |
| YL422_YEAST | 1145 | F---FKQDWFPGMK-WLGSALLGRSSLILLSLCKDYIIENNSPSP-SKE   | 1189 |
| DOCK3_HUMAN | 1023 | FTETDFDFKVVNSYFSLAVLFI-NQPSLQ-EL-ITSAKRKKILDKY---   | 1066 |
| YL422_YEAST | 1190 | -SEKRVDMRLWAEYVKV-ILLVSNHKASLTKLAI--PRKAV---YLIS    | 1232 |
| DOCK3_HUMAN | 1067 | GDMRVMMAYELFS-MWQNL--GEH-KIHFIPIGMIGPFLGVTLPV-QPE-- | 1109 |
| YL422_YEAST | 1233 | GDLKKISAY-ILNECWALATG-HYNTIYAK-KYG--LG-ALSDCQFELF   | 1276 |
| DOCK3_HUMAN | 1110 | VRN-IMI-PIF-----H-D-----MMDWEQRKN-G-NF-K-----Q-     | 1134 |
| YL422_YEAST | 1277 | VHNQFLIREIFIFAFHRHIDATRICKIL-W---GLGLNFWRIFGSLQP    | 1321 |
| DOCK3_HUMAN | 1135 | -VEAELIDKLDLDS--MVSEGK--GDESREL--F-SLLTLQFLGPPYSLLE | 1175 |
| YL422_YEAST | 1322 | AVNA-CIPELFSAYQI--GKLRLND--Y-ELERFVSC---LF--F--MMH  | 1358 |
| DOCK3_HUMAN | 1176 | KV-EQETW-----RE-TGISFVTSVTRLMERLLDYRDCMKG-EETEN     | 1214 |
| YL422_YEAST | 1359 | -VPDSDTFPPACMDFLRDLLG--FL-HIVN--E--I-YK--IPNQEEFDD  | 1397 |
| DOCK3_HUMAN | 1215 | KKIGCTV-NL-MNF-YKSEINKEEMYIRYIHKLC-DM--H-LQAEYNTA   | 1257 |
| YL422_YEAST | 1398 | DR---TARHIEM-FEYLLLEANRPELF---HKMIYDLFIHFIQKDKDFVQA | 1439 |
| DOCK3_HUMAN | 1258 | AFTL-LL---YCELLQWE--DRPLRE---F--LHYPSTQEWQRKEGLCRK  | 1296 |
| YL422_YEAST | 1440 | ALSLELLAGTYA---WDSND-TL-EAISFPPL--PEQSSFERKEYLLKE   | 1481 |
| DOCK3_HUMAN | 1297 | IIHYFNKG-KSWEFGIPLCREL--ACQYESL-YDYQSLSWIR-KMEASY   | 1341 |
| YL422_YEAST | 1482 | SARNFSRGQKP-EKALAVYKDLIKA--YDEINYDLNGLAFVHQI-AGIY   | 1527 |
| DOCK3_HUMAN | 1342 | DNIMEQ--QRLEPEFFRVGF--YGRKFPFFLRNKEYVCRGHDYERLEAFQ  | 1387 |
| YL422_YEAST | 1528 | TRL--QSIDRLVPTYFKVFSFMFGF--FPKSLRNKSFVFEGLPFEHITSMH | 1573 |
| DOCK3_HUMAN | 1388 | QRML-SEFPQAVAMQH-PN--H--PD-DAILQCD---AQYLQIYA-VTP-  | 1425 |
| YL422_YEAST | 1574 | DRLLRS-Y-----HGSNIVHSQEEVDMLLM-NPPMGKYIHW-ASVEPC    | 1613 |
| DOCK3_HUMAN | 1426 | --IPD-YVDVLQMDR---VPDRVKSFYRV-N-NVRKF---RYDR-PFHKG  | 1463 |

|                                                                                                |         |                                                     |             |      |       |            |
|------------------------------------------------------------------------------------------------|---------|-----------------------------------------------------|-------------|------|-------|------------|
| YL422_YEAST                                                                                    | 1614    | LSISDNY-N--SSDKKSSINNKVR-MY-IENRDLRFTFSNSR--RLPGA   | 1656        |      |       |            |
| DOCK3_HUMAN                                                                                    | 1464    | PKDKENEFKSLWIERTTL-TLTHSLPGISRWFEEVERRELVV-----SPL  | 1507        |      |       |            |
| YL422_YEAST                                                                                    | 1657    | VTD-----LWVEEYTYHTM-NTFPTL-----MNRSEIVKVKTKSLSP     | 1693        |      |       |            |
| DOCK3_HUMAN                                                                                    | 1508    | ENAI---QVVENKNQELRSLISQYQ-HKQV--HGNIN-L---LSMCLN--  | 1545        |      |       |            |
| YL422_YEAST                                                                                    | 1694    | ENAIRSLQV---KIQELYGL--ENMCNKTLKDHGDVNDLFTLS--TNIT   | 1736        |      |       |            |
| DOCK3_HUMAN                                                                                    | 1546    | GVIDAAVNGGIARYQEAFD---KDYINKHPGDAEKITQL--KELMQEQ    | 1589        |      |       |            |
| YL422_YEAST                                                                                    | 1737    | GTISAPVNGGISQY-KAFLEPSTSKQF-S--TDDLGRLT-LAFDEL----  | 1777        |      |       |            |
| DOCK3_HUMAN                                                                                    | 1590    | VHVLG-VGLAVH-EKRVHP--EMRPLHKKLIDQFQMMRASLYHE-F-PGL  | 1633        |      |       |            |
| YL422_YEAST                                                                                    | 1778    | VAVLGRC-LTLHAE-LL-PSKDLKPSH---D-L-LVR--LFEENFAEEI   | 1816        |      |       |            |
| DOCK3_HUMAN                                                                                    | 1634    | DK----LSPACSGTSTPRGNVLASHSPMSPESIKMTHRHSPNLMG--TG   | 1677        |      |       |            |
| YL422_YEAST                                                                                    | 1817    | ERYRSLTSEA--NRS--RNNMITAR-----I-ISHK-NP-NKKASFSG    | 1852        |      |       |            |
| DOCK3_HUMAN                                                                                    | 1678    | R-HSSSSLSHSHASSEAGNMVML--GDGSMGDAPEDLYHHMQLAYPNRYQ  | 1724        |      |       |            |
| YL422_YEAST                                                                                    | 1853    | RDHHTSG-SNH--SQ---FV-LEHSD-SFG--PNSL-----L-F-G-KY-  | 1883        |      |       |            |
| DOCK3_HUMAN                                                                                    | 1725    | GSVTNVSVLSSSQASPSLSSSTHAPSQMITSAOSS---ARGS-PSL-     | 1769        |      |       |            |
| YL422_YEAST                                                                                    | 1884    | --LTR--TLSHS--S-TTSSLDK--SG---IVSGTSTFLA-GSQPNTN    | 1919        |      |       |            |
| DOCK3_HUMAN                                                                                    | 1770    | PD--K--YRHA                                         | 1776        |      |       |            |
| YL422_YEAST                                                                                    | 1920    | TDSQHKKHDYSHS                                       | 1931        |      |       |            |
| -----                                                                                          |         |                                                     |             |      |       |            |
| Name 1: TOPI_HUMAN                                                                             |         |                                                     |             |      |       |            |
| Name 2: TOPI_YEAST                                                                             |         |                                                     |             |      |       |            |
| DNA topoisomerase 1 OS=Homo sapiens GN=TOP1 PE=1 SV=2                                          |         |                                                     |             |      |       |            |
| DNA topoisomerase 1 OS=Saccharomyces cerevisiae (strain ATCC 204508 / S288c) GN=TOP1 PE=1 SV=2 |         |                                                     |             |      |       |            |
| Needed for following interaction(s):                                                           |         |                                                     |             |      |       |            |
| yeast                                                                                          | genetic | TOPI_HUMAN                                          | MUS81_HUMAN | TOP1 | MUS81 | TOPI_YEAST |
| MUS81                                                                                          | YEAST   |                                                     |             |      |       |            |
| Length sequence 1:                                                                             |         | 765                                                 |             |      |       |            |
| Length sequence 2:                                                                             |         | 769                                                 |             |      |       |            |
| Sequence #1:                                                                                   |         | TOPI_HUMAN                                          |             |      |       |            |
| Sequence #2:                                                                                   |         | TOPI_YEAST                                          |             |      |       |            |
| Length #1:                                                                                     |         | 837                                                 |             |      |       |            |
| Length #2:                                                                                     |         | 837                                                 |             |      |       |            |
| Matrix:                                                                                        |         | BLOSUM62                                            |             |      |       |            |
| Gap open:                                                                                      |         | 2.0                                                 |             |      |       |            |
| Gap extend:                                                                                    |         | 1.0                                                 |             |      |       |            |
| Length:                                                                                        |         | 837                                                 |             |      |       |            |
| Identity:                                                                                      |         | 381/837 (45.52%)                                    |             |      |       |            |
| Similarity:                                                                                    |         | 493/837 (58.90%)                                    |             |      |       |            |
| Gaps:                                                                                          |         | 186/837 (22.22%)                                    |             |      |       |            |
| Score:                                                                                         |         | 1840.00                                             |             |      |       |            |
| TOPI_HUMAN                                                                                     | 43      | DREKSKH--SNSEHKD---SE--KHKH--EKEKTKHKDGSSEKHKDKHKD  |             |      |       | 83         |
| TOPI_YEAST                                                                                     | 5       | DASKVNHELSSDDDDVPLSQTLKRRKVASMNSASLQD-EAEPY-----D   |             |      |       | 48         |
| TOPI_HUMAN                                                                                     | 84      | RDKEKRKEEKVRASGDAKIKKEKENGFSPPQIKDEP-EDDGYFVP-PKE   |             |      |       | 131        |
| TOPI_YEAST                                                                                     | 49      | SD-----EAI--S---KISKKK---TK--KIKTEPVQSSS--LPSP--    |             |      |       | 77         |
| TOPI_HUMAN                                                                                     | 132     | DIKPLKRPREDDEDADYKPKKIKTE--DTK-KEKRRKLEEEEDGKLLKPKN |             |      |       | 178        |
| TOPI_YEAST                                                                                     | 78      | ---PAKK-----SATSKPKKIKKEDGDVVKVTKTK-K-EEQEN-E-KK-K- |             |      |       | 113        |
| TOPI_HUMAN                                                                                     | 179     | KDKDKKVPEDNKKKKPKKEEQKWKWWEERYPEG--IKWFLHKGVP       |             |      |       | 226        |

```

TOP1_YEAST      114 REEEEE--E-D---KK-AKEEEEEYKWWOKEN--EDDTIKWVTLKHNGVI      154
TOP1_HUMAN      227 FAPPYEPLPENVKFYDYGK-VMKLSPKAEVATFFAKML--DHEYTTKE-      272
TOP1_YEAST      155 FPPPYQPLPSHIKLYDGGKPV-DLPPQAEVAVGFFAALLESDH---AKNP      200
TOP1_HUMAN      273 IFRKNFFKDW-R--KEMTNEEKN-I-ITNLSKCDFTQMSQYFKAQTEARK      317
TOP1_YEAST      201 VFQKNFNFDFLQVLKE-SGGPLNGIEIKEFSCRDFTKMFDYFQLQKEQKK      249
TOP1_HUMAN      318 QMSKEEKLK-IKEENEKLLKE-YGFCIMDNHKERIANFKIEPPGLFRGRG      365
TOP1_YEAST      250 QLTSQEK-KQIRLEREK-FEEDYKFCELDGRREQVGNFKVEPPDLFRGRG      297
TOP1_HUMAN      366 NHPKMGMLKRRIMPEDIINCSDAKVPSPPGHWKWEVRHDNKVTVLWV      414
TOP1_YEAST      298 AHPKTGKLRKRRVNPEDIVLNLKSDAPVP-PAPEGHKWGEIRHDNTVQWLA      346
TOP1_HUMAN      415 SWTENIQSGSIKYIML--NPSSRIKGEKDWQKYETARRLKKCVDKIRNQY-      461
TOP1_YEAST      347 MWRENIFNSFKYVRLAAN-SS-LKGQSDYKFKFKARQLKSYIDAIRRDYT      394
TOP1_HUMAN      462 REDWKSKEM-KVRQRAVALYFIDKLALRAGNEKEEGEETADTVGCCSLRVE      510
TOP1_YEAST      395 R-NLKSVMLE-RQKAVAIYLIDVFWALRAGGKSEDE-ADTVGCCSLRYE      441
TOP1_HUMAN      511 HINLHPELDGQEQYVVEFDLFGKDSIRYYNKVPVEKRVFKNLQLFMEN--K      558
TOP1_YEAST      442 HVTLPK----PNTVI-FDFLGGKDSIRFYQEVVDKQVFNKLTIF-KRPPK      485
TOP1_HUMAN      559 QPEDDLFDRNLNTGILNKHLDLMEGLTAKVFRTYNASITLQOQLKELTAP      608
TOP1_YEAST      486 QPGHQFLDRDLPSILNKYLQNYMPGLTAKVFRTYNASKTMQDQL-DL-IP      533
TOP1_HUMAN      609 DE-NIPA-KILSYNRRANRAVAAILCNHQAPPK----TFEKS---MMNL--      647
TOP1_YEAST      534 NKGSV-AEKILKYNAANRTVAAILCNHQRTVTKGHAQTVEKANNRIQLEW      582
TOP1_HUMAN      648 Q---TK--I-----D-AKK-----EQ---LA--D-A---R---RDL-K-      666
TOP1_YEAST      583 QKIRCKRAILQLDKDLLKKEPKYFEEIDDLTKEDATIHKRIIDREIEKY      632
TOP1_HUMAN      667 SAK-A---D---AK--VM-----K-DAK---TK--KV--VE--      685
TOP1_YEAST      633 QRKFVRENDKRFKEEELLPESQLKEWLEKVEKKQEFKEKELKTGEVELK      682
TOP1_HUMAN      686 ----S-KK-KA-VQRLEEQLMKLEVQATDREENKQIALGTSKLNYLDPRI      728
TOP1_YEAST      683 SSWNSVEKIKAKVEKLEQRITQSSIQLKDKEENSQVSLGTSKINYIDPRL      732
TOP1_HUMAN      729 TVAWCKKGVPIEKIYNKTQREKFAWAIDMADEDYEF      765
TOP1_YEAST      733 SVVFCKKYDVPKIEKIFTKTLREKFKWAIESVDENWRF      769

```

```

-----
Name 1: H2B1M_HUMAN
Name 2: H2B1_YEAST

Histone H2B type 1-M OS=Homo sapiens GN=HIST1H2BM PE=1 SV=3
Histone H2B.1 OS=Saccharomyces cerevisiae (strain ATCC 204508 / S288c) GN=HTB1 P
E=1 SV=2

Needed for following interaction(s):
yeast genetic H2B1M_HUMAN RASK_HUMAN HIST1H2BM KRAS H2B1_YEA
ST IRA2_YEAST

Length sequence 1: 126
Length sequence 2: 131
Sequence #1: H2B1M_HUMAN
Sequence #2: H2B1_YEAST
Length #1: 127
Length #2: 127
Matrix: BLOSUM62

```

```

Gap open: 2.0
Gap extend: 1.0
Length: 127
Identity: 89/127 (70.08%)
Similarity: 104/127 (81.89%)
Gaps: 8/127 (6.30%)
Score: 450.00

H2B1M_HUMAN      3 E--PV-KSAPVPKK-GSKKAINKAQKKDGKKRKRSRKESYSVYVYKVLKQ      48
H2B1_YEAST      6 EKKPASK-APAEEKKPAAKT---STSTDGKKRKSARKETYSSYIYKVLKQ      51
H2B1M_HUMAN      49 VHPDTGISSKAMGIMNSFVNDIFERIAGEASRLAHYNKRSTITSREIQTA      98
H2B1_YEAST      52 THPDTGISQKSMSILNSFVNDIFERIAEASKLAAYNKKSTISAREIQTA      101
H2B1M_HUMAN      99 VRLLLPGELAKHAVSEGTKAVTKYTSS      125
H2B1_YEAST      102 VRLILPGELAKHAVSEGTRAVTKYSSS      128

-----
Name 1: EF1A2_HUMAN
Name 2: EF1A_YEAST

Elongation factor 1-alpha 2 OS=Homo sapiens GN=EF1A2 PE=1 SV=1
Elongation factor 1-alpha OS=Saccharomyces cerevisiae (strain ATCC 204508 / S288
c) GN=TEF1 PE=1 SV=1

Needed for following interaction(s):
yeast physical MUS81_HUMAN EF1A2_HUMAN MUS81 EEF1A2 MUS81_YE
AST EF1A_YEAST

Length sequence 1: 463
Length sequence 2: 458
Sequence #1: EF1A2_HUMAN
Sequence #2: EF1A_YEAST
Length #1: 466
Length #2: 466
Matrix: BLOSUM62
Gap open: 2.0
Gap extend: 1.0
Length: 466
Identity: 369/466 (79.18%)
Similarity: 414/466 (88.84%)
Gaps: 11/466 (2.36%)
Score: 1984.00

EF1A2_HUMAN      1 MGKEKTHINIVVIGHVDSGKSTTTGHLIYKCGGIDKRTIEKFEKEAAEMG      50
EF1A_YEAST      1 MGKEKSHINVVVIGHVDSGKSTTTGHLIYKCGGIDKRTIEKFEKEAAELG      50
EF1A2_HUMAN      51 KGSFKYAWVLDKLAERERGITIDISLWKFETTKYIITIIDAPGHRDFIK      100
EF1A_YEAST      51 KGSFKYAWVLDKLAERERGITIDIALWKFETPKYQVTVIDAPGHRDFIK      100
EF1A2_HUMAN      101 NMITGTSQADCAVLIVAAGVGEFEAGISKNGQTRHALLAYTLGVKQLIV      150
EF1A_YEAST      101 NMITGTSQADCAILLIAGGVGEFEAGISKDQTRHALLAFTLGVKQLIV      150
EF1A2_HUMAN      151 GVNKMDSTEPAYSEKRYDEIVKEVSAYIKKIGYNPATVPFVPISGWHGDN      200
EF1A_YEAST      151 AVNKMSVSK--WDESRFQEIIVKETSINFIKKVGYNPKTVFPVPISGWNGDN      198
EF1A2_HUMAN      201 MLEPSNPMPFWFKGW-KVERKEGNASGVSLLEALDTILPPTRPDKPLRLP      249
EF1A_YEAST      199 MIEATTNAPWYKGEK-ETKAGVVGKTLLEAIDAIEQPSRPTDKPLRLP      247
EF1A2_HUMAN      250 LQDVYKIGGIGTVPGRVETGILRPGMVVTFAPVNITTEVKSVEMHHEAL      299
EF1A_YEAST      248 LQDVYKIGGIGTVPGRVETGVIKPGMVVTFAPAGVTTTEVKSVEMHHEQL      297
EF1A2_HUMAN      300 SEALPGDNVGFNVKNVSKDIRRGNVCGDSKSDPPQEAQFTSQVILNH      349
EF1A_YEAST      298 EQQVPGDNVGFNVKNVSKDIRRGNVCGDAKNDPPKGCASFNATVIVLNH      347

```



|             |     |                                                     |     |
|-------------|-----|-----------------------------------------------------|-----|
| EF1A2_HUMAN | 350 | PGQISAGYSPVIDCHTAHIACKFAELKEKIDRRSGKKLEDNPKSLKSGDA  | 399 |
| EF1A_YEAST  | 348 | PGQISAGYSPVLDCHTAHIACRFDELLEKNDRRSGKKLEDHHPKFLKSGDA | 397 |
| EF1A2_HUMAN | 400 | AIVEMVPGKPMCVESFSQYPPPLGRFAVRDMRQTVAVGVIKNVEK--KSGG | 447 |
| EF1A_YEAST  | 398 | ALVKFVPSKPMCVFAFSEYPPPLGRFAVRDMRQTVAVGVIKSVDKTEK--- | 444 |
| EF1A2_HUMAN | 448 | AGKVTKSAQKAQKAGK                                    | 463 |
| EF1A_YEAST  | 445 | AAKVTKAAQKAAK--K                                    | 458 |

-----  
Name 1: GRP78\_HUMAN  
Name 2: GRP78\_YEAST

78 kDa glucose-regulated protein OS=Homo sapiens GN=HSPA5 PE=1 SV=2  
78 kDa glucose-regulated protein homolog OS=Saccharomyces cerevisiae (strain ATC C 204508 / S288c) GN=KAR2 PE=1 SV=1

Needed for following interaction(s):  
yeast physical RASK\_HUMAN GRP78\_HUMAN KRAS HSPA5 IRA2\_YEA  
ST GRP78\_YEAST

Length sequence 1: 654  
Length sequence 2: 682  
Sequence #1: GRP78\_HUMAN  
Sequence #2: GRP78\_YEAST  
Length #1: 687  
Length #2: 687  
Matrix: BLOSUM62  
Gap open: 2.0  
Gap extend: 1.0  
Length: 687  
Identity: 449/687 (65.36%)  
Similarity: 542/687 (78.89%)  
Gaps: 54/687 (7.86%)  
Score: 2279.00

|             |     |                                                      |     |
|-------------|-----|------------------------------------------------------|-----|
| GRP78_HUMAN | 3   | LSLVA-AM--LLL-L----SA---AR-AEEDDKKEDVGTVVIGIDLGTTY   | 39  |
| GRP78_YEAST | 15  | LSVVLYALFVVILPLQNSFHSSNVLVIRGA--DD-VENYGTVIGIDLGTTY  | 61  |
| GRP78_HUMAN | 40  | SCVGVFKNGRVEIIANDQGNRITPSYVAFTPEGERLIGDAAKNQLTSNPE   | 89  |
| GRP78_YEAST | 62  | SCVAVMKNGKTEILANEQGNRITPSYVAFT--DDERLIGDAAKNQVAANPQ  | 110 |
| GRP78_HUMAN | 90  | NTVFDKRLIG--RTWNDPSVQQDIKFLPFKVEKKTKPYIQVDIGGGQTK    | 138 |
| GRP78_YEAST | 111 | NTIFDIKRLIGLK--YNDRSVQDKIKHLPFNVNKDGKPAVEVSV--KGEKK  | 158 |
| GRP78_HUMAN | 139 | TFAPEEISAMVLTMKMKETAAYGLGKVKVTHAVVTVPAYFNDAQRQATKDAG | 188 |
| GRP78_YEAST | 159 | VFTPEEISGMILGKMKQIAEDYLGTKVTHAVVTVPAYFNDAQRQATKDAG   | 208 |
| GRP78_HUMAN | 189 | TIAGLNMRIINEPTAAAIAYGLDKREGEKNILVFDLGGGTFDVSLLTID    | 238 |
| GRP78_YEAST | 209 | TIAGLNVLRIVNEPTAAAIAYGLDKSDKEHQIIVYDLGGGTFDVSLLSIE   | 258 |
| GRP78_HUMAN | 239 | NGVFEVATNGDTHLGGEDFDQRVMEHFIKLYKKKTKGDKVRKD--NRAVQK  | 287 |
| GRP78_YEAST | 259 | NGVFEVQATSGDTHLGGEDFDYKIVRQLIKAFKKKHGIDV--SDNNKALAK  | 307 |
| GRP78_HUMAN | 288 | LRREVEKAKRALSSQHARIEIESFYEGEDFSETLTRAKFEELNMDLFRS    | 337 |
| GRP78_YEAST | 308 | LKREAEEKAKRALSSQMSTRIEIDSFVDGIDLSETLTRAKFEELNLDLFFK  | 357 |
| GRP78_HUMAN | 338 | TMKPVQKVLSDLLKSDIDEIVLVGGSTRIPKIQQLVKEFFNGKEPSRG     | 387 |
| GRP78_YEAST | 358 | TLKPVKEKVLQDSGLEKKVDVIVLVGGSTRIPKVQQLLESYFDGKKASKG   | 407 |
| GRP78_HUMAN | 388 | INPDEAVAYGAAVQAGVLSGDQDGT--DLVLLDVCPLTLGIETVGGVMTK   | 435 |

|             |     |                                                        |     |
|-------------|-----|--------------------------------------------------------|-----|
| GRP78_YEAST | 408 | INPDEAVAYGAAVQAGVLSGEE--GVEDIVLLDVALTLGIETVGGVMTK      | 455 |
| GRP78_HUMAN | 436 | LIPRNTVVPTTKKSQIFSTASDNQPTVTKVYEGERPLTKDNHLLGTFDLT     | 485 |
| GRP78_YEAST | 456 | LIKRNIAIPTTKKSQIFSTAVDNQPTVMKVVYEGERAMSKDNNLLGKFELT    | 505 |
| GRP78_HUMAN | 486 | GIPPAPRGVPOIEVTFEIDVNGILRVTAEDKGTGNKNK--ITITNDQNRLT    | 534 |
| GRP78_YEAST | 506 | GIPPAPRGVPOIEVTFALDANGILKVSATDKGTG--KSEITITNDKGRLT     | 554 |
| GRP78_HUMAN | 535 | PEEIERMVDNAEKFAEDKKLKERIDTRNELESYAYS LKNQI--GDKEKLG    | 583 |
| GRP78_YEAST | 555 | QEEIDRMVVEAEKFASEDASIKAKVESRNKLENYAHSLKNQVNGD---LG     | 601 |
| GRP78_HUMAN | 584 | GKLSSEDKET--MEKAVEEKIEWLESH--QDADI--EDFKAKKKE--LEEIVQP | 629 |
| GRP78_YEAST | 602 | EKLEEEEDKETLLD--AANDVLEWLDNDFETA--IAEDFD--EKFESLSKVAYP | 648 |
| GRP78_HUMAN | 630 | IISKLYGSA--GPPPTG-----E-E-DTA---EKDEL                  | 654 |
| GRP78_YEAST | 649 | ITSKLYGGADG---SGAADYDEDEDDDDGDFYEHDEL                  | 682 |

-----  
Name 1: PP2AB\_HUMAN  
Name 2: PP2A\_DROME

Serine/threonine-protein phosphatase 2A catalytic subunit beta isoform OS=Homo s  
apiens GN=PPP2CB PE=1 SV=1  
Serine/threonine-protein phosphatase PP2A OS=Drosophila melanogaster GN=mts PE=2  
SV=1

Needed for following interaction(s):  
fly genetic RASK\_HUMAN PP2AB\_HUMAN KRAS PPP2CB RAS1\_DROME  
PP2A\_DROME

Length sequence 1: 309  
Length sequence 2: 309  
Sequence #1: PP2AB\_HUMAN  
Sequence #2: PP2A\_DROME  
Length #1: 309  
Length #2: 309  
Matrix: BLOSUM62  
Gap open: 2.0  
Gap extend: 1.0  
Length: 309  
Identity: 292/309 (94.50%)  
Similarity: 303/309 (98.06%)  
Gaps: 0/309 (0.00%)  
Score: 1615.00

|             |     |                                                    |     |
|-------------|-----|----------------------------------------------------|-----|
| PP2AB_HUMAN | 1   | MDDKAFTKELDQWVEQLNECKQLNENQVRTLCEKAKEILTKESNVQEVRC | 50  |
| PP2A_DROME  | 1   | MEDKATTKDLQWIEQLNECNQLTETQVRTLCDKAKEILSKESNVQEVKC  | 50  |
| PP2AB_HUMAN | 51  | PVTVCGDVHGQFHDLMELFRIGGKSPDNTYLFMGDYVDRGYYSVETVTL  | 100 |
| PP2A_DROME  | 51  | PVTVCGDVHGQFHDLMELFRIGGKSPDNTYLFMGDYVDRGYYSVETVTL  | 100 |
| PP2AB_HUMAN | 101 | VALKVRYPYRITILRGNHESRQITQVYGFYDECLRKYGNANVWKYFTDLF | 150 |
| PP2A_DROME  | 101 | VALKVRYPYRITILRGNHESRQITQVYGFYDECLRKYGNANVWKYFTDLF | 150 |
| PP2AB_HUMAN | 151 | DYLPLTALVDGQIFCLHGGLSPSIDLTHIRALDRLQVPEHGMCDLLW    | 200 |
| PP2A_DROME  | 151 | DYLPLTALVDGQIFCLHGGLSPSIDLTHIRALDRLQVPEHGMCDLLW    | 200 |
| PP2AB_HUMAN | 201 | SDPDDRGGWGISPRGAGYTFGQDISETFNHNGLTLVSRAHQLVMEGYNW  | 250 |
| PP2A_DROME  | 201 | SDPDDRGGWGISPRGAGYTFGQDISETFNNTNGLTLVSRAHQLVMEGYNW | 250 |
| PP2AB_HUMAN | 251 | CHDRNVVTFISAPNYCYRCGNQAAMELDDTLKYSFLQFDPAPRRGEPHV  | 300 |
| PP2A_DROME  | 251 | CHDRNVVTFISAPNYCYRCGNQAAMELDDSLKFSFLQFDPAPRRGEPHV  | 300 |

PP2AB\_HUMAN 301 TRRTPDYFL 309  
PP2A\_DROME 301 TRRTPDYFL 309  
-----  
Name 1: VPS25\_HUMAN  
Name 2: Q9U354\_CAEEEL  
Vacuolar protein-sorting-associated protein 25 OS=Homo sapiens GN=VPS25 PE=1 SV=1  
Protein W02A11.2, confirmed by transcript evidence OS=Caenorhabditis elegans GN=vps-25 PE=2 SV=1  
Needed for following interaction(s):  
worm genetic RASK\_HUMAN VPS25\_HUMAN KRAS VPS25 LET60\_CAEEEL Q9U354\_CAEEEL  
Length sequence 1: 176  
Length sequence 2: 183  
Sequence #1: VPS25\_HUMAN  
Sequence #2: Q9U354\_CAEEEL  
Length #1: 184  
Length #2: 184  
Matrix: BLOSUM62  
Gap open: 2.0  
Gap extend: 1.0  
Length: 184  
Identity: 81/184 (44.02%)  
Similarity: 120/184 (65.22%)  
Gaps: 19/184 (10.33%)  
Score: 459.00  
VPS25\_HUMAN 2 AMSFEWPQYRFPFFFTLQPNVDTRQKQLAAWCSLVLSFCRLH-KQSSMT 50  
Q9U354\_CAEEEL 8 ASAFKWPWQYDFPFFFTIQKSLNTRKQLEAWARLVIDYAQ-HNKIYSLD 56  
VPS25\_HUMAN 51 VMEAQESPLFNQKLVKQKLPVESIQIVLE--ELRKKGNL-EWLDKSKSSF 97  
Q9U354\_CAEEEL 57 IAEATTSELFNQKLNRRLLSTDGVNTVLQYLE-QKK--LIEFTDNGRTRF 103  
VPS25\_HUMAN 98 LIMWRRPEEWGKLIYQW-VSRSGQN---NSVFTLYELTNGEDTEDEEFHG 143  
Q9U354\_CAEEEL 104 HIFWRRPDVWAMNIYQWAV---ENAFINTPLTLYEITHGDDTTNESFHN 149  
VPS25\_HUMAN 144 LD-EATLLRALQALQOEKAEIITV-SDGRGVKF 175  
Q9U354\_CAEEEL 150 LERE-ILMKALTCLEEQRRALMNIIGGDNEGKVF 182  
-----  
Name 1: RL17\_HUMAN  
Name 2: RL17B\_YEAST  
60S ribosomal protein L17 OS=Homo sapiens GN=RPL17 PE=1 SV=3  
60S ribosomal protein L17-B OS=Saccharomyces cerevisiae (strain ATCC 204508 / S288c) GN=RPL17B PE=1 SV=2  
Needed for following interaction(s):  
yeast genetic RASK\_HUMAN RL17\_HUMAN KRAS RPL17 IRA2\_YEAST RL17B\_YEAST  
Length sequence 1: 184  
Length sequence 2: 184  
Sequence #1: RL17\_HUMAN  
Sequence #2: RL17B\_YEAST  
Length #1: 191  
Length #2: 191  
Matrix: BLOSUM62  
Gap open: 2.0  
Gap extend: 1.0  
Length: 191  
Identity: 104/191 (54.45%)  
Similarity: 131/191 (68.59%)  
Gaps: 16/191 (8.38%)  
Score: 532.00

RL17\_HUMAN 1 MVRYSLDPENPTKSCKSRGNSNLRVHFKNTRETAQAQKGMHIRKATKYLD 50  
RL17B\_YEAST 1 MARYGATSTNPAKSASARGSYLRVFSFKNTRETAQAINGWELTKAQKYL-D 49  
RL17\_HUMAN 51 -VTL--QKQCVFRRYNGGVGRCAQAKQGWGTQGRWPKKSAEFLHMLKN 97  
RL17B\_YEAST 50 QV-LDHQR-AIPFRFRNSSIGRTAQGKFEFGVTKARWPAKSVKQVQGLLQN 97  
RL17\_HUMAN 98 AESNAELKGLDVSIVIEHIQVKNKAPKRRRTYRAHGRINPYMSSPCHIE 147  
RL17B\_YEAST 98 AAANAEEKGLDQKLVVSHIQVQAPKQRRRTYRAHGRINPYMSSPCHIE 147  
RL17\_HUMAN 148 MILTEKEQIVPKPEEEVAQKK--KI-S-QK-KLKKQK-LMA 182  
RL17B\_YEAST 148 LVTTEKEEAVAK---AAEKKVRLTSRQRGRIAAQKRISA 184  
-----  
Name 1: MP2K1\_HUMAN  
Name 2: DSOR1\_DROME  
Dual specificity mitogen-activated protein kinase kinase 1 OS=Homo sapiens GN=MA  
P2K1 PE=1 SV=2  
Dual specificity mitogen-activated protein kinase kinase dSOR1 OS=Drosophila mel  
anogaster GN=Dsor1 PE=2 SV=2  
Needed for following interaction(s):  
fly genetic RASK\_HUMAN MP2K1\_HUMAN KRAS MAP2K1 RAS1\_DROME DSOR1\_DROME  
Length sequence 1: 393  
Length sequence 2: 396  
Sequence #1: MP2K1\_HUMAN  
Sequence #2: DSOR1\_DROME  
Length #1: 396  
Length #2: 396  
Matrix: BLOSUM62  
Gap open: 2.0  
Gap extend: 1.0  
Length: 396  
Identity: 253/396 (63.89%)  
Similarity: 307/396 (77.53%)  
Gaps: 41/396 (10.35%)  
Score: 1325.00  
MP2K1\_HUMAN 6 PTPIQLNP--APDG---SAVNGTSSAETNLEALQKLELEL-D-EQQR 47  
DSOR1\_DROME 26 PTP----PFKTPSGTDTHSLL-G--KPKTSDALTFETLEGLDMGDTE--R 66  
MP2K1\_HUMAN 48 KRLEAFLTQKQKVGELKDDDFEIKISELGAGNGGVFKVSHKPSGLVMARK 97  
DSOR1\_DROME 67 KRIKMFLSQKEKIGELSDLEDLEKLGSGNGGVVMKVRHHTHLMARK 116  
MP2K1\_HUMAN 98 LIHLEIKPAIRNQIIRELQVLHECNSPYIVGFYGFYSDGEISICMEHMD 147  
DSOR1\_DROME 117 LIHLEVKPAIKQILRELKVLHECNFPHIVGFYGFYSDGEISICMEYMD 166  
MP2K1\_HUMAN 148 GGSLDQVLKAGRIPEQILGKVSIAVIKGLTYLREKHKIMHRDVKPSNIL 197  
DSOR1\_DROME 167 GGSLDLILKRAGRIPESILGRITLAVLKGSLYLRDNHAIHRDVKPSNIL 216  
MP2K1\_HUMAN 198 VNSRGEIKLDFGVSGQLIDSMANSFVGTGRSYMSPERLQGTHTYSVQSDIW 247  
DSOR1\_DROME 217 VNSSGEIKICDFGVSGQLIDSMANSFVGTGRSYMSPERLQGTHTYSVQSDIW 266  
MP2K1\_HUMAN 248 SMGLSLVEMAVGRYPIDPPD-AKELELMFGCQVEGDAETPPRPTGRPR 296  
DSOR1\_DROME 267 SLGLSLVEMAIGMYPIDPPNTA-TLESIF----ADNAE-----ES-GQP 304  
MP2K1\_HUMAN 297 LSSYGMDSRP-PMAlFELLDYIVNEPPPKLPSGVFSLEFQDFVNKCLIKN 345  
DSOR1\_DROME 305 --T---D-EPRAMAlFELLDYIVNEPPPKLEHKIFSTEFKDFVDICLKKQ 348  
MP2K1\_HUMAN 346 PAERADLKLQMLVHAFIKRSDAEVDFAGWLCSTIGLNQPSPTP---T 388

DSOR1\_DROME 349 PDERADLKTLLSHPWIRKAELEEVDISGWVCKTMDL-PPSTPKRNT 393

Name 1: RU2A\_HUMAN
Name 2: RU2A\_YEAST

U2 small nuclear ribonucleoprotein A' OS=Homo sapiens GN=SNRPA1 PE=1 SV=2
U2 small nuclear ribonucleoprotein A' OS=Saccharomyces cerevisiae (strain ATCC 204508 / S288c) GN=LEA1 PE=1 SV=1

Needed for following interaction(s):
yeast genetic RASK\_HUMAN RU2A\_HUMAN KRAS SNRPA1 IRA2\_YEAST
RU2A\_YEAST

Length sequence 1: 255
Length sequence 2: 238
Sequence #1: RU2A\_HUMAN
Sequence #2: RU2A\_YEAST
Length #1: 282
Length #2: 282
Matrix: BLOSUM62
Gap open: 2.0
Gap extend: 1.0
Length: 282
Identity: 93/282 (32.98%)
Similarity: 130/282 (46.10%)
Gaps: 96/282 (34.04%)
Score: 329.00

RU2A\_HUMAN 1 MVKLTAEI-IEQAAQ-YT---NA---VRD-----RELDLR--GYKIP-VI 34
RU2A\_YEAST 1 M-KFTPSIVID-APQYYVDHFNKYNV-DKCVILRDLQLETDSSEMPSSL 47
RU2A\_HUMAN 35 ENLGATLDQFDA-I-DFSDNE-IRKLDGFP-LLRR--LKTLV-NNNRIC 77
RU2A\_YEAST 48 KHL--T--K-PTHILDLTNNDLI--M--IPDLSRRDDIHTLLGRNN-I- 86
RU2A\_HUMAN 78 RIGEGLD-QALPCL-TE-LILTNNSL--VELGDLDP--A--SLKSLTYL 118
RU2A\_YEAST 87 -V-E-VDRLLP-MNVQNLTLNNSIRFFE--DLQRLRRAPRTLKNLT-L 129
RU2A\_HUMAN 119 SILRNPVTNKKH---YRLYVIYK-VPQVRVLDFOKVKLKERQEAEM-F- 162
RU2A\_YEAST 130 -I-GNQC---HLANYREHVL-RLVPHLETDFQNVTAERKSA--MSFP 171
RU2A\_HUMAN 163 K---GKR-G-AQLA-KDIARRSKT---FNPAGALPTDKKKGSPGDVE- 202
RU2A\_YEAST 172 RQADGDTLGPVNTAIRDNGSRDKTMEIMN---LVVSKM----T---VER 210
RU2A\_HUMAN 203 --AIKNAIANASTLAEVERL-KGLLQSGQIPG 231
RU2A\_YEAST 211 RNELKKQLAEATSLEEIARLEK-LL-SG---G 237

Name 1: TAF6\_HUMAN
Name 2: TAF6\_YEAST

Transcription initiation factor TFIID subunit 6 OS=Homo sapiens GN=TAF6 PE=1 SV=1
Transcription initiation factor TFIID subunit 6 OS=Saccharomyces cerevisiae (strain ATCC 204508 / S288c) GN=TAF6 PE=1 SV=1

Needed for following interaction(s):
yeast genetic TAF6\_HUMAN BLM\_HUMAN TAF6 BLM TAF6\_YEAST
SGS1\_YEAST

Length sequence 1: 677
Length sequence 2: 516
Sequence #1: TAF6\_HUMAN
Sequence #2: TAF6\_YEAST
Length #1: 608
Length #2: 608
Matrix: BLOSUM62

Gap open: 2.0
Gap extend: 1.0
Length: 608
Identity: 197/608 (32.40%)
Similarity: 290/608 (47.70%)
Gaps: 182/608 (29.93%)
Score: 791.00

TAF6\_HUMAN 1 MAEEKKLKLSNTV-LPSESMKVVAESMGIAIQEETCQLLT-DEVSYRIK 48
TAF6\_YEAST 1 MSTQQQ---SYTIWSPQDTVKDVAESLGLEINDDVLKALAMD-VEYRIL 46
TAF6\_HUMAN 49 EIAQDALKF-MHMGKRQKLTTSIDYALK-LKNVEPLYGFH-AQEF---I 92
TAF6\_YEAST 47 EIIEQAVKFKRH-SKRDVLTDDVSKALRVL-NVEPLYGYDGEVKNKAV 94
TAF6\_HUMAN 93 PF-RF-ASGGGRELIFY-EEKEVDLSD-IINTPLPRVP-LDVCLKAHWLS 137
TAF6\_YEAST 95 SFSKVNTS-GGQSVY-YLDEEVDVF-DRLINEPLPQVPRPLPT-FTTHWLA 140
TAF6\_HUMAN 138 IEGCQPAIPENP-----PP---A---PKEQQKAEATEPLKS--AK 169
TAF6\_YEAST 141 VEGVQPAIIQPNLNDIRVSQPPFIRGAIVTALNDSLQ-T-PVTSTTAS 188
TAF6\_HUMAN 170 PGQEED-GP---LKG-K-GQGATTADGKGEKKAPPLLEGAPLRRLKPRSI 213
TAF6\_YEAST 189 -ASVTDGTGASQHLNPKVGPQ--NT-----EVK-----PL-VK---- 216
TAF6\_HUMAN 214 HELSVEQQLYY-KEI-T-EACVGS-C-EA---KRAEALQSIATDPGLYQ 254
TAF6\_YEAST 217 HVLSKELQIYFNKVI STLTA--KSQADEAAQHMKA-ALTSRLRDSGLHQ 263
TAF6\_HUMAN 255 MLPRFSTFISEGVRVNVVQN--NLALLIYLMRMVKALMDNPT-LYLEKYV 301
TAF6\_YEAST 264 LVPYFIQFIAE---QITQNLSDLQLLTILEMIYSLLSN-TSIFLDPYI 308
TAF6\_HUMAN 302 HELIPAVMTCIVSRQL--CLRP-DVDN---H-W----ALRDFAAARLVA 338
TAF6\_YEAST 309 HSLMPSILTLKAKLGG--SPKD-DSPQEIHEFLERTNALRDFAAASLLD 355
TAF6\_HUMAN 339 QICKHFSTTTNNIQSRIITKFTKSWVD-EKTPWTTTRYGSIAGLA--ELGH 385
TAF6\_YEAST 356 YVLKFFQAYKSLKPRVTRTLKTFDLINRV-FGTYGCLKGVSVLE-G- 402
TAF6\_HUMAN 386 DVIKTLI--L---PRL--QOEG---ERIRSVL--D-GPVSNI---D-RI 418
TAF6\_YEAST 403 ESIRFFLGNLNNWARLVFNESGITLNDNIEHLNDDSNPRTKFTKEETQI 452
TAF6\_HUMAN 419 GADHVQSLLLKHCAPVLAK-LRPPPDNDQDAYRAEFGSLGPLLCSQVVKAR 467
TAF6\_YEAST 453 LVDTVISALL---VLKDL---P---DLY--E-GK-G-----E--K-- 478
TAF6\_HUMAN 468 AQAALQAQVNRITTLITQPRPTLTLTSQAPQGPRTPG--LLKVPGSIAL 515
TAF6\_YEAST 479 -----V-----T-DEDKEKL-LERC---GV-TIGFHILK-RDD-A- 505
TAF6\_HUMAN 516 PVQTLVSA 523
TAF6\_YEAST 506 --KELISA 511

Name 1: LTK\_HUMAN
Name 2: IRE1\_YEAST

Leukocyte tyrosine kinase receptor OS=Homo sapiens GN=LTK PE=1 SV=3
Serine/threonine-protein kinase/endoribonuclease IRE1 OS=Saccharomyces cerevisiae (strain ATCC 204508 / S288c) GN=IRE1 PE=1 SV=2

Needed for following interaction(s):
yeast physical PTTG1\_HUMAN LTK\_HUMAN PTTG1 LTK SECU\_YEA
ST IRE1\_YEAST

Length sequence 1: 864
Length sequence 2: 1115

Sequence #1: LTK\_HUMAN  
Sequence #2: IRE1\_YEAST  
Length #1: 1216  
Length #2: 1216  
Matrix: BLOSUM62  
Gap open: 2.0  
Gap extend: 1.0  
Length: 1216  
Identity: 299/1216 (24.59%)  
Similarity: 452/1216 (37.17%)  
Gaps: 546/1216 (44.90%)  
Score: 881.00

```

LTK_HUMAN      7 LLVW-FGAAGAIL-CSSP-GS-----Q---E---T---F---L-R--S   31
                |||. | .:|: ||. | . | | | | | | | | | | | | | | | |
IRE1_YEAST     13 LLVCFV---SSIIISCSIPLSSRTSRRQIIVEDEVASTKKLNFNYGVDRKIN  59
                |||. | .:|: ||. | . | | | | | | | | | | | | | | | |
LTK_HUMAN     32 SPLPLASPSPR--D--P--KVSA-P-PSILEPA-S-PLNSPG--TEGSWL   69
                |||. | .:|: ||. | . | | | | | | | | | | | | | | | |
IRE1_YEAST     60 SPIP-A---PRTTEGLPNMKLSSYPTNLLNTADNRRANKKGRRAANS-I  104
                |||. | .:|: ||. | . | | | | | | | | | | | | | | | |
LTK_HUMAN     70 FSTCGASGRHGP-TQTQC--DGAYAGTS-VVVT--V-GAAGQL-----R   106
                |||. | .:|: ||. | . | | | | | | | | | | | | | | | |
IRE1_YEAST    105 -SV-----PYLENRSLNE---LSLSDILIAADVEG--G-LHAVDRRN  139
                |||. | .:|: ||. | . | | | | | | | | | | | | | | | |
LTK_HUMAN    107 G-VQLWRV-P-G-----PG--Q-Y--L-L-ISAYGAAGGKGAKN--HL   136
                |||. | .:|: ||. | . | | | | | | | | | | | | | | | |
IRE1_YEAST    140 GHI-IWSIEPENFQPLIEIQEPERSLEYETLIEPF---GDG--NIYYF  182
                |||. | .:|: ||. | . | | | | | | | | | | | | | | | |
LTK_HUMAN    137 SRAH-G-----V--FVSAIFS-LGL-----G-----ESLY----  157
                |||. | .:|: ||. | . | | | | | | | | | | | | | | | |
IRE1_YEAST    183 N-AHQGLQKPLSIRQLVST--SPLHLKTNIVVNDSGKIVEDEKQVYTGSM  229
                |||. | .:|: ||. | . | | | | | | | | | | | | | | | |
LTK_HUMAN    158 --IL--VGQ-QGE--DAC-PG-----GSPESQLV-CLGESRAV---E-E  188
                |||. | .:|: ||. | . | | | | | | | | | | | | | | | |
IRE1_YEAST    230 RTIMYTTINMLNGEIIISAFGPGSKNGYFGS-QS--VDCSPEEK--IKLQECE  275
                |||. | .:|: ||. | . | | | | | | | | | | | | | | | |
LTK_HUMAN    189 HAAMDG-S--E-GVPGSRRWAGGGGGGGGATY-V-FRV-RAGELE-PL-L  229
                |||. | .:|: ||. | . | | | | | | | | | | | | | | | |
IRE1_YEAST    276 NMIIVIGKTIIFELGI--HS--Y-----DGASYNVTYSTWQONVLDVPLAL  315
                |||. | .:|: ||. | . | | | | | | | | | | | | | | | |
LTK_HUMAN    230 V-AAGGGGRAYLRP-RDRGRTQASPEKLENRSEAPGSGRGAAGGGGGW  277
                |||. | .:|: ||. | . | | | | | | | | | | | | | | | |
IRE1_YEAST    316 QNTFSKDGMC-IAPFRDKS-LLAS-D-LDFRI-A-----R-----W  346
                |||. | .:|: ||. | . | | | | | | | | | | | | | | | |
LTK_HUMAN    278 TSRAPS-PQ--AG----RSLQ--EG--A-----EGG-QGCS--EAW--A  305
                |||. | .:|: ||. | . | | | | | | | | | | | | | | | |
IRE1_YEAST    347 VS--PTPFGIIVGLFVFNLDLRTNENILVPHFPFNGDHESSISNKVYLDQ  394
                |||. | .:|: ||. | . | | | | | | | | | | | | | | | |
LTK_HUMAN    306 T--LGW-A-AAGGFGGGGGAC-TAG-GGGGGRYRGDASETDNLW-ADG--  346
                |||. | .:|: ||. | . | | | | | | | | | | | | | | | |
IRE1_YEAST    395 TSNLSWFALSSQNF---PSLVESAPI---SRY----AS-SDR-WRVSSIF  432
                |||. | .:|: ||. | . | | | | | | | | | | | | | | | |
LTK_HUMAN    347 EDGVSF-----IHP--SSEFLQPLAVTENHGEVEIRRH-LNCSS--CP  385
                |||. | .:|: ||. | . | | | | | | | | | | | | | | | |
IRE1_YEAST    433 EDETLFKNAIMGVHQIYNNE-Y-DHL--YENY---E-KTNSLDTTHKYPP  474
                |||. | .:|: ||. | . | | | | | | | | | | | | | | | |
LTK_HUMAN    386 L-----RDC-QWQAEI-QLAECLCPGEMELA----V-DNVT--CMDL  418
                |||. | .:|: ||. | . | | | | | | | | | | | | | | | |
IRE1_YEAST    475 LMIDSSVDTTDLHQ--NNEMNSLKEYMSPEDLE-AYRKKIHEQISRE-LD-  520
                |||. | .:|: ||. | . | | | | | | | | | | | | | | | |
LTK_HUMAN    419 HKPPGPLVL---MV-AVVATST-LSL-LMV-CGVL----IL----VKQK  452
                |||. | .:|: ||. | . | | | | | | | | | | | | | | | |
IRE1_YEAST    521 EKNQNSLLLKFGSLVYRIIETGVFL-LFLIFCAILQRFKILPPLYVLLS  569
                |||. | .:|: ||. | . | | | | | | | | | | | | | | | |
LTK_HUMAN    453 KWQG-LQEMRLPSPPELELSK-LR--TSA--IRTAPNPY--YC--QV---G  489
                |||. | .:|: ||. | . | | | | | | | | | | | | | | | |
IRE1_YEAST    570 K-IGFMPKEKEIPI--VE-SKSLNCPSSSENV-T--KPFDMKSGKQVVFEG  612
                |||. | .:|: ||. | . | | | | | | | | | | | | | | | |
LTK_HUMAN    490 -L--G-----PA-----QSWPL-----PPG-----VTE  504
                |||. | .:|: ||. | . | | | | | | | | | | | | | | | |
IRE1_YEAST    613 AVNDGSLKSEKDNDDADEDEKSLDLTTEKKKRRGRSGGKGRKSRIAN  662
                |||. | .:|: ||. | . | | | | | | | | | | | | | | | |
LTK_HUMAN    505 VSPANV--TL--L----RALGHGAFGE-VYEGLVIGLPGDSSPLQVAIK-  544
                |||. | .:|: ||. | . | | | | | | | | | | | | | | | |

```

```

IRE1_YEAST     663 I-P-NFEQSLKNLVSEKILGYGSSGTVVVFQG---SFQG--RP--VAVKR  703
                |||. | .:|: ||. | . | | | | | | | | | | | | | | | |
LTK_HUMAN     545 TLPELCSPQDELDFLME-ALII-SKFRHQINVR--CVGLSLRATPR-L-I  588
                |||. | .:|: ||. | . | | | | | | | | | | | | | | | |
IRE1_YEAST     704 MLIDFC---D-I-ALMEIKLLTESD-DHPNVIRYYC---S-ETTDRLFYI  743
                |||. | .:|: ||. | . | | | | | | | | | | | | | | | |
LTK_HUMAN     589 LLEL--MSGGDM-KSFLRH-SRPHLG-QP--SPLVMRDLLQLAQDIAQG-  630
                |||. | .:|: ||. | . | | | | | | | | | | | | | | | |
IRE1_YEAST     744 ALELCNLNQLDLVES--KNVSDENLKLQKEYNP-I--SLLR--Q-IASGV  785
                |||. | .:|: ||. | . | | | | | | | | | | | | | | | |
LTK_HUMAN     631 CHYLEENH---FIIHRDIAARNCLLS-----CA----G-PS-RVAKIGDFG  666
                |||. | .:|: ||. | . | | | | | | | | | | | | | | | |
IRE1_YEAST     786 AH-L---HSLKIIHRDLKPQNILVSTSSRFTADQQTGAENLRIL-ISDFG  830
                |||. | .:|: ||. | . | | | | | | | | | | | | | | | |
LTK_HUMAN     667 MAR--DIYRASYYRRGRDRALL--P--VK-WMPPEAFLE---G---IFT-  701
                |||. | .:|: ||. | . | | | | | | | | | | | | | | | |
IRE1_YEAST     831 LCKKLDGQSSF--RTN---LNNPSGTSGWRAPE-LLEESNNLQCVETE  874
                |||. | .:|: ||. | . | | | | | | | | | | | | | | | |
LTK_HUMAN     702 ---SK-T---DS-WS-FGV---L---LWEIFSLG---Y-M-----PYP  725
                |||. | .:|: ||. | . | | | | | | | | | | | | | | | |
IRE1_YEAST     875 HSSSRHTVVSSDSFYDPPF-TKRRLTRSI-DIFSMGCVFYIILSKGKHPF-  921
                |||. | .:|: ||. | . | | | | | | | | | | | | | | | |
LTK_HUMAN     726 G-RTNQEVLDVAVGG--GRMDPPRGCPGPVY-R--I--MT---QCWQHE  763
                |||. | .:|: ||. | . | | | | | | | | | | | | | | | |
IRE1_YEAST     922 GDKYSRE-SN-IIRGIFS-LDEMK-C---LHDRSLIAEATDLISQIMIDHD  964
                |||. | .:|: ||. | . | | | | | | | | | | | | | | | |
LTK_HUMAN     764 PEL-RPSFA-SILERLQYCTQDPDVLNLSLLP---ME-LGPTPEEEGTSG  806
                |||. | .:|: ||. | . | | | | | | | | | | | | | | | |
IRE1_YEAST     965 P-LKRPT-AMKVL-R--H---P--L--FWPKSKKLEFL--L---K-VS-  994
                |||. | .:|: ||. | . | | | | | | | | | | | | | | | |
LTK_HUMAN     807 LGNRSLECL--RPPQPQELSPEKL-KSW-GGS---PLGPWLSSGLKPL-  847
                |||. | .:|: ||. | . | | | | | | | | | | | | | | | |
IRE1_YEAST     995 --DR-LE-IENRDP-PSAL----LMK-FDAGSDFVIPSQDW--T-VK-FD  1030
                |||. | .:|: ||. | . | | | | | | | | | | | | | | | |
LTK_HUMAN     848 KSRGLQPQNLWNPTYR      863
                |||. | .:|: ||. | . | | | | | | | | | | | | | | | |
IRE1_YEAST    1031 KT--FM-DNL--ERYR      1041
                |||. | .:|: ||. | . | | | | | | | | | | | | | | | |
-----
Name 1: FBXW7_HUMAN
Name 2: CDC4_YEAST

F-box/WD repeat-containing protein 7 OS=Homo sapiens GN=FBXW7 PE=1 SV=1
Cell division control protein 4 OS=Saccharomyces cerevisiae (strain ATCC 204508 / S288c) GN=CDC4 PE=1 SV=2

Needed for following interaction(s):
yeast      genetic FBXW7_HUMAN      PTTG1_HUMAN      FBXW7      PTTG1      CDC4_YEAST
SECU_YEAST

Length sequence 1:      707
Length sequence 2:      779
Sequence #1: FBXW7_HUMAN
Sequence #2: CDC4_YEAST
Length #1: 851
Length #2: 851
Matrix: BLOSUM62
Gap open: 2.0
Gap extend: 1.0
Length: 851
Identity: 252/851 (29.61%)
Similarity: 396/851 (46.53%)
Gaps: 279/851 (32.78%)
Score: 1054.00

FBXW7_HUMAN      5 LLSVSGSKRRR--T-GGLRGNPSSSQ-VDEEQMNRVVEEE-QQQQLRQEE  50
                |||. | .:|: ||. | . | | | | | | | | | | | | | | | |
CDC4_YEAST      26 IASSGSVTALVTAAGTHR--NSSTAKTVETED-G---EEDIDEYQ-RKR--  67
                |||. | .:|: ||. | . | | | | | | | | | | | | | | | |
FBXW7_HUMAN      51 EHTARNGEVVGVEPRPGGQNSQQGLEENNRFI-SVD-EDSSGNQEEQ  98
                |||. | .:|: ||. | . | | | | | | | | | | | | | | | |
CDC4_YEAST      68 --AA--GS--G-ESTP-ERSDFK--RVKHDNHNKTLHPVNLQ-NTG-AASV  105
                |||. | .:|: ||. | . | | | | | | | | | | | | | | | |

```

|             |     |                                                     |     |
|-------------|-----|-----------------------------------------------------|-----|
| FBXW7_HUMAN | 99  | EEDEEHAGEQD--EEDEEEEMDQESDDFDQS--DDSSREDEHHTNSVINS  | 146 |
| CDC4_YEAST  | 106 | DNDGLH-NLTDISND--AEKL-----L-MSVDDGSAAP--S-TLSV-N-   | 140 |
| FBXW7_HUMAN | 147 | SSIIVLDPVHQLSSPFYTKTKMKRKLHDHGE---VRSFSLGKPKCKVSE   | 192 |
| CDC4_YEAST  | 141 | MGVAS---HNVAAP--T-TVN-AATIT-GSDVSNVNSATI-NNP--MEE   | 179 |
| FBXW7_HUMAN | 193 | YTSTTGLVPCS--A-TP-TTFGDL-RAA----NGQG-----QQRRTISV   | 228 |
| CDC4_YEAST  | 180 | -----GALPLSPTASSPGTT-TPLAKTTKTINNNNIADLIESKDSIIS-   | 222 |
| FBXW7_HUMAN | 229 | QPPTGLQEWL--KMFQWSG--PE---K-LL----A-LD--ELID-SCEP   | 262 |
| CDC4_YEAST  | 223 | --P-----EYLSDEIFSAINNNLPHAYFKNLLFRLVANMDRSELSDLG--- | 263 |
| FBXW7_HUMAN | 263 | TQVKHMMQVIEPQFQDFI--SLLPEKELAL----YVLSFLEPKDLLQA--- | 304 |
| CDC4_YEAST  | 264 | TLIK-----D-NLKRDLITS-LPFEISLKFNY-LQF-E--DIINSLGV    | 301 |
| FBXW7_HUMAN | 305 | AQTCRYW-RILAEDNLLWREKCKEEDIPLHIKRRKVIKPF-GFIHS-PW   | 351 |
| CDC4_YEAST  | 302 | SQN---WNKIIRKSTSLSW--K-K--L--L-IS-ENFVSPKGF-NSLNL   | 336 |
| FBXW7_HUMAN | 352 | K-S-AY--IRQHRIDTNWR-R-G--E---LK---SPK-V-----LKGDH   | 380 |
| CDC4_YEAST  | 337 | KLSQKYPKLSQ-Q-D---RLRLSFLNIFILKNWYNPKFVPQRTTLRGHM   | 381 |
| FBXW7_HUMAN | 381 | DHVITCLQFCGNRIVSGSDNTLKVWSAVTGK-CLRTLVGHTGGVWSSQM   | 429 |
| CDC4_YEAST  | 382 | TSVITCLQFEDNYVITGADDKMIRVYDSINKKFLQ--LSGHDGGVWA--L  | 428 |
| FBXW7_HUMAN | 430 | R---DNIISGSTDRTLKVWNAETGECIHTLY-GHTSTVRCMHLHE-K--   | 472 |
| CDC4_YEAST  | 429 | KYAHGGILVSGSTDRTRVVDIKKGCCTH-VFKGHNSTVRCLDIVEYKNI   | 477 |
| FBXW7_HUMAN | 473 | R-VVSGSRDATLRVVDI--ET-----GQ---CL--H-----VLM        | 498 |
| CDC4_YEAST  | 478 | KYIVTGSRDNTLHVWKLPKESSVPDHGEEHDYPLVFHTPEENPYFVGVL   | 527 |
| FBXW7_HUMAN | 499 | GHVAAVRCVQ-YDGRRVVSGAYD-FMVKVVD-PETETCLHTLQGHTRVY   | 545 |
| CDC4_YEAST  | 528 | GHMASVRTVSGH-GNIVVSGSYDNTLI-VWDVAQMK-CLYILSGHTDRIY  | 574 |
| FBXW7_HUMAN | 546 | S-LQFDGIH---VVSGLSDTSIRVVDVE---TG-----N---C-I       | 574 |
| CDC4_YEAST  | 575 | STI-YD--HERKRCISASMDTTIRIWDLENIWNNGECSYATNSASPAKI   | 621 |
| FBXW7_HUMAN | 575 | ----HTLTGHQSLTSG-MELKDNILVSGNADSTVKIWDIKTGQCLQTLQG  | 619 |
| CDC4_YEAST  | 622 | LGAMYTTLQGH TALV-GLLRLSDFLVSAADG SIRGWD--AND--YS--- | 663 |
| FBXW7_HUMAN | 620 | PNK---HQ---SAVTCLQF--NKNFVITSSDDGTVKLWDLKTGEFIR-NL  | 660 |
| CDC4_YEAST  | 664 | -RKFSYHHTNLSAIT--TFYVSDNILVSGSEN-QFNIYNLRSGKLVHAN-  | 708 |
| FBXW7_HUMAN | 661 | VTLESGGSGGVVWRIRASNTK---LVCAVGSRNGTEETKLL-VLDFDVM   | 706 |
| CDC4_YEAST  | 709 | I-LKDADQ---IWSV---NFKGKTLVAAV-EKDG--QS-FLEILDFS---  | 744 |
| FBXW7_HUMAN | 707 | K                                                   | 707 |
| CDC4_YEAST  | 745 | K                                                   | 745 |

-----

Name 1: PKNX1\_HUMAN  
Name 2: UNC62\_CAEL

Homeobox protein PKNX1 OS=Homo sapiens GN=PKNX1 PE=1 SV=3  
Homeobox protein unc-62 OS=Caenorhabditis elegans GN=unc-62 PE=1 SV=1

Needed for following interaction(s):  
worm genetic RASK\_HUMAN PKNX1\_HUMAN KRAS PKNX1 LET60\_CAEL  
UNC62\_CAEL

|                    |                  |
|--------------------|------------------|
| Length sequence 1: | 436              |
| Length sequence 2: | 564              |
| Sequence #1:       | PKNX1_HUMAN      |
| Sequence #2:       | UNC62_CAEL       |
| Length #1:         | 593              |
| Length #2:         | 593              |
| Matrix:            | BLOSUM62         |
| Gap open:          | 2.0              |
| Gap extend:        | 1.0              |
| Length:            | 593              |
| Identity:          | 202/593 (34.06%) |
| Similarity:        | 282/593 (47.55%) |
| Gaps:              | 218/593 (36.76%) |
| Score:             | 839.00           |

|             |     |                                                    |     |
|-------------|-----|----------------------------------------------------|-----|
| PKNX1_HUMAN | 3   | ATQTLSDSYQ-DGQMQVVELK---TEQ--D-----P-NCS-EPDAEG    | 39  |
| UNC62_CAEL  | 17  | AVQN-GISTYDLDTSSIK--RE-KRDHNEQFNDGYPPPGSASADP-ASY  | 61  |
| PKNX1_HUMAN | 40  | VSP-----PVESQTPM---DV-----DKQAIYRHPPLP             | 67  |
| UNC62_CAEL  | 62  | IADPAAFYNLYTNMGGAPT-S-TPMHHEMGEAMKRDKESIYAHPLYPL   | 109 |
| PKNX1_HUMAN | 68  | ALLFEKCE--QST-QG-S-EGTT-----SASF-DVDIEN-FVR-KQEKE  | 103 |
| UNC62_CAEL  | 110 | VLLFEKCELATSTPRDTSRDGSTSSDVCSSASFKD-DL-NEFVRHTQENA | 157 |
| PKNX1_HUMAN | 104 | GKPFCCDEPETDNLNVKAIQVLRHILLELEKVNELCKD-FCSRVIACLT  | 152 |
| UNC62_CAEL  | 158 | DKQYVVPNPQLDQIMLQSIQMLRFHILLELEKVHLEL-DNFCNRYVCLKG | 206 |
| PKNX1_HUMAN | 153 | KM-----NSE-----TL--L--SGEP---GS-----PYSP           | 170 |
| UNC62_CAEL  | 207 | KMPLDIVGDERASSQPPMSPGSMGLHSSSPSMAGGATPMHYPPPYEP    | 256 |
| PKNX1_HUMAN | 171 | VQSQQI-QSA-ITGTISP-QG-----IV-VPASAL-----QQGNVAM    | 203 |
| UNC62_CAEL  | 257 | -QSVPLPENAGVMGG-HPMEGSSMAYSMAGMAAAAASSSSSSNQAGDHPL | 304 |
| PKNX1_HUMAN | 204 | ATVAGGTVY-----Q---PVTVVTTP---QGQVVTQ--T-LS--P-GT   | 233 |
| UNC62_CAEL  | 305 | AN--GGTLHSTAGASQTLPLIAVSSPSTCSSGG-LRQDSTPLSGETPMG- | 350 |
| PKNX1_HUMAN | 234 | IRIQ-NSQLQLQLNQ--D-LSIL-HQDDG-----S---SKN-KRGVLP   | 267 |
| UNC62_CAEL  | 351 | -HANGNS-MD-SISEAGDEFVCGSNDGRDVSLSDSANGSQNGKRV-P    | 396 |
| PKNX1_HUMAN | 268 | ----KHA-TNMRSWLFQH-IGHPYTEDEKKQIAAQTNLTLQVNNWFI    | 311 |
| UNC62_CAEL  | 397 | KVFSKEAITK-FRAWLF-HNLTHYPYSEEQKQLAKETGLTILQVNNWFI  | 444 |
| PKNX1_HUMAN | 312 | NARRRILQPMLD-----S---S-CSETPKTKKTAQNR---PVQRFW     | 346 |
| UNC62_CAEL  | 445 | NARRRIVQPMIDQNNRAGRSGQMNVV---KNRRR---NRSEQSPGPS--  | 485 |
| PKNX1_HUMAN | 347 | PDSIA-SGVA--QPPSEL---T-M---SEGAVVITTPVNMNVDLSQL    | 386 |
| UNC62_CAEL  | 486 | PDSGSDSG-ANYSPPDSSLAASTAMPYPAE-FYMRTMPYG---GFPSF   | 529 |
| PKNX1_HUMAN | 387 | SSDGATLAVQVMMAG-Q-SEDESVDSTEE--DAGAL-APAH          | 423 |
| UNC62_CAEL  | 530 | TNP-A-MPFMNPMM-GFQVA--PTVDALSQQVWD---LSAP-H        | 563 |

-----

Name 1: MYO3B\_HUMAN  
Name 2: HSL1\_YEAST

Myosin-IIb OS=Homo sapiens GN=MYO3B PE=2 SV=4  
Probable serine/threonine-protein kinase HSL1 OS=Saccharomyces cerevisiae (strain ATCC 204508 / S288c) GN=HSL1 PE=1 SV=1

Needed for following interaction(s):  
yeast genetic PTTG1\_HUMAN MYO3B\_HUMAN PTTG1 MYO3B SECU\_YEAST

| HSL1_YEAST         |                   |                                                       |     |
|--------------------|-------------------|-------------------------------------------------------|-----|
| Length sequence 1: | 1341              |                                                       |     |
| Length sequence 2: | 1518              |                                                       |     |
| Sequence #1:       | MYO3B_HUMAN       |                                                       |     |
| Sequence #2:       | HSL1_YEAST        |                                                       |     |
| Length #1:         | 1744              |                                                       |     |
| Length #2:         | 1744              |                                                       |     |
| Matrix:            | BLOSUM62          |                                                       |     |
| Gap open:          | 2.0               |                                                       |     |
| Gap extend:        | 1.0               |                                                       |     |
| Length:            | 1744              |                                                       |     |
| Identity:          | 457/1744 (26.20%) |                                                       |     |
| Similarity:        | 713/1744 (40.88%) |                                                       |     |
| Gaps:              | 673/1744 (38.59%) |                                                       |     |
| Score:             | 1474.00           |                                                       |     |
| MYO3B_HUMAN        | 1                 | M-KHLYGLFHYNPMM-L-G-LE---S-----L--PDPT-----           | 24  |
| HSL1_YEAST         | 28                | MAK---V-NSNPKRASGHLERVVQSVNDATKRLSQPDSTVSVATKSSKR     | 72  |
| MYO3B_HUMAN        | 25                | ---DT---WEI IETIGKGYGKVKYKVT-NKRDGSLAAVKILDP----V-    | 61  |
| HSL1_YEAST         | 73                | KSRDVTGVPKWLKGTGKSGSSGRV-RLAKNMETQLAAIKIV-PKKAQFVH    | 120 |
| MYO3B_HUMAN        | 62                | -SDMDEEIEAEY-----NILQFLP-----NH--PNVVKFYG----         | 89  |
| HSL1_YEAST         | 121               | CSN-NGTVPNYSYSSMVTNSNVSS--PSIASREHSNHSQTN--P-YGIERE   | 164 |
| MYO3B_HUMAN        | 90                | -MFYK-ADHC-VGG--QLW-----LVLELCNGGSVTE-LV-KGLLRG       | 125 |
| HSL1_YEAST         | 165               | IVIMKLI SHTNMALFVWENKSELVYLVLEVVDGELFPDYLVSKGKL--P    | 212 |
| MYO3B_HUMAN        | 126               | QRLDEAMISYIYL GALL-GLQHLHN-NRI IHRDVKGN NILLTTEG-GVKL | 172 |
| HSL1_YEAST         | 213               | ER--EA-IHY--FKQIVEGVSYCHSFN-ICHRDLKPENLLLDKKNRRIKI    | 256 |
| MYO3B_HUMAN        | 173               | VDFGVSA-QLTSTRLRNRTSVGTFPFWMAPEVIACEQQYDSSYDARCDVWS   | 221 |
| HSL1_YEAST         | 257               | ADFGMAALELPN-KLLK-TSCGSPHYASPEIV-MGRPY--HGSPSDVWS     | 300 |
| MYO3B_HUMAN        | 222               | LGIT--AIELGDGDPPLF-DMHPV-KTLFKIP--RNPPPTLLHPEKWC      | 265 |
| HSL1_YEAST         | 301               | CGVLFAL-L-TGHL P-FNDDN-IKKLLLVQSGKYQMPNSLSE--ARD      | 344 |
| MYO3B_HUMAN        | 266               | FNHFISQCLIKDFERRPSVT--HLLDHPFIK----GVHGKVLFLQKQLA     | 308 |
| HSL1_YEAST         | 345               | ---LISKILVLDPEKR--ITTQELIKHPLIKKYDDL PVDN-KV--LRK-MR  | 385 |
| MYO3B_HUMAN        | 309               | KVLQDQKHQNPVA--KTRHERMHTRRPYHVEDAEKYCLEDDL VNL----    | 352 |
| HSL1_YEAST         | 386               | K---D---N-MARGKSNSD-LHLLN--NVSPS-----IVTLHSGKE        | 416 |
| MYO3B_HUMAN        | 353               | VLEDETIIHQ LQKRYADLLIYTYVGDI--LI-A--L-NPF--QNL SIYS   | 393 |
| HSL1_YEAST         | 417               | I-DE-SILRSLQ-----IL-W-H-G-VSRELITAKLLQKPMSEKFL-FYS    | 454 |
| MYO3B_HUMAN        | 394               | --PQF-SRLYHGV-----KR-A---S-NPPIH-FASADAAYQCMVT-       | 425 |
| HSL1_YEAST         | 455               | LLLYQKQR--HSISLSSSENKKSATESSVNEPRLEYAS-KTANN---TG     | 498 |
| MYO3B_HUMAN        | 426               | L-SK--DQCI-VI-SGESGSGKTESAHLIV-QH--LTFLGKAN--N-QT     | 463 |
| HSL1_YEAST         | 499               | LRSENND--VKTLSLEIHS EDT-ST---VNQNNAIT--G-VNTEINAPV    | 539 |
| MYO3B_HUMAN        | 464               | LREKILQ--VNSL-----VEAFGNSCT---AI---NDNSSR-F-GKYL      | 496 |
| HSL1_YEAST         | 540               | LAQK-SQFSINTLSQPESDKAEA--EAVTLPPAIPFNASSRIFRNSY-      | 585 |
| MYO3B_HUMAN        | 497               | EMMFTPTGVVMGARIS-EYL-LEKSRV- IKQA--AREKNFHIFYYIYAGL   | 541 |
| HSL1_YEAST         | 586               | -----TSI--SSR-SRRSLRLSNSRLSL-SASTSRE-T-----V----      | 614 |
| MYO3B_HUMAN        | 542               | H-HQKKSDFR LPEEK-PPRY-IADETGRVMH--DIT-S--KE-SYRRQF    | 582 |

|             |      |                                                      |      |
|-------------|------|------------------------------------------------------|------|
| HSL1_YEAST  | 615  | HDNEMPLP--QLP--KSPSRYSLS-R--RAIHASPTKSIHKLSL-S-RKNI  | 656  |
| MYO3B_HUMAN | 583  | EA-IQHCFR I I-GFTDKEVHSVYRILAGI----LNIGN--IEF-AAI-S- | 621  |
| HSL1_YEAST  | 657  | AATVA-ARRTLQNSASK--RSLYS-LQSI SKRSLNL-NDLLVFD DPLPSK | 701  |
| MYO3B_HUMAN | 622  | ---SQHQTDKSEVPNA-EA-----L--Q---NAAS-VLCISPEELQEA     | 654  |
| HSL1_YEAST  | 702  | KPASEN-VNKSE-PHSLESDSDFEILCDQILFGNALDRIL----EE-EE-   | 743  |
| MYO3B_HUMAN | 655  | LTSHCVVTRGET---IIRANTVD-R-AAD---VRDAMS--KALYG-RLF-   | 692  |
| HSL1_YEAST  | 744  | -DNE--KER-DTQRQ--RQN--DTKSSADFTTI-SGVSTNKENBGP E-YP  | 783  |
| MYO3B_HUMAN | 693  | SWI-VNRINTL-LQPDENIC SAGGMN V GILDIFGFEN-FQRNSF--EQ- | 736  |
| HSL1_YEAST  | 784  | TKIEKNQFN-MSYKPS ENM-S---GLS-S-PPIFEKENTLS-SSYLEEQK  | 825  |
| MYO3B_HUMAN | 737  | ----LCINIANEQI QYYFN---QHVFALE---QME-YQNEGID--A-V    | 770  |
| HSL1_YEAST  | 826  | PKRAALS-DITNS----FNKMNKQEGMRIEKKI QREQLQKKN-DRPSPL   | 868  |
| MYO3B_HUMAN | 771  | -PVEYED---NR-PLLD MFLO-KPLGLLALLD--EE-SRFP-QATDQTLV  | 810  |
| HSL1_YEAST  | 869  | KPIQHQLRVNSLP-ND---QGK P-S-LS-LDPRRNI SQ-PVNSKVESLL  | 910  |
| MYO3B_HUMAN | 811  | D--KF--EDNLRCKYFW-RPKGVELCFGI-QHYAG-K-VLYDASGV-LE-   | 850  |
| HSL1_YEAST  | 911  | QGLKFKKEP---ASH-WTHERG-SL-F-MSEHVEDKPV--KASDVSI ES   | 951  |
| MYO3B_HUMAN | 851  | -----KNRDTLPADV VVVLRTSENKLLQO-LFSIP--L-TK-T-        | 883  |
| HSL1_YEAST  | 952  | SYVPLTTVATSSRD--PS---VL--ABSSTIQKPLMLSPSSFLNTSMTF    | 993  |
| MYO3B_HUMAN | 884  | GNLAQTRA-----R-ITV---AS-S-SLPPHFSAGK--AKVDTEVIRHP    | 920  |
| HSL1_YEAST  | 994  | KNLSQILADDGDDKHL SV PQNSRVAM-SH-PLRKQSAKI-SL-T---P   | 1036 |
| MYO3B_HUMAN | 921  | EE--TTNM--KR-Q-TVASYFRYSLMDL--LSKMVVG-Q-P-H-F-VRCI   | 957  |
| HSL1_YEAST  | 1037 | RSNLNANLSV KR NQSGPSYL--S-NDLDGISDMTFAMEIPTNTFTAQAI  | 1083 |
| MYO3B_HUMAN | 958  | K--PND-D--R-----EALQFSRERVL--AQL---R---S-TG-ILE-     | 984  |
| HSL1_YEAST  | 1084 | QLMNNDTDNNKINTSPKASSFTKEKVIKSAAYISKEKEPDNSDTNYIPDY   | 1133 |
| MYO3B_HUMAN | 985  | TVSIRRGYSHR-I-LFEEFVKRYYLAF TAHQTP L--ASKES-C-VAIL   | 1028 |
| HSL1_YEAST  | 1134 | TIP---NTYDEKAINIFED-----A-PSDEGLNTSSSES DSRASVH      | 1171 |
| MYO3B_HUMAN | 1029 | EK--SRLD-----HWVL-GKT--KVFLKYYHVEQLNL--LLR----EVIG   | 1062 |
| HSL1_YEAST  | 1172 | RKAVS-IDTMATTN-VLTPATNVRVSL-YWN--N-NSSGIPRETTEILS    | 1215 |
| MYO3B_HUMAN | 1063 | RVVVL--Q--AYTKGWL GARRYKRVR EKREKGAIAI-QSAWRGYDARRKF | 1107 |
| HSL1_YEAST  | 1216 | K-LRLSPENPSNTH--M-QKRFSSSTRGSRDSNALGISQS-----LQSMF   | 1255 |
| MYO3B_HUMAN | 1108 | KKISNRNRESAAH-NQAGD--TSNQS-S--GP--HS--P--VAAGTR--    | 1142 |
| HSL1_YEAST  | 1256 | KDL--EEDQD-GHTSQA-DILESSMSYSKRRPSEESVNPQQRV---TMLF   | 1298 |
| MYO3B_HUMAN | 1143 | GSAEVQDCSEPGDHKVLGRSVHRRSHSQAESNNGR-TQTSSN--SPA VTE  | 1189 |
| HSL1_YEAST  | 1299 | DEEE-EE-SK---KVGGGKI-KEEHTKLD--N-KISESSQLVLP-VVE     | 1337 |
| MYO3B_HUMAN | 1190 | K--NGHSAQS--S--PK-GC----DIFAGHAN-K-HSVSGT--DLLSS     | 1223 |
| HSL1_YEAST  | 1338 | KKENANN-TENNYSKIPKPTIKVTKDT-AMESNTQTH---TKKPI LKS    | 1381 |
| MYO3B_HUMAN | 1224 | --RI-CHPAP--DQQGLSLWGAP--QKPGSENGL--AQK-HRTPRRRCQQ   | 1263 |
| HSL1_YEAST  | 1382 | VQNVEVEEAPSSDKK--N-WFVKLFQNFSSHN NATKASKNHVT-----    | 1421 |

```
MYO3B_HUMAN 1264 PKMLSSPEDT-MY-YNQLN-GTLEYQGSKRKPRKLGQIKVL--D----G 1303
      . :|. :|. |. . |:.| .:::| | .|...|. |: ||: |
HSL1_YEAST 1422 -N-ISF-DDAHMLTLNEFNKNSIDYQ-LKNLDHKFGR-KVVEYDCKFVKG 1466

MYO3B_HUMAN 1304 EDEY-YK-SL-S-P----VDCIPEENNSAHPSFFSSSSKG-DSF 1338
      . : | .: | | | | .:..|. | | .:| | :|. :. |
HSL1_YEAST 1467 --NFKFKIKITSTPNASSV--ITVKKRSKH-S-NTSSNKAFEKF 1504
```

-----
